# Supplementary material for: CRISPR/Cas9 genome-wide screening identifies LUC7L2 that promotes radioresistance via autophagy in nasopharyngeal carcinoma cells
Source: Cell Death Discov. 2021 Dec 14;7:392. doi: 10.1038/s41420-021-00783-8 (PMC8671510; doi:10.1038/s41420-021-00783-8)
Supplement: Supplementary file 1 — Table S1 [file 41420_2021_783_MOESM1_ESM.xlsx]

## Sheet: gene_summary_RRA
Table S1. Differential gene expression (IR/NonIR) analysis after CRISPR/Cas9 high-throughput screening and sequencing
Gene ID	Neg|Score	Neg|P-Value	Neg|FDR	NegRank	Pos|Score	Pos|P-Value	Pos|FDR	Pos|Rank
CDKN2A	1.5442e-16	2.59e-07	0.000707	1	1	1	1	19114
USP7	4.9744e-11	2.59e-07	0.000707	2	1	1	1	19113
C16orf72	1.5004e-09	2.59e-07	0.000707	3	0.99815	0.99814	1	18999
DET1	1.6846e-09	2.59e-07	0.000707	4	1	1	1	19112
ERCC6L2	1.8342e-09	2.59e-07	0.000707	5	1	1	1	19111
RB1	3.7281e-09	2.59e-07	0.000707	6	1	1	1	19110
RFWD2	8.6145e-09	2.59e-07	0.000707	7	0.98623	0.9862	1	18687
TIAL1	2.9473e-07	1.295e-06	0.003094	8	0.99989	0.99989	1	19081
LUC7L2	1.0923e-06	3.885e-06	0.008251	9	1	1	1	19109
LIN37	1.5548e-06	4.921e-06	0.009406	10	0.99999	0.99999	1	19102
FBXW7	1.9394e-06	6.475e-06	0.011251	11	1	1	1	19108
DEGS2	2.657e-06	8.5469e-06	0.013614	12	1	1	1	19107
PDS5A	2.9145e-06	1.0619e-05	0.015613	13	1	1	1	19106
ADAMTS7	4.3612e-06	1.6317e-05	0.022112	14	1	1	1	19105
UBE2R2	4.5597e-06	1.7353e-05	0.022112	15	1	1	1	19104
DCLRE1C	5.6743e-06	2.1497e-05	0.025681	16	0.99999	0.99999	1	19103
NHEJ1	6.6174e-06	2.5641e-05	0.028829	17	0.99993	0.99992	1	19088
CCNF	1.1323e-05	4.3253e-05	0.04593	18	0.99688	0.99691	1	18956
HNRNPH1	1.6784e-05	6.7599e-05	0.064581	19	0.99998	0.99998	1	19101
RBM7	1.711e-05	6.9153e-05	0.064581	20	0.99998	0.99998	1	19100
LIN54	1.8203e-05	7.3815e-05	0.064581	21	0.99998	0.99998	1	19099
RGS13	1.8532e-05	7.4333e-05	0.064581	22	0.65118	0.65259	1	12351
CSK	1.9616e-05	7.8477e-05	0.065217	23	0.99998	0.99998	1	19098
GAGE10	2.1735e-05	8.8318e-05	0.068317	24	0.61829	0.62332	1	11788
NF1	2.1977e-05	8.9354e-05	0.068317	25	0.99296	0.99298	1	18854
UBE2D3	2.5181e-05	0.00010075	0.071324	26	0.9999	0.9999	1	19083
OSGIN1	2.5181e-05	0.00010075	0.071324	27	0.3817	0.45496	1	8582
GINM1	2.9333e-05	0.00011629	0.079385	28	0.99997	0.99997	1	19097
ACTR5	3.3918e-05	0.00013028	0.084957	29	0.99997	0.99996	1	19096
UBAP2L	3.5399e-05	0.00013546	0.084957	30	0.99996	0.99996	1	19095
RBL1	3.5735e-05	0.00013779	0.084957	31	0.99995	0.99995	1	19090
SCAF8	4.1297e-05	0.00016084	0.093331	32	0.99996	0.99996	1	19094
XRCC4	4.221e-05	0.00016395	0.093331	33	0.99996	0.99996	1	19093
SDHB	4.2637e-05	0.00016602	0.093331	34	0.99996	0.99996	1	19092
STAG2	4.6705e-05	0.00018285	0.097497	35	0.99995	0.99995	1	19091
PRKDC	4.6879e-05	0.00018363	0.097497	36	0.99943	0.99944	1	19039
FXR1	4.9803e-05	0.00019606	0.101284	37	0.99995	0.99995	1	19089
IPPK	5.5012e-05	0.00021626	0.106245	38	0.99643	0.99645	1	18938
USP3	5.5083e-05	0.00021678	0.106245	39	0.88893	0.88888	1	16756
CLRN2	5.6757e-05	0.00022507	0.10755	40	0.79903	0.79896	1	15097
RYR1	7.2728e-05	0.00029034	0.131403	41	0.99993	0.99992	1	19087
C7orf49	7.672e-05	0.00030899	0.131403	42	0.9831	0.9831	1	18618
DPH2	7.7229e-05	0.00031209	0.131403	43	0.99992	0.99992	1	19086
HNF1B	7.7333e-05	0.00031209	0.131403	44	0.99753	0.99752	1	18978
UBR4	7.8533e-05	0.00031572	0.131403	45	0.99992	0.99992	1	19085
TEX26	7.8774e-05	0.00031624	0.131403	46	0.99992	0.99992	1	19084
SENP8	8.5187e-05	0.00034058	0.138509	47	0.99644	0.99647	1	18939
NOSIP	9.2392e-05	0.00036545	0.145524	48	0.99875	0.99873	1	19014
FANCF	0.00010318	0.00040896	0.156535	49	0.9999	0.9999	1	19082
MEN1	0.00010339	0.00040948	0.156535	50	0.99457	0.99459	1	18899
DHX29	0.00012417	0.00049028	0.183751	51	0.99988	0.99988	1	19080
PGLS	0.00012877	0.00050997	0.184467	52	0.99987	0.99988	1	19079
CCDC25	0.00012921	0.00051152	0.184467	53	0.99987	0.99988	1	19078
CABYR	0.00013322	0.00052913	0.184467	54	0.78956	0.78944	1	14903
PLAGL1	0.00013662	0.00054519	0.184467	55	0.99986	0.99987	1	19076
STAG1	0.00013824	0.00054985	0.184467	56	0.99986	0.99987	1	19077
DSTYK	0.00013895	0.00055193	0.184467	57	0.99986	0.99986	1	19075
ZNF426	0.00014244	0.00056747	0.184467	58	0.99986	0.99986	1	19074
NEK2	0.00014309	0.00057109	0.184467	59	0.99986	0.99986	1	19073
HNRNPR	0.00014575	0.00058197	0.184467	60	0.99985	0.99986	1	19072
FCHO2	0.0001483	0.0005887	0.184467	61	0.99985	0.99986	1	19071
C1QTNF4	0.00016143	0.00063222	0.194906	62	0.70448	0.70418	1	13327
RAB33B	0.00017733	0.00068557	0.207999	63	0.99982	0.99983	1	19070
ICK	0.00018982	0.00071924	0.210432	64	0.91213	0.91213	1	17186
RBM10	0.00019037	0.00072079	0.210432	65	0.99981	0.99981	1	19069
CLEC4A	0.00019335	0.00073063	0.210432	66	0.89823	0.89815	1	16917
EWSR1	0.00019559	0.00074203	0.210432	67	0.99964	0.99964	1	19055
HPSE2	0.00019744	0.00074876	0.210432	68	0.9998	0.9998	1	19068
POLQ	0.0002008	0.00075964	0.210432	69	0.95862	0.95863	1	18100
C11orf49	0.00020309	0.00077207	0.210465	70	0.9998	0.9998	1	19067
LMNA	0.00020772	0.00078658	0.210465	71	0.99979	0.99979	1	19066
RNF8	0.00020886	0.00079279	0.210465	72	0.99979	0.99979	1	19065
SEPHS2	0.0002223	0.00084045	0.22006	73	0.99978	0.99978	1	19064
PSTK	0.00023444	0.00088034	0.227388	74	0.99949	0.99949	1	19043
IKBKAP	0.00025453	0.0009513	0.242379	75	0.35938	0.44181	1	8340
ARL5B	0.00025799	0.00096373	0.242379	76	0.94932	0.94937	1	17917
FUBP1	0.00026717	0.00099533	0.245997	77	0.99973	0.99973	1	19063
LGALS12	0.00027811	0.0010326	0.245997	78	0.18709	0.29228	1	5536
GDAP1	0.00027859	0.0010337	0.245997	79	0.99546	0.99545	1	18919
ABCA8	0.00028	0.0010394	0.245997	80	0.99972	0.99972	1	19062
CTAG1A	0.0002813	0.0010425	0.245997	81	0.44307	0.49311	1	9299
ALYREF	0.00028991	0.0010746	0.250483	82	0.7536	0.75341	1	14233
BAZ2A	0.00029494	0.0010938	0.251879	83	0.99971	0.99971	1	19061
SDHA	0.00030772	0.0011424	0.259095	84	0.99969	0.99969	1	19060
SAFB	0.00031219	0.0011569	0.259095	85	0.99969	0.99969	1	19059
OR2A25	0.00031491	0.0011658	0.259095	86	0.99969	0.99969	1	19058
SPZ1	0.0003184	0.0011797	0.25919	87	0.11174	0.19771	0.994545	3779
ZNF852	0.00032907	0.0012181	0.26457	88	0.95404	0.95407	1	18016
KIF22	0.00033458	0.0012336	0.264935	89	0.99967	0.99966	1	19057
PDS5B	0.00036185	0.0013284	0.282123	90	0.99964	0.99964	1	19056
SLC2A9	0.00038366	0.0014092	0.294421	91	0.99962	0.99961	1	19054
UBE2T	0.00038763	0.0014216	0.294421	92	0.99961	0.99961	1	19053
RNH1	0.00039039	0.0014325	0.294421	93	0.99961	0.99961	1	19052
TCP11L2	0.00039661	0.0014548	0.294997	94	0.73433	0.73396	1	13896
ZNF318	0.00040039	0.0014662	0.294997	95	0.9996	0.9996	1	19051
UBR5	0.00041702	0.0015289	0.295693	96	0.98175	0.98178	1	18592
DAZAP1	0.00041858	0.0015351	0.295693	97	0.99958	0.99958	1	19050
ZC2HC1A	0.00041928	0.0015372	0.295693	98	0.70315	0.70289	1	13302
LIN52	0.00042336	0.001547	0.295693	99	0.99958	0.99958	1	19048
PCNP	0.00042336	0.001547	0.295693	100	0.99958	0.99958	1	19049
KLRG1	0.0004291	0.0015688	0.296883	101	0.025535	0.064172	0.950726	1278
RBMY1B	0.00043391	0.001589	0.297758	102	0.7144	0.71406	1	13525
VAV3	0.00044562	0.0016351	0.300566	103	0.99955	0.99955	1	19047
EEFSEC	0.00044901	0.0016511	0.300566	104	0.99955	0.99955	1	19046
EIF3L	0.00044901	0.0016511	0.300566	105	0.99955	0.99955	1	19045
USPL1	0.00047233	0.0017412	0.313983	106	0.77959	0.77931	1	14708
PRPF18	0.00049606	0.00182	0.325113	107	0.9995	0.99951	1	19044
KATNB1	0.00051966	0.0019065	0.337413	108	0.99948	0.99949	1	19042
TNPO1	0.00052492	0.0019257	0.337678	109	0.99948	0.99948	1	19041
MPLKIP	0.00053338	0.0019567	0.340009	110	0.59287	0.60197	1	11376
YY1AP1	0.00055071	0.0020147	0.341672	111	0.41105	0.47292	1	8903
C19orf43	0.00055228	0.0020199	0.341672	112	0.26652	0.39047	1	7405
FNBP4	0.00055863	0.0020463	0.343104	113	0.99944	0.99945	1	19040
FAM46A	0.00056836	0.0020961	0.348386	114	0.83878	0.83865	1	15839
BRD3	0.00057975	0.0021334	0.351231	115	0.83478	0.83476	1	15765
SERBP1	0.00058651	0.0021499	0.351231	116	0.49815	0.53021	1	10003
LIG4	0.00059442	0.0021738	0.352114	117	0.99439	0.9944	1	18893
ZNF354A	0.00059874	0.0021924	0.352151	118	0.9994	0.99941	1	19038
NFE2L2	0.00060521	0.0022142	0.352175	119	0.98657	0.98651	1	18697
KCNK15	0.00061225	0.0022401	0.352175	120	0.9448	0.94485	1	17815
CEP70	0.00061374	0.0022478	0.352175	121	0.99939	0.9994	1	19037
WBP11	0.00062248	0.0022794	0.354222	122	0.96817	0.96823	1	18300
ASL	0.00063403	0.0023167	0.357114	123	0.99937	0.99938	1	19036
UBXN4	0.00064642	0.0023587	0.359928	124	0.98437	0.98436	1	18637
FBXL13	0.00065816	0.0024012	0.359928	125	0.91929	0.91935	1	17317
TAS2R13	0.00066519	0.002425	0.359928	126	0.99933	0.99935	1	19035
RNF5	0.000666	0.0024286	0.359928	127	0.99743	0.99741	1	18976
PLCD3	0.00066617	0.0024291	0.359928	128	0.99933	0.99935	1	19034
USP24	0.00068837	0.0019868	0.341672	129	0.90101	0.90112	1	16961
OTUD5	0.00069569	0.0025384	0.373229	130	0.9993	0.99932	1	19033
ZFHX3	0.00071224	0.0026058	0.3792	131	0.99929	0.9993	1	19032
FEN1	0.00071745	0.0026187	0.3792	132	0.94115	0.94123	1	17745
C1orf216	0.00073457	0.0026814	0.382068	133	0.97814	0.9783	1	18515
JADE2	0.00073954	0.0026938	0.382068	134	0.98419	0.98417	1	18634
CDKL3	0.00074127	0.0026985	0.382068	135	0.99904	0.99904	1	19023
DMRTA2	0.00075791	0.0027586	0.385888	136	0.081944	0.15985	0.989014	3083
PHF6	0.0007615	0.0027721	0.385888	137	0.99924	0.99924	1	19031
FBXW11	0.00076577	0.002786	0.385888	138	0.3948	0.46292	1	8722
GGT5	0.00077367	0.0028145	0.387029	139	0.97703	0.97724	1	18496
NUFIP2	0.00079669	0.0028917	0.394802	140	0.58914	0.59889	1	11304
ADAMTS8	0.00080509	0.0029212	0.396004	141	0.99919	0.99919	1	19030
CDC14B	0.00081287	0.002943	0.396144	142	0.74634	0.74598	1	14113
CHI3L1	0.00083373	0.0030181	0.403413	143	0.14407	0.23845	1	4529
PSIP1	0.00085578	0.0031031	0.405201	144	0.1242	0.21335	0.9955	4085
PDCL3	0.00085733	0.0031093	0.405201	145	0.99914	0.99914	1	19029
KRTAP5-1	0.00086498	0.0031357	0.405201	146	0.99914	0.99913	1	19028
GRIK1	0.00086529	0.0031372	0.405201	147	0.84148	0.84133	1	15888
KLF13	0.00087963	0.0031989	0.405201	148	0.99912	0.99912	1	19027
PROCR	0.00088092	0.0032056	0.405201	149	0.86941	0.8693	1	16397
AP2A1	0.00088379	0.003216	0.405201	150	0.99912	0.99911	1	19026
RANBP9	0.00089731	0.0032512	0.405201	151	0.9991	0.9991	1	19025
GLIS3	0.0009005	0.0032605	0.405201	152	0.994	0.99405	1	18885
XCL2	0.00090134	0.0032616	0.405201	153	0.54653	0.56532	1	10696
RDH12	0.00090263	0.0032647	0.405201	154	0.87068	0.87057	1	16420
CCDC170	0.00092459	0.0033496	0.409708	155	0.64103	0.64335	1	12173
RBM19	0.00092582	0.0033522	0.409708	156	0.14463	0.23917	1	4544
XRCC1	0.00093591	0.0033859	0.409708	157	0.41434	0.47495	1	8946
WHSC1	0.00094142	0.003404	0.409708	158	0.79352	0.79343	1	14988
BZW2	0.00094317	0.0034082	0.409708	159	0.99906	0.99906	1	19024
UBE2D2	0.00096536	0.0034916	0.416795	160	0.68929	0.68912	1	13005
FBLIM1	0.00097014	0.0035107	0.416795	161	0.082233	0.16021	0.989014	3090
NCAPG2	0.00099459	0.0035926	0.423708	162	0.99901	0.999	1	19022
USP37	0.0010006	0.0036133	0.423708	163	0.999	0.99899	1	19021
UBE2H	0.0010125	0.0036568	0.426195	164	0.99899	0.99898	1	19020
RAB35	0.0010226	0.003691	0.426479	165	0.85398	0.85384	1	16118
PSMA3	0.0010285	0.0037133	0.426479	166	0.99897	0.99896	1	19019
FAXDC2	0.0010363	0.0037464	0.426479	167	0.59196	0.60124	1	11359
MAMDC4	0.001037	0.0037485	0.426479	168	0.99896	0.99895	1	19018
EXO1	0.0010464	0.0037915	0.428818	169	0.98205	0.98208	1	18598
AAAS	0.0010708	0.0038832	0.435673	170	0.98557	0.98555	1	18675
SLC7A6	0.001075	0.0038977	0.435673	171	0.4361	0.48865	1	9223
FAM228B	0.001115	0.0040396	0.445685	172	0.059503	0.13088	0.983407	2537
XKRY2	0.0011274	0.0040774	0.445685	173	0.22808	0.34326	1	6485
TRIP12	0.0011306	0.0040867	0.445685	174	0.99796	0.99796	1	18992
UBE2C	0.0011308	0.0040873	0.445685	175	0.99887	0.99885	1	19017
SDHD	0.0011349	0.0041038	0.445685	176	0.98824	0.98824	1	18755
SERPINB6	0.0011457	0.0041432	0.447418	177	0.99771	0.99772	1	18984
HMCES	0.001187	0.0042877	0.458847	178	0.99881	0.99879	1	19016
APITD1	0.0011901	0.004297	0.458847	179	0.99881	0.99879	1	19015
ADGRE1	0.0012204	0.0044037	0.466788	180	0.79891	0.79885	1	15095
SETX	0.0012288	0.0044328	0.466788	181	0.98282	0.98284	1	18613
ARV1	0.0012322	0.0044447	0.466788	182	0.013648	0.037071	0.906644	779
GABBR2	0.0012539	0.0045141	0.469503	183	0.99875	0.99873	1	19013
IFNA1	0.0012557	0.0045203	0.469503	184	0.99874	0.99873	1	19012
WDR25	0.0012704	0.0045747	0.469503	185	0.48212	0.51918	1	9797
ARFIP1	0.0012736	0.0045856	0.469503	186	0.99582	0.9958	1	18926
MAPKAP1	0.0012764	0.0045933	0.469503	187	0.99872	0.9987	1	19011
KLHDC1	0.0012846	0.0046203	0.469744	188	0.10047	0.18328	0.990942	3530
USP17L26	0.0013025	0.0046783	0.473022	189	0.93635	0.93641	1	17647
OR5B21	0.0013257	0.0047591	0.473022	190	0.99867	0.99864	1	19010
DARS2	0.001335	0.0047907	0.473022	191	0.99867	0.99863	1	19009
NUDT9	0.0013398	0.0048042	0.473022	192	0.42551	0.48194	1	9089
C7orf55-LUC7L2	0.0013571	0.0048637	0.473022	193	0.94541	0.94542	1	17829
GPR45	0.0013619	0.0048819	0.473022	194	0.99847	0.99844	1	19005
PEX1	0.001363	0.004885	0.473022	195	0.99864	0.9986	1	19008
MPP4	0.0013632	0.004887	0.473022	196	0.94662	0.94667	1	17863
PTTG1IP	0.0013632	0.004887	0.473022	197	0.67065	0.67089	1	12685
TXLNG	0.0013688	0.0049	0.473022	198	0.17374	0.27569	1	5245
ST6GALNAC3	0.0013769	0.0049311	0.473631	199	0.8981	0.89801	1	16912
CCDC86	0.0014027	0.0050228	0.480025	200	0.83276	0.83273	1	15723
PIGF	0.0014146	0.0050668	0.481824	201	0.65069	0.65215	1	12342
CGB	0.0014356	0.0051409	0.486447	202	0.73445	0.73407	1	13897
HPSE	0.0014851	0.0052978	0.498829	203	0.46196	0.50558	1	9544
L1TD1	0.0014976	0.0053403	0.499688	204	0.9985	0.99847	1	19007
TRIM16	0.0015034	0.0053639	0.499688	205	0.62903	0.63269	1	11964
FAM35A	0.001509	0.0053854	0.499688	206	0.99849	0.99846	1	19006
BARHL2	0.0015575	0.0055537	0.512819	207	0.74168	0.74133	1	14036
C12orf60	0.0015671	0.0055884	0.513542	208	0.98697	0.98692	1	18710
SCAMP4	0.0015866	0.0056614	0.516337	209	0.94989	0.94994	1	17937
RPS6KA1	0.00159	0.0056728	0.516337	210	0.99841	0.99839	1	19004
RUFY4	0.0016252	0.0058065	0.523515	211	0.76971	0.76947	1	14529
FMNL2	0.0016252	0.0058065	0.523515	212	0.21788	0.33066	1	6265
GAREML	0.0016428	0.0058686	0.526635	213	0.89051	0.89046	1	16787
ZNF658	0.001668	0.0059495	0.529427	214	0.98987	0.98983	1	18793
MRFAP1L1	0.0016697	0.0059551	0.529427	215	0.99712	0.99713	1	18966
GDPD1	0.0016985	0.0060567	0.530581	216	0.9983	0.99829	1	19003
ZDHHC17	0.0017034	0.0060743	0.530581	217	0.99321	0.99324	1	18861
FAM83C	0.0017038	0.0060753	0.530581	218	0.14239	0.23634	1	4496
RPRD1B	0.0017063	0.0060826	0.530581	219	0.48889	0.52378	1	9875
VSTM2B	0.0017124	0.0061069	0.530581	220	0.6616	0.66224	1	12534
TMEM88B	0.0017562	0.0062577	0.541177	221	0.60576	0.61264	1	11592
LSM12	0.0017682	0.0063058	0.541177	222	0.3202	0.41948	1	7942
PADI6	0.0017819	0.0063493	0.541177	223	0.99822	0.99821	1	19002
USP17L3	0.0017978	0.006396	0.541177	224	0.97372	0.97385	1	18430
ZKSCAN4	0.0018046	0.0064125	0.541177	225	0.73121	0.7309	1	13837
ABCC2	0.0018263	0.0064923	0.541177	226	0.97973	0.97984	1	18552
TDRD5	0.0018341	0.0065224	0.541177	227	0.99817	0.99816	1	19001
GPR12	0.0018348	0.0065244	0.541177	228	0.96645	0.96649	1	18267
RPA2	0.0018364	0.0065306	0.541177	229	0.99816	0.99816	1	19000
SEC13	0.0018415	0.0065534	0.541177	230	0.94438	0.94445	1	17805
DAXX	0.0018479	0.0065793	0.541177	231	0.99734	0.99733	1	18974
TMEM240	0.0018687	0.0066513	0.541177	232	0.99813	0.99812	1	18998
PPP1R11	0.0018723	0.0066643	0.541177	233	0.9928	0.99283	1	18846
OR51I2	0.0018748	0.0066721	0.541177	234	0.99813	0.99812	1	18997
KIF18A	0.001875	0.0066726	0.541177	235	0.98535	0.98534	1	18670
TMEM229A	0.0018782	0.0066819	0.541177	236	0.99812	0.99811	1	18996
DDB1	0.0019086	0.0068078	0.548028	237	0.30677	0.41203	1	7812
MTRNR2L10	0.0019134	0.0068238	0.548028	238	0.058099	0.12908	0.982054	2507
XYLT2	0.0019237	0.0068596	0.548594	239	0.66311	0.66361	1	12561
DDIAS	0.0019347	0.0068958	0.549196	240	0.1868	0.29193	1	5525
SDR42E1	0.0019687	0.0070139	0.556284	241	0.99803	0.99802	1	18995
ZNF578	0.001992	0.0070999	0.558469	242	0.83032	0.83031	1	15672
DSC2	0.001992	0.0070999	0.558469	243	0.12245	0.21119	0.9955	4045
GADD45GIP1	0.0020312	0.0072455	0.566518	244	0.99797	0.99797	1	18994
DNAJC16	0.0020347	0.0072615	0.566518	245	0.99797	0.99796	1	18993
C20orf78	0.0020458	0.007305	0.567472	246	0.99795	0.99795	1	18991
ADGRA2	0.0020579	0.007347	0.567472	247	0.10673	0.19124	0.994545	3663
ROMO1	0.0020873	0.0074537	0.567472	248	0.99791	0.99791	1	18990
FBXW4	0.0020893	0.007461	0.567472	249	0.69142	0.69126	1	13041
IFI44L	0.0020964	0.0074882	0.567472	250	0.97341	0.97356	1	18423
ADORA1	0.0020968	0.0074889	0.567472	251	0.9979	0.9979	1	18989
POMP	0.0021011	0.0075045	0.567472	252	0.9979	0.99789	1	18988
RBX1	0.0021382	0.0076412	0.567472	253	0.49417	0.52741	1	9936
CDK2	0.0021382	0.0076412	0.567472	254	0.99294	0.99297	1	18853
NOP56	0.002145	0.0076718	0.567472	255	0.99786	0.99785	1	18987
SNX31	0.0021491	0.0076868	0.567472	256	0.84713	0.84697	1	15997
UGGT1	0.0021491	0.0076868	0.567472	257	0.12459	0.21386	0.9955	4101
MOCOS	0.0021505	0.0076894	0.567472	258	0.58502	0.59555	1	11244
RAD9B	0.0021726	0.0077718	0.571344	259	0.99783	0.99783	1	18986
ATAD3B	0.0022038	0.0078821	0.577235	260	0.96157	0.96158	1	18168
SYK	0.0022495	0.0080572	0.586248	261	0.98468	0.98467	1	18649
RPAP3	0.0022516	0.0080665	0.586248	262	0.94974	0.94979	1	17932
PHLDB2	0.0022732	0.0081359	0.586291	263	0.99773	0.99773	1	18985
UBASH3B	0.00228	0.0081618	0.586291	264	0.91491	0.91495	1	17241
TGDS	0.0022872	0.0081862	0.586291	265	0.99771	0.99772	1	18983
TCOF1	0.0022884	0.0081898	0.586291	266	0.74776	0.74746	1	14132
MYCL	0.0023131	0.0082799	0.589144	267	0.99769	0.99769	1	18982
SGK223	0.0023361	0.0083587	0.589144	268	0.99766	0.99766	1	18981
CUL5	0.0023554	0.0084213	0.589144	269	0.99764	0.99764	1	18980
KDM4A	0.0023847	0.008526	0.589144	270	0.12239	0.21111	0.9955	4043
ACTRT1	0.0023847	0.008526	0.589144	271	0.036907	0.089055	0.95668	1772
DUSP11	0.0023847	0.008526	0.589144	272	0.72071	0.72049	1	13637
SELT	0.0023881	0.0085384	0.589144	273	0.74254	0.7422	1	14048
HOPX	0.0023913	0.0085467	0.589144	274	0.77279	0.77254	1	14583
CELA3A	0.0023924	0.0085498	0.589144	275	0.99761	0.9976	1	18979
FAM177A1	0.0024004	0.0085783	0.589144	276	0.7747	0.77443	1	14619
LATS2	0.002405	0.0085871	0.589144	277	0.78763	0.78749	1	14863
CSRNP3	0.0024096	0.0085995	0.589144	278	0.11713	0.20448	0.994545	3918
COMMD3	0.0024262	0.0086645	0.591478	279	0.67816	0.67817	1	12808
NAA30	0.0024682	0.0088083	0.597377	280	0.056702	0.12732	0.980441	2478
ID3	0.002476	0.0088311	0.597377	281	0.99744	0.99743	1	18977
INSIG1	0.0024884	0.0088798	0.597377	282	0.086855	0.16609	0.989014	3198
NR2F1	0.0024895	0.0088844	0.597377	283	0.29914	0.40783	1	7735
SPACA4	0.0024962	0.0089072	0.597377	284	0.099133	0.18162	0.990942	3499
FAM151B	0.0025433	0.0090523	0.604982	285	0.56702	0.58109	1	10971
FAM175A	0.0026014	0.0092501	0.613193	286	0.9865	0.98645	1	18696
PPP1R1C	0.0026015	0.0092501	0.613193	287	0.9974	0.99739	1	18975
RFPL4B	0.0026065	0.0092714	0.613193	288	0.15831	0.25637	1	4877
ZNF451	0.0026206	0.0093159	0.613606	289	0.22405	0.33833	1	6387
TMEM244	0.002629	0.0093418	0.613606	290	0.98976	0.98972	1	18790
CLDN18	0.0026465	0.0093962	0.613777	291	0.92467	0.92482	1	17406
SUN5	0.0026547	0.009418	0.613777	292	0.6142	0.6198	1	11728
SV2B	0.0026618	0.0094407	0.613777	293	0.99734	0.99733	1	18973
DYRK1A	0.0027007	0.0095697	0.619427	294	0.91871	0.91876	1	17305
ZGRF1	0.0027251	0.0096521	0.619427	295	0.92431	0.92447	1	17403
SLC39A13	0.0027251	0.0096521	0.619427	296	0.35252	0.43777	1	8277
SLC35G6	0.0027264	0.0096573	0.619427	297	0.99727	0.99726	1	18972
C11orf31	0.0027413	0.0076371	0.567472	298	0.99726	0.99731	1	18971
TERF1	0.0027602	0.0097795	0.624703	299	0.7501	0.74983	1	14168
SPATA5L1	0.0027669	0.0098049	0.624703	300	0.99723	0.99723	1	18970
SNX14	0.0027822	0.0098629	0.624814	301	0.99722	0.99722	1	18969
ZCCHC18	0.0027968	0.0099132	0.624814	302	0.9972	0.99721	1	18968
SMAD4	0.0028036	0.0099354	0.624814	303	0.97315	0.97328	1	18415
WTIP	0.0028118	0.0099655	0.624814	304	0.43683	0.4891	1	9229
PTCD1	0.0028228	0.010003	0.624814	305	0.30407	0.41054	1	7779
MAGOH	0.0028228	0.010003	0.624814	306	0.9392	0.93929	1	17706
DNTT	0.0028561	0.01012	0.627726	307	0.91537	0.91543	1	17254
EFS	0.0028628	0.010147	0.627726	308	0.99714	0.99714	1	18967
ASS1	0.0028791	0.010205	0.627726	309	0.99712	0.99713	1	18965
HDAC4	0.0028811	0.01021	0.627726	310	0.99028	0.99027	1	18803
CDH13	0.0028821	0.010214	0.627726	311	0.31084	0.41434	1	7842
CACNA1B	0.0029246	0.010353	0.634217	312	0.99708	0.99709	1	18964
POLR2J2	0.0029332	0.010386	0.634217	313	0.9664	0.96645	1	18266
KRTAP10-9	0.0029561	0.010471	0.636414	314	0.99704	0.99706	1	18963
CDCA7	0.002962	0.010488	0.636414	315	0.92535	0.92549	1	17420
SPARC	0.0029868	0.010572	0.637458	316	0.52506	0.54942	1	10384
AGRN	0.0029868	0.010572	0.637458	317	0.14659	0.2416	1	4596
CWF19L2	0.0030039	0.010637	0.639377	318	0.997	0.99702	1	18962
NUTM2A	0.0030491	0.010778	0.64174	319	0.19467	0.3017	1	5719
C1orf112	0.0030588	0.010809	0.64174	320	0.99694	0.99697	1	18961
NEIL2	0.0030653	0.010826	0.64174	321	0.28265	0.39905	1	7565
DTNA	0.0030667	0.010833	0.64174	322	0.41712	0.47669	1	8979
HEATR6	0.0030711	0.010845	0.64174	323	0.99693	0.99696	1	18960
ANAPC4	0.0030869	0.010903	0.642459	324	0.99691	0.99694	1	18959
CSF2RA	0.0030962	0.010938	0.642459	325	0.9969	0.99693	1	18958
SLC18A3	0.0031051	0.010972	0.642459	326	0.99689	0.99692	1	18957
SPIN3	0.0031113	0.010991	0.642459	327	0.65536	0.65644	1	12426
GPM6A	0.0031311	0.011063	0.644696	328	0.0656	0.13886	0.985644	2677
ISLR	0.0031566	0.011163	0.64712	329	0.11121	0.19705	0.994545	3764
LTC4S	0.0031593	0.011172	0.64712	330	0.99684	0.99687	1	18955
TMSB4X	0.00317	0.011215	0.647617	331	0.42472	0.48146	1	9075
MAEA	0.0032003	0.011319	0.651661	332	0.7317	0.73141	1	13845
RAD54L	0.0032128	0.011357	0.651904	333	0.62812	0.63189	1	11950
SNRNP40	0.0032359	0.011428	0.652795	334	0.96507	0.96512	1	18240
NKD1	0.0032485	0.011485	0.652795	335	0.94341	0.94353	1	17784
PTBP1	0.0032752	0.01158	0.652795	336	0.99672	0.99675	1	18954
CRISP1	0.0032856	0.011613	0.652795	337	0.99671	0.99674	1	18953
GBP6	0.00329	0.011625	0.652795	338	0.98735	0.98731	1	18722
DPH1	0.0033065	0.011676	0.652795	339	0.99669	0.99673	1	18952
FAM64A	0.0033157	0.011706	0.652795	340	0.20973	0.32053	1	6083
STMN1	0.0033276	0.011748	0.652795	341	0.51317	0.54078	1	10208
FAM173B	0.003345	0.011805	0.652795	342	0.99665	0.99669	1	18951
IFITM3	0.0033762	0.011908	0.652795	343	0.99662	0.99666	1	18950
SUCLG2	0.0033793	0.011919	0.652795	344	0.7665	0.76623	1	14466
RBMS1	0.0033928	0.011963	0.652795	345	0.59624	0.60473	1	11439
TMEM74	0.0034123	0.012033	0.652795	346	0.52641	0.5504	1	10400
NRBP2	0.0034153	0.012038	0.652795	347	0.99658	0.99662	1	18949
ATAD1	0.0034156	0.012039	0.652795	348	0.76855	0.76833	1	14508
BCL2L1	0.003421	0.012064	0.652795	349	0.5826	0.59355	1	11212
EXOC4	0.0034335	0.012105	0.652795	350	0.99657	0.9966	1	18948
SLC3A2	0.0034335	0.012105	0.652795	351	0.99657	0.9966	1	18947
ZNF785	0.0034442	0.012142	0.652795	352	0.81321	0.81316	1	15361
GRIN1	0.0034541	0.012171	0.652795	353	0.70285	0.70259	1	13297
MLLT11	0.0034578	0.012187	0.652795	354	0.61924	0.62413	1	11806
LRRC43	0.0034578	0.012187	0.652795	355	0.47641	0.51526	1	9725
NUP43	0.0034753	0.012256	0.652795	356	0.99652	0.99656	1	18946
C17orf104	0.0034894	0.012299	0.652795	357	0.96029	0.96032	1	18139
LRRC4B	0.0034911	0.012306	0.652795	358	0.99651	0.99654	1	18945
GTF2F1	0.0034937	0.012315	0.652795	359	0.75874	0.75848	1	14327
CYFIP2	0.0035009	0.01234	0.652795	360	0.9965	0.99653	1	18944
CADM3	0.003507	0.012361	0.652795	361	0.99649	0.99653	1	18943
SLC22A17	0.0035081	0.012363	0.652795	362	0.99649	0.99653	1	18942
MTA2	0.0035267	0.012424	0.652801	363	0.99647	0.9965	1	18941
GNA11	0.0035363	0.012455	0.652801	364	0.42204	0.47976	1	9039
SLC2A1	0.0035388	0.012466	0.652801	365	0.99646	0.99649	1	18940
C1D	0.0036214	0.012737	0.664621	366	0.99638	0.9964	1	18937
RC3H1	0.0036275	0.012761	0.664621	367	0.87504	0.87499	1	16509
MED11	0.0036415	0.012815	0.665613	368	0.96256	0.96258	1	18187
RBFOX2	0.003664	0.012886	0.667058	369	0.99326	0.99329	1	18864
ARSI	0.0036932	0.012987	0.667058	370	0.40655	0.47016	1	8847
SENP7	0.0036998	0.013011	0.667058	371	0.9963	0.99632	1	18936
MGAT4C	0.0037101	0.013042	0.667058	372	0.99629	0.9963	1	18935
SZRD1	0.0037455	0.013163	0.667058	373	0.19539	0.30258	1	5734
TXNDC8	0.0037505	0.013179	0.667058	374	0.032104	0.078606	0.95668	1558
FAM90A1	0.0037534	0.013187	0.667058	375	0.97893	0.97906	1	18534
ANAPC13	0.0037859	0.013296	0.667058	376	0.57384	0.58643	1	11085
NKAP	0.0037859	0.013296	0.667058	377	0.79666	0.79656	1	15052
HTATSF1	0.0037859	0.013296	0.667058	378	0.061755	0.13381	0.985644	2585
VCX	0.0037942	0.01332	0.667058	379	0.97566	0.97584	1	18460
MICALCL	0.0037979	0.013331	0.667058	380	0.95498	0.955	1	18035
PSMB6	0.0038332	0.013445	0.667058	381	0.2887	0.40222	1	7635
KIAA1147	0.0038587	0.013527	0.667058	382	0.076965	0.1534	0.986136	2965
CIC	0.0038722	0.013566	0.667058	383	0.89602	0.89596	1	16877
STRBP	0.0038801	0.013594	0.667058	384	0.99612	0.99612	1	18934
ATP9A	0.0038819	0.013596	0.667058	385	0.93584	0.93591	1	17633
ZNF546	0.0038916	0.013631	0.667058	386	0.81908	0.81902	1	15476
C12orf45	0.0039054	0.013674	0.667058	387	0.99609	0.99609	1	18933
NUGGC	0.003909	0.013684	0.667058	388	0.93332	0.93343	1	17582
MED28	0.0039091	0.013684	0.667058	389	0.41404	0.47476	1	8939
SEPSECS	0.0039226	0.013728	0.667058	390	0.98629	0.98625	1	18691
TFEC	0.0039284	0.013746	0.667058	391	0.10688	0.19144	0.994545	3670
OVCH2	0.0039309	0.013756	0.667058	392	0.99607	0.99606	1	18932
POLM	0.0039362	0.013777	0.667058	393	0.90214	0.90213	1	16985
C15orf26	0.0039511	0.01382	0.667058	394	0.99605	0.99604	1	18931
CDC34	0.0039596	0.013854	0.667058	395	0.90215	0.90214	1	16986
WDPCP	0.0039639	0.013869	0.667058	396	0.99604	0.99603	1	18930
APBA2	0.0039809	0.013934	0.667058	397	0.39282	0.46172	1	8704
RNF168	0.003983	0.013943	0.667058	398	0.83867	0.83854	1	15835
JSRP1	0.0039914	0.013973	0.667058	399	0.99601	0.996	1	18929
NEUROD4	0.003997	0.013994	0.667058	400	0.98836	0.98836	1	18760
APTX	0.0040525	0.014187	0.674066	401	0.99595	0.99593	1	18928
GRIA3	0.0040594	0.014212	0.674066	402	0.78712	0.78698	1	14854
KIAA1524	0.0041003	0.01435	0.678941	403	0.9959	0.99588	1	18927
SGTA	0.0041211	0.014419	0.679791	404	0.98593	0.98591	1	18680
VASP	0.0041264	0.014439	0.679791	405	0.88645	0.8864	1	16708
MED1	0.004161	0.014549	0.683253	406	0.96835	0.96841	1	18303
KDM6A	0.0041901	0.014642	0.685971	407	0.056393	0.12692	0.979976	2471
IKBKB	0.0042437	0.014824	0.692767	408	0.99576	0.99575	1	18925
CLDN15	0.0042554	0.014864	0.692961	409	0.98039	0.98046	1	18569
XKR5	0.0042686	0.014907	0.693274	410	0.57486	0.58727	1	11097
GOLIM4	0.0042901	0.014975	0.694298	411	0.99571	0.9957	1	18924
TRPC4	0.0043033	0.015022	0.694298	412	0.9957	0.99568	1	18923
PRLR	0.0043114	0.015042	0.694298	413	0.43244	0.48633	1	9173
ANKZF1	0.0043208	0.015074	0.694298	414	0.68086	0.68086	1	12854
FAM174B	0.0043783	0.015258	0.701054	415	0.99562	0.99561	1	18922
R3HDM4	0.0043993	0.015325	0.702224	416	0.939	0.93908	1	17700
ARF6	0.0044123	0.015357	0.702224	417	0.98458	0.98457	1	18647
ZNF586	0.0044308	0.015412	0.703077	418	0.97975	0.97986	1	18553
MEAF6	0.0044432	0.01546	0.703571	419	0.93312	0.93322	1	17577
COX6C	0.004486	0.01561	0.704706	420	0.99551	0.99551	1	18921
METTL25	0.0044866	0.015612	0.704706	421	0.57356	0.58621	1	11083
ARHGAP33	0.0044969	0.015647	0.704706	422	0.9955	0.99549	1	18920
CDK10	0.0044993	0.015653	0.704706	423	0.74555	0.74521	1	14100
MYO1F	0.0045038	0.015669	0.704706	424	0.4665	0.50853	1	9606
MYBL2	0.004538	0.015793	0.707098	425	0.99546	0.99545	1	18918
DHH	0.0045527	0.01584	0.707098	426	0.99545	0.99544	1	18917
TRIM8	0.0045971	0.015987	0.707098	427	0.22665	0.34149	1	6454
AKIRIN2	0.0045971	0.015987	0.707098	428	0.97083	0.97091	1	18374
SF3A3	0.0045971	0.015987	0.707098	429	0.62839	0.63212	1	11953
DNAJB6	0.0046026	0.016003	0.707098	430	0.9954	0.9954	1	18916
STAMBPL1	0.004604	0.016006	0.707098	431	0.9954	0.9954	1	18915
OR3A2	0.0046086	0.016018	0.707098	432	0.99539	0.99539	1	18914
ATP11C	0.0046594	0.016186	0.711863	433	0.8064	0.80631	1	15234
C7orf60	0.0046868	0.016275	0.711863	434	0.68158	0.68152	1	12869
ZDHHC24	0.0046868	0.016275	0.711863	435	0.0051333	0.016838	0.827287	380
CACNA1G	0.0046868	0.016275	0.711863	436	0.14938	0.2451	1	4669
LTA	0.0047046	0.016342	0.713154	437	0.91528	0.91533	1	17251
CEP85L	0.0047219	0.016408	0.714394	438	0.99528	0.99528	1	18913
ZBTB7B	0.0047708	0.016586	0.720511	439	0.99523	0.99522	1	18912
PLEKHA7	0.0048072	0.016711	0.722247	440	0.32689	0.42315	1	8013
VPS4B	0.0048118	0.016725	0.722247	441	0.99519	0.99519	1	18911
PEX10	0.0048175	0.016739	0.722247	442	0.6892	0.68903	1	13003
GLIS2	0.004856	0.016864	0.725097	443	0.4698	0.51073	1	9651
SLC25A37	0.0048628	0.016881	0.725097	444	0.99514	0.99515	1	18910
KRI1	0.0048841	0.016958	0.725275	445	0.99512	0.99513	1	18909
TDP1	0.0048907	0.016979	0.725275	446	0.42075	0.4789	1	9028
TAF9	0.0048959	0.017001	0.725275	447	0.98981	0.98978	1	18792
CRLF3	0.0049084	0.017037	0.725275	448	0.99509	0.9951	1	18908
ZNF594	0.0049438	0.013635	0.667058	449	0.99506	0.99519	1	18907
ADAMTS12	0.0049557	0.017188	0.725593	450	0.97404	0.97417	1	18437
CPA1	0.0049621	0.01721	0.725593	451	0.99504	0.99505	1	18906
OIP5	0.0049726	0.017244	0.725593	452	0.17444	0.27656	1	5264
E2F8	0.0049743	0.01725	0.725593	453	0.97987	0.97997	1	18557
IZUMO2	0.0049743	0.01725	0.725593	454	0.42145	0.47937	1	9033
RMI2	0.004982	0.017276	0.725593	455	0.9944	0.99442	1	18894
ADRA1A	0.0050058	0.017347	0.725593	456	0.50264	0.53336	1	10058
PROSC	0.0050112	0.017363	0.725593	457	0.67512	0.67523	1	12751
VEZT	0.0050181	0.017386	0.725593	458	0.037315	0.089943	0.95668	1790
C14orf142	0.0050599	0.017529	0.728055	459	0.99494	0.99495	1	18905
SHCBP1	0.0050648	0.017547	0.728055	460	0.93018	0.93031	1	17517
RGS19	0.0050752	0.017586	0.728055	461	0.97133	0.97145	1	18386
TMEM117	0.0050788	0.017598	0.728055	462	0.72763	0.72738	1	13768
DNAJA3	0.0051295	0.017761	0.7303	463	0.99487	0.99487	1	18904
C9orf142	0.0051345	0.017772	0.7303	464	0.99487	0.99487	1	18903
ANAPC15	0.0051399	0.017787	0.7303	465	0.77873	0.77843	1	14690
ERF	0.005182	0.017926	0.7303	466	0.30355	0.41027	1	7775
TMEM161B	0.0052017	0.017998	0.7303	467	0.9948	0.9948	1	18902
DNAJC25	0.0052092	0.018027	0.7303	468	0.79643	0.79634	1	15044
FAM160A2	0.0052095	0.018028	0.7303	469	0.91924	0.91931	1	17315
IMMT	0.0052243	0.018071	0.7303	470	0.98477	0.98477	1	18654
CDKN2B	0.0052305	0.018094	0.7303	471	0.97827	0.97843	1	18519
GNE	0.0052617	0.018206	0.7303	472	0.61169	0.61764	1	11683
CCDC18	0.0052712	0.01823	0.7303	473	0.04732	0.11113	0.966195	2186
ABI1	0.0052749	0.018242	0.7303	474	0.93131	0.93147	1	17538
SCAF4	0.0052775	0.018252	0.7303	475	0.83198	0.83196	1	15706
RANBP2	0.0052972	0.018321	0.7303	476	0.079581	0.15679	0.987214	3028
EN1	0.0053141	0.018373	0.7303	477	0.90634	0.90634	1	17063
TUBB	0.0053141	0.018373	0.7303	478	0.79087	0.79075	1	14933
NAB1	0.0053185	0.018387	0.7303	479	0.99468	0.9947	1	18901
CENPU	0.0053204	0.018395	0.7303	480	0.95729	0.95728	1	18070
CASC5	0.0053267	0.018416	0.7303	481	0.31658	0.4175	1	7911
GPR50	0.0053446	0.018473	0.7303	482	0.80826	0.80815	1	15270
BEST2	0.0053662	0.01854	0.7303	483	0.0058356	0.018543	0.827711	426
ALDH3B1	0.0053662	0.01854	0.7303	484	0.71063	0.7103	1	13439
SHCBP1L	0.0053662	0.01854	0.7303	485	0.95786	0.95788	1	18082
ARAP3	0.0053761	0.018569	0.7303	486	0.98952	0.98949	1	18783
PAX2	0.0053959	0.018629	0.731179	487	0.9946	0.99463	1	18900
PRR7	0.0054176	0.018708	0.732765	488	0.9787	0.97885	1	18531
ACHE	0.0054403	0.018798	0.734427	489	0.16278	0.26192	1	4987
SMYD2	0.0054707	0.018896	0.734427	490	0.79476	0.79468	1	15017
MKKS	0.0054836	0.018934	0.734427	491	0.87468	0.87461	1	16505
AHCYL1	0.0054868	0.018943	0.734427	492	0.75753	0.75732	1	14305
SLC26A3	0.0054932	0.018979	0.734427	493	0.99451	0.99453	1	18898
CLK3	0.0054942	0.018981	0.734427	494	0.99451	0.99453	1	18897
PLXNB2	0.0055064	0.019021	0.734483	495	0.27962	0.39742	1	7538
SH3GL3	0.0055639	0.01919	0.738013	496	0.21136	0.32257	1	6118
GPBP1L1	0.0055729	0.019218	0.738013	497	0.25683	0.37869	1	7179
SMAD6	0.0055794	0.019246	0.738013	498	0.99442	0.99444	1	18896
C5orf49	0.0055928	0.019287	0.738013	499	0.99441	0.99443	1	18895
MAPKAPK3	0.0056274	0.019408	0.738013	500	0.14785	0.24318	1	4633
PON2	0.0056274	0.019408	0.738013	501	0.53815	0.55902	1	10576
TCF24	0.0056672	0.019537	0.738013	502	0.99433	0.99436	1	18892
RBM17	0.005677	0.019564	0.738013	503	0.4097	0.47205	1	8887
TPST2	0.005691	0.01961	0.738013	504	0.87875	0.87871	1	16574
BMPR2	0.0056976	0.019631	0.738013	505	0.83761	0.83752	1	15811
SNRNP48	0.0057047	0.019651	0.738013	506	8.7243e-05	0.00034524	0.419417	15
C9orf116	0.0057047	0.019651	0.738013	507	0.12034	0.20855	0.9955	3995
ZNF574	0.0057052	0.019653	0.738013	508	0.99429	0.99433	1	18890
MCM2	0.0057052	0.019653	0.738013	509	0.99429	0.99433	1	18891
CPA5	0.0057227	0.019718	0.739012	510	0.99428	0.99431	1	18889
MCMBP	0.0057374	0.019765	0.739329	511	0.99426	0.99429	1	18888
GOLGA6B	0.0057841	0.019901	0.741503	512	0.056142	0.12657	0.979491	2466
IGDCC4	0.0057841	0.019901	0.741503	513	0.53339	0.55543	1	10498
KRT1	0.0058002	0.019957	0.742026	514	0.99372	0.99375	1	18879
DDX11	0.0058121	0.019993	0.742026	515	0.85644	0.85633	1	16174
VPS26B	0.0058364	0.020072	0.743505	516	0.080009	0.15733	0.987214	3041
GAR1	0.0058581	0.020145	0.744786	517	0.78457	0.78442	1	14802
RNF4	0.0058886	0.020253	0.746955	518	0.95462	0.95464	1	18024
PLCG1	0.005901	0.020294	0.746955	519	0.9941	0.99414	1	18887
ZNF654	0.005911	0.020332	0.746955	520	0.69081	0.69066	1	13031
ZNF226	0.0059202	0.02036	0.746955	521	0.48794	0.52314	1	9860
FAM98A	0.0059418	0.020446	0.746997	522	0.46962	0.51062	1	9648
CNPY4	0.0059559	0.020489	0.746997	523	0.99404	0.99409	1	18886
SFXN3	0.0059655	0.020518	0.746997	524	0.51018	0.53865	1	10154
INMT	0.0059655	0.020518	0.746997	525	0.38316	0.45583	1	8594
RNF112	0.0060192	0.02072	0.747916	526	0.24139	0.35961	1	6796
GHRL	0.0060192	0.02072	0.747916	527	0.005151	0.016871	0.827287	383
VMA21	0.0060192	0.02072	0.747916	528	0.71955	0.71929	1	13623
S100A10	0.0060203	0.020721	0.747916	529	0.99398	0.99403	1	18884
ZNRF2	0.0060294	0.020755	0.747916	530	0.99397	0.99402	1	18883
HLTF	0.0060345	0.020778	0.747916	531	0.54185	0.5618	1	10625
TMEM82	0.0060798	0.020923	0.750367	532	0.50381	0.53418	1	10069
ZBTB1	0.0060806	0.020924	0.750367	533	0.99392	0.99396	1	18882
MYO1A	0.006116	0.021026	0.751189	534	0.42447	0.4813	1	9070
CBWD5	0.006116	0.021026	0.751189	535	0.83261	0.83258	1	15721
CREB3L1	0.0061497	0.021138	0.75236	536	0.44909	0.49704	1	9377
KIAA1429	0.0061593	0.02117	0.75236	537	0.9794	0.97953	1	18544
C2CD3	0.006169	0.021204	0.75236	538	0.16566	0.26556	1	5059
COL8A2	0.0062019	0.021304	0.75236	539	0.56562	0.58003	1	10952
PODN	0.0062045	0.021313	0.75236	540	0.94526	0.94527	1	17825
PIANP	0.0062342	0.021414	0.75236	541	0.38382	0.45625	1	8604
CEP44	0.0062541	0.021478	0.75236	542	0.99008	0.99005	1	18797
SPDYA	0.0062561	0.021482	0.75236	543	0.99374	0.99378	1	18881
KIAA1217	0.006261	0.021498	0.75236	544	0.07341	0.14887	0.985644	2870
TMEM217	0.0062631	0.021502	0.75236	545	0.99374	0.99377	1	18880
PDC	0.0062707	0.021525	0.75236	546	0.68886	0.68869	1	12995
NYAP1	0.0062894	0.021579	0.75236	547	0.99371	0.99374	1	18878
TTC25	0.0063035	0.021621	0.75236	548	0.9937	0.99373	1	18877
OR1F1	0.0063063	0.021631	0.75236	549	0.39552	0.46339	1	8731
SLC25A14	0.0063335	0.021716	0.75236	550	0.99367	0.9937	1	18876
EHF	0.0063529	0.021783	0.75236	551	0.054533	0.12454	0.975179	2435
MUC16	0.0063736	0.021851	0.75236	552	0.99363	0.99365	1	18875
ZNF804A	0.0063855	0.021893	0.75236	553	0.99361	0.99365	1	18874
NECAB1	0.0063855	0.021893	0.75236	554	0.59216	0.6014	1	11362
POP4	0.0063991	0.021934	0.75236	555	0.9936	0.99363	1	18873
MED7	0.0064108	0.021974	0.75236	556	0.013284	0.036219	0.902479	764
PIGR	0.0064108	0.021974	0.75236	557	0.53349	0.55552	1	10500
KCTD16	0.0064108	0.021974	0.75236	558	0.34193	0.43173	1	8162
JARID2	0.0064224	0.022003	0.75236	559	0.22804	0.3432	1	6484
SCNN1A	0.0064346	0.022048	0.752555	560	0.9473	0.94736	1	17879
RBPJL	0.0064618	0.022136	0.753186	561	0.89344	0.89336	1	16839
PAXIP1	0.0064844	0.0222	0.753186	562	0.99352	0.99355	1	18872
SLBP	0.0065156	0.022307	0.753186	563	0.99348	0.99352	1	18871
MICAL2	0.0065558	0.022437	0.753186	564	0.13642	0.2288	1	4347
TSPYL2	0.006556	0.022437	0.753186	565	0.99344	0.99348	1	18869
DHDDS	0.006556	0.022437	0.753186	566	0.99344	0.99348	1	18870
GRIA2	0.0065674	0.022475	0.753186	567	0.58398	0.59471	1	11229
NCS1	0.0065674	0.022475	0.753186	568	0.32888	0.4243	1	8037
MATR3	0.006568	0.022475	0.753186	569	0.7514	0.75117	1	14191
SHROOM2	0.0065793	0.022509	0.753186	570	0.77716	0.77688	1	14666
SRP72	0.0065832	0.022523	0.753186	571	0.34812	0.43524	1	8231
NXPH3	0.006607	0.022597	0.753186	572	0.44438	0.49396	1	9315
NOL11	0.0066231	0.022652	0.753186	573	0.81415	0.81408	1	15377
IL1F10	0.0066231	0.022652	0.753186	574	0.62852	0.63225	1	11956
MED8	0.0066307	0.02268	0.753186	575	0.99337	0.99341	1	18868
BABAM1	0.0066783	0.022836	0.753186	576	0.90404	0.90404	1	17025
SYT6	0.0066938	0.022896	0.753186	577	0.96595	0.966	1	18256
PEA15	0.0066979	0.022909	0.753186	578	0.43333	0.48691	1	9183
LEMD3	0.0066979	0.022909	0.753186	579	0.45753	0.50262	1	9487
PIGL	0.006709	0.022941	0.753186	580	0.99329	0.99332	1	18867
ODF1	0.0067201	0.022982	0.753186	581	0.99328	0.99331	1	18866
OR52E2	0.0067238	0.022998	0.753186	582	0.99328	0.9933	1	18865
PLAU	0.0067258	0.023005	0.753186	583	0.13662	0.22907	1	4352
DSN1	0.0067757	0.023178	0.753186	584	0.99322	0.99325	1	18863
CSNK1D	0.0067781	0.023184	0.753186	585	0.99322	0.99325	1	18862
PSMB2	0.0067824	0.023192	0.753186	586	0.83525	0.83521	1	15777
WDFY2	0.0068023	0.023253	0.753186	587	0.65591	0.65696	1	12434
LIG3	0.0068023	0.023253	0.753186	588	0.97823	0.97839	1	18518
BIRC8	0.0068104	0.023282	0.753186	589	0.99319	0.99322	1	18860
IRS1	0.0068115	0.023286	0.753186	590	0.54386	0.56329	1	10654
DUSP4	0.0068254	0.02332	0.753186	591	0.93445	0.93455	1	17600
SPATA31A5	0.0068285	0.023328	0.753186	592	0.99317	0.9932	1	18859
CCDC88A	0.0068691	0.02345	0.754593	593	0.99313	0.99315	1	18858
AP2M1	0.006877	0.023476	0.754593	594	0.005993	0.018959	0.829248	437
ATG12	0.0068805	0.02349	0.754593	595	0.678	0.67802	1	12803
BIN1	0.0068941	0.023529	0.754593	596	0.99311	0.99313	1	18857
PNMAL1	0.0069432	0.023678	0.756559	597	0.99306	0.99307	1	18856
ADAP1	0.0069588	0.023725	0.756559	598	0.59116	0.60058	1	11344
CNOT2	0.0069608	0.023735	0.756559	599	0.75488	0.75468	1	14253
C1orf50	0.0069641	0.023749	0.756559	600	0.86272	0.8626	1	16283
HEY2	0.0069989	0.023876	0.758414	601	0.993	0.99302	1	18855
CDC73	0.007028	0.023966	0.758414	602	0.51242	0.54026	1	10196
MBD3L5	0.0070693	0.024101	0.758414	603	0.052817	0.12227	0.970796	2400
TAF1A	0.0070693	0.024101	0.758414	604	0.98999	0.98996	1	18796
SPRR2E	0.0070747	0.024122	0.758414	605	0.99293	0.99295	1	18852
LETM1	0.0070811	0.024143	0.758414	606	0.99292	0.99295	1	18851
TMEM25	0.0071129	0.024252	0.758414	607	0.049948	0.11663	0.967136	2298
BFSP2	0.0071154	0.024261	0.758414	608	0.25028	0.3706	1	7011
PPT2	0.0071154	0.024261	0.758414	609	0.11471	0.20144	0.994545	3853
ZNF707	0.0071154	0.024261	0.758414	610	0.68822	0.68804	1	12983
FAM168B	0.0071154	0.024261	0.758414	611	0.92475	0.9249	1	17407
SCGB2B2	0.0071422	0.024355	0.758414	612	0.99286	0.99289	1	18850
TOR1B	0.007166	0.024431	0.758414	613	0.99283	0.99286	1	18849
TSLP	0.007166	0.024431	0.758414	614	0.99283	0.99286	1	18848
KLHL15	0.0071692	0.024442	0.758414	615	0.99257	0.9926	1	18843
SNRPB	0.0071693	0.024442	0.758414	616	0.99283	0.99285	1	18847
BRIP1	0.0072203	0.024594	0.761616	617	0.8515	0.85135	1	16084
MECR	0.0072426	0.024663	0.761616	618	0.99276	0.99279	1	18845
CD151	0.0072719	0.024758	0.761616	619	0.81158	0.81149	1	15334
TBX10	0.0072719	0.024758	0.761616	620	0.1164	0.20354	0.994545	3897
ADIG	0.0072979	0.024844	0.761616	621	0.93665	0.93672	1	17653
TMEM190	0.0073056	0.024867	0.761616	622	0.74938	0.74907	1	14158
TET3	0.0073657	0.025046	0.761616	623	0.96931	0.96936	1	18327
MOAP1	0.0073657	0.025046	0.761616	624	0.236	0.35306	1	6679
DNPEP	0.0073803	0.025092	0.761616	625	0.99262	0.99265	1	18844
ZADH2	0.0073841	0.025101	0.761616	626	0.038029	0.091428	0.95668	1815
CCL26	0.0074023	0.02516	0.761616	627	0.71063	0.7103	1	13438
COX8C	0.0074023	0.02516	0.761616	628	0.60887	0.61523	1	11637
CFAP20	0.0074023	0.02516	0.761616	629	0.38662	0.45794	1	8633
NUTM2F	0.0074289	0.025245	0.761616	630	0.73613	0.7357	1	13930
AQP5	0.0074421	0.025281	0.761616	631	0.91857	0.91861	1	17300
NDUFAB1	0.0074469	0.025298	0.761616	632	0.21381	0.32561	1	6177
PTGER4	0.0074469	0.025298	0.761616	633	0.98698	0.98692	1	18711
DENND4C	0.0074632	0.025357	0.761616	634	0.646	0.64785	1	12259
MYO10	0.0074737	0.025392	0.761616	635	0.89968	0.89965	1	16934
PPP2R5D	0.007487	0.025435	0.761616	636	0.062905	0.13528	0.985644	2609
LGR5	0.0075002	0.025482	0.761616	637	0.88788	0.88782	1	16735
ERCC6L	0.007516	0.02553	0.761616	638	0.93113	0.93128	1	17535
DGCR14	0.0075692	0.02569	0.761616	639	0.76579	0.76549	1	14454
THAP6	0.0075744	0.025705	0.761616	640	0.99243	0.99245	1	18842
HLCS	0.0075797	0.025719	0.761616	641	0.99242	0.99244	1	18841
C4orf46	0.0075849	0.025738	0.761616	642	0.34128	0.43137	1	8153
TVP23C	0.0076065	0.025804	0.761616	643	0.97703	0.97723	1	18495
USP48	0.0076114	0.025819	0.761616	644	0.83493	0.83492	1	15768
BOD1	0.0076182	0.025833	0.761616	645	0.77421	0.77393	1	14608
IL18R1	0.0076634	0.025966	0.761616	646	0.7299	0.72959	1	13810
PCDHGA3	0.0076657	0.025972	0.761616	647	0.98508	0.98506	1	18663
TRIB1	0.0076745	0.025992	0.761616	648	0.99233	0.99235	1	18840
TNFSF15	0.0076759	0.025998	0.761616	649	0.99232	0.99235	1	18839
BIRC2	0.0076854	0.026026	0.761616	650	0.99231	0.99234	1	18838
CCDC144A	0.0076892	0.026034	0.761616	651	0.019269	0.050134	0.932308	1026
SLC25A25	0.0076892	0.026034	0.761616	652	0.12951	0.22004	0.999968	4205
TMED2	0.007712	0.026107	0.761616	653	0.99229	0.99231	1	18837
SLC9A3	0.0077215	0.026139	0.761616	654	0.85135	0.8512	1	16079
GSTA4	0.0077441	0.026212	0.761616	655	0.99226	0.99228	1	18836
EOMES	0.0077455	0.026216	0.761616	656	0.99225	0.99228	1	18835
SLC26A6	0.0077457	0.026219	0.761616	657	0.97611	0.97631	1	18473
SORD	0.0077674	0.026295	0.762669	658	0.35935	0.4418	1	8339
VAV2	0.0078196	0.026463	0.766389	659	0.98806	0.98806	1	18745
RBM14-RBM4	0.0078598	0.026589	0.768146	660	0.99214	0.99216	1	18834
POLL	0.0078753	0.026638	0.768146	661	0.96624	0.9663	1	18261
SERPINB1	0.0078827	0.026658	0.768146	662	0.99212	0.99213	1	18833
GYLTL1B	0.0078978	0.02671	0.768146	663	0.29358	0.40483	1	7675
HSPH1	0.0079024	0.026725	0.768146	664	0.72943	0.72914	1	13800
AMY2B	0.0079383	0.02683	0.77001	665	0.99206	0.99208	1	18832
C14orf1	0.007976	0.026952	0.770818	666	0.43641	0.48882	1	9225
BPI	0.0080004	0.027027	0.770818	667	0.98065	0.9807	1	18572
KDM7A	0.0080034	0.027032	0.770818	668	0.992	0.99202	1	18831
TIMP2	0.0080195	0.027085	0.770818	669	0.013232	0.036098	0.902479	760
AKR1C2	0.0080416	0.027161	0.770818	670	0.83033	0.83032	1	15673
DCK	0.0080428	0.027167	0.770818	671	0.99196	0.99197	1	18830
C4A	0.0080542	0.027199	0.770818	672	0.51202	0.53997	1	10188
ANKRD34A	0.0080606	0.027221	0.770818	673	0.92633	0.92648	1	17443
C15orf40	0.0080606	0.027221	0.770818	674	0.53503	0.55665	1	10525
NOLC1	0.0080989	0.027352	0.77187	675	0.0088622	0.025812	0.865837	565
FANCB	0.0080989	0.027352	0.77187	676	0.9168	0.91685	1	17272
NMI	0.0081325	0.027451	0.77187	677	0.047421	0.11135	0.966195	2191
CCDC81	0.0081694	0.027572	0.77187	678	0.93824	0.93829	1	17684
ATM	0.0081789	0.027598	0.77187	679	0.43893	0.49043	1	9255
EIF3H	0.008186	0.027619	0.77187	680	0.99181	0.99183	1	18829
RBMY1D	0.0081871	0.02762	0.77187	681	0.057798	0.12868	0.9811	2503
PRPS2	0.0082046	0.027686	0.77187	682	0.9918	0.99182	1	18828
FRAT2	0.0082107	0.027701	0.77187	683	0.98455	0.98453	1	18645
GNG11	0.0082107	0.027701	0.77187	684	0.20744	0.31768	1	6032
TCF4	0.0082202	0.027726	0.77187	685	0.62969	0.63327	1	11976
ATG7	0.0082692	0.027891	0.77187	686	0.99173	0.99175	1	18827
C4orf27	0.0082706	0.027893	0.77187	687	0.99173	0.99175	1	18826
PAPOLA	0.0082784	0.027913	0.77187	688	0.94337	0.94348	1	17782
PSMC3IP	0.0082864	0.027942	0.77187	689	0.99171	0.99174	1	18825
IL6	0.0083006	0.027985	0.77187	690	0.094378	0.17569	0.989014	3384
OR9G1	0.0083008	0.027985	0.77187	691	0.9917	0.99173	1	18824
WDR72	0.0083671	0.028196	0.774199	692	0.24992	0.37014	1	7003
C2orf74	0.0083671	0.028196	0.774199	693	0.86499	0.86487	1	16316
ABCD3	0.0083671	0.028196	0.774199	694	0.67356	0.67369	1	12730
ELP4	0.0083841	0.028246	0.774199	695	0.54403	0.56342	1	10656
ADGRV1	0.0083925	0.028272	0.774199	696	0.076792	0.15318	0.986136	2961
TLCD2	0.0084205	0.02836	0.775485	697	0.88789	0.88783	1	16736
MAB21L2	0.0084569	0.028486	0.777829	698	0.046557	0.10955	0.966195	2158
MEPCE	0.0084695	0.028527	0.777835	699	0.99153	0.99156	1	18823
TGS1	0.0085135	0.028663	0.780436	700	0.99149	0.99152	1	18822
FZR1	0.0085495	0.028785	0.781524	701	0.91868	0.91873	1	17302
ZSCAN20	0.0085495	0.028785	0.781524	702	0.90276	0.90275	1	16998
GALNT15	0.0085888	0.028914	0.783927	703	0.83758	0.8375	1	15810
MAN1A1	0.0086287	0.029053	0.78421	704	0.96396	0.964	1	18214
SPATS2	0.0086317	0.029066	0.78421	705	0.99137	0.9914	1	18821
MRPL42	0.0086388	0.029088	0.78421	706	0.70061	0.70037	1	13239
SNAPC5	0.0086399	0.029089	0.78421	707	0.99136	0.99138	1	18820
RPL36AL	0.0086797	0.02923	0.784702	708	0.92214	0.92229	1	17373
GGA3	0.0086798	0.02923	0.784702	709	0.18085	0.28447	1	5399
NEUROD2	0.0086798	0.02923	0.784702	710	0.25688	0.37875	1	7180
CTAGE15	0.0087137	0.029345	0.785711	711	0.095595	0.17722	0.989014	3420
MRGPRX3	0.0087234	0.029372	0.785711	712	0.99128	0.9913	1	18819
NICN1	0.0087422	0.029432	0.785711	713	0.6644	0.66488	1	12577
HEATR5B	0.0087422	0.029432	0.785711	714	0.5709	0.58411	1	11040
C2orf44	0.0087873	0.02959	0.787991	715	0.99121	0.99124	1	18818
GSS	0.0087912	0.0296	0.787991	716	0.99016	0.99013	1	18799
FAM107B	0.0088537	0.029789	0.788264	717	0.99115	0.99116	1	18817
HN1	0.008859	0.029804	0.788264	718	0.99114	0.99115	1	18816
SLC35G5	0.0088851	0.029887	0.788264	719	0.9782	0.97836	1	18517
CARKD	0.0088851	0.029887	0.788264	720	0.71399	0.71362	1	13515
JCHAIN	0.0088969	0.029924	0.788264	721	0.9911	0.99111	1	18815
ACTBL2	0.0088994	0.029931	0.788264	722	0.99087	0.99087	1	18812
SLC15A1	0.0089029	0.029945	0.788264	723	0.95143	0.95149	1	17970
TRIM13	0.0089143	0.029986	0.788264	724	0.66146	0.66212	1	12532
MAGEA6	0.0089143	0.029986	0.788264	725	0.20466	0.31415	1	5959
GATA2	0.0089281	0.030023	0.788264	726	0.99107	0.99108	1	18814
PAPD7	0.0089991	0.030261	0.789504	727	0.76725	0.76702	1	14476
TTLL11	0.0090185	0.03032	0.789504	728	0.14075	0.23427	1	4462
DDX59	0.009023	0.030339	0.789504	729	0.99098	0.99098	1	18813
GID8	0.0090378	0.030381	0.789504	730	0.083125	0.16133	0.989014	3110
RHOB	0.0090771	0.030515	0.789504	731	0.43422	0.48748	1	9193
ARHGDIA	0.0090812	0.030526	0.789504	732	0.35573	0.43966	1	8305
TEK	0.0091044	0.030596	0.789504	733	0.36205	0.44339	1	8369
BCAM	0.0091175	0.030626	0.789504	734	0.90953	0.90952	1	17131
DNAJC5B	0.0091334	0.03069	0.789504	735	0.94188	0.94197	1	17758
PRMT3	0.0091352	0.030694	0.789504	736	0.988	0.98801	1	18742
RNF103-CHMP3	0.0091356	0.030695	0.789504	737	0.99086	0.99086	1	18811
SUSD2	0.0091488	0.03073	0.789504	738	0.80885	0.80874	1	15283
ZNF540	0.0091488	0.03073	0.789504	739	0.075124	0.15104	0.985644	2921
LLPH	0.0091488	0.03073	0.789504	740	0.57685	0.58887	1	11131
NCAN	0.0091488	0.03073	0.789504	741	0.87869	0.87865	1	16573
NCKAP1	0.0091491	0.030731	0.789504	742	0.18069	0.28428	1	5396
AFMID	0.009191	0.030871	0.791145	743	0.91601	0.91607	1	17262
TUBB8	0.0092025	0.030917	0.791145	744	0.96975	0.96979	1	18343
ZSCAN22	0.0092033	0.030919	0.791145	745	0.48839	0.52343	1	9867
ZSCAN23	0.0092445	0.031055	0.793568	746	0.98625	0.98621	1	18688
DMTN	0.0093145	0.031274	0.798087	747	0.38016	0.45402	1	8563
NCR2	0.0093561	0.031408	0.798149	748	0.99064	0.99063	1	18810
CALHM3	0.0093571	0.031411	0.798149	749	0.62682	0.63069	1	11932
MTM1	0.0093688	0.031451	0.798149	750	0.99063	0.99062	1	18809
UBXN8	0.0093854	0.031502	0.798149	751	0.99061	0.99061	1	18808
DAP	0.0093997	0.031547	0.798149	752	0.97398	0.97412	1	18434
AK5	0.0094044	0.03156	0.798149	753	0.9906	0.99059	1	18807
DYRK2	0.0094067	0.031569	0.798149	754	0.99059	0.99058	1	18806
KRTAP19-6	0.0094353	0.031653	0.799227	755	0.14449	0.23898	1	4540
PTTG2	0.0094605	0.031735	0.800249	756	0.9092	0.90919	1	17124
C15orf54	0.0094864	0.031819	0.800425	757	0.9716	0.97172	1	18393
RGS9BP	0.0094926	0.031841	0.800425	758	0.99051	0.9905	1	18805
PRR13	0.0095022	0.031868	0.800425	759	0.9905	0.99049	1	18804
SENP1	0.0095149	0.031911	0.800453	760	0.79418	0.79412	1	15007
C20orf173	0.0095395	0.031987	0.80076	761	0.25013	0.37042	1	7009
KPNA4	0.0095565	0.032039	0.80076	762	0.68523	0.68513	1	12931
HSD17B11	0.0095624	0.032061	0.80076	763	0.076866	0.15326	0.986136	2962
BMP2K	0.0095743	0.032106	0.80076	764	0.32244	0.42068	1	7964
TREH	0.009584	0.032133	0.80076	765	0.61238	0.61824	1	11695
MYPN	0.0096324	0.032283	0.801267	766	0.90041	0.90037	1	16949
RPS6KA4	0.0096436	0.032321	0.801267	767	0.40861	0.47136	1	8871
CD44	0.0096436	0.032321	0.801267	768	0.96892	0.96897	1	18318
NAP1L4	0.0096436	0.032321	0.801267	769	0.57869	0.59036	1	11153
MAP3K7	0.0096823	0.032447	0.802691	770	0.81903	0.81898	1	15474
C1orf27	0.0096875	0.032462	0.802691	771	0.56775	0.58165	1	10988
NKAIN2	0.0097375	0.032631	0.805177	772	0.90115	0.90113	1	16964
ATP6V0D1	0.0097653	0.02621	0.761616	773	0.99023	0.99036	1	18802
EHBP1	0.0097749	0.032742	0.805177	774	0.99023	0.99021	1	18801
HDLBP	0.0097774	0.032751	0.805177	775	0.056644	0.12725	0.980441	2476
ZNF296	0.0097998	0.032815	0.805177	776	0.90218	0.90217	1	16987
SMEK1	0.0097998	0.032815	0.805177	777	0.7097	0.70935	1	13418
CNKSR3	0.0097998	0.032815	0.805177	778	0.47048	0.5112	1	9661
TRIM28	0.0098288	0.032913	0.806195	779	0.99017	0.99015	1	18800
FAM210A	0.0098394	0.032941	0.806195	780	0.25131	0.37185	1	7042
TSPAN2	0.0098616	0.033002	0.806658	781	0.086119	0.16516	0.989014	3183
TM9SF2	0.0098871	0.033082	0.807563	782	0.99011	0.99009	1	18798
TMPRSS11A	0.009904	0.033137	0.807872	783	0.5186	0.5447	1	10287
SPRED2	0.0099946	0.033417	0.810532	784	0.97668	0.97689	1	18485
MMP8	0.010001	0.033432	0.810532	785	0.6606	0.66133	1	12517
PARPBP	0.010008	0.033458	0.810532	786	0.46359	0.50665	1	9564
MAGOHB	0.010008	0.033458	0.810532	787	0.050635	0.11809	0.967271	2324
ATG4A	0.010033	0.033537	0.811436	788	0.8717	0.87163	1	16442
PEPD	0.010064	0.033638	0.812062	789	0.98994	0.9899	1	18795
RETSAT	0.010075	0.033665	0.812062	790	0.98992	0.98989	1	18794
ANO1	0.010086	0.033698	0.812062	791	0.029235	0.072358	0.95668	1434
EPB41L2	0.010112	0.033776	0.812062	792	0.57719	0.58916	1	11139
OR1N2	0.010165	0.033944	0.812167	793	0.77219	0.77194	1	14575
HIST1H1C	0.01019	0.034025	0.812167	794	0.45544	0.50127	1	9455
UFM1	0.01019	0.034025	0.812167	795	0.73102	0.73072	1	13833
PPP2R3B	0.010237	0.034171	0.812167	796	0.98976	0.98972	1	18791
MRPL45	0.010265	0.034263	0.812167	797	0.98974	0.9897	1	18789
PCDHA8	0.010266	0.034265	0.812167	798	0.81142	0.81133	1	15328
DRC1	0.010268	0.034271	0.812167	799	0.15988	0.25828	1	4919
DLG4	0.010275	0.034295	0.812167	800	0.6131	0.61886	1	11713
SEMA6B	0.010275	0.034295	0.812167	801	0.012401	0.034192	0.900888	723
WFDC5	0.010321	0.034451	0.812167	802	0.98968	0.98964	1	18788
SNRPC	0.010321	0.034451	0.812167	803	0.98968	0.98964	1	18785
HAUS1	0.010321	0.034451	0.812167	804	0.98968	0.98964	1	18786
NAA25	0.010321	0.034451	0.812167	805	0.98968	0.98964	1	18787
SERPINB12	0.010325	0.034463	0.812167	806	0.89695	0.89689	1	16886
LBHD1	0.010336	0.034504	0.812167	807	0.54338	0.56294	1	10646
GRID1	0.01034	0.034516	0.812167	808	0.43709	0.48926	1	9233
DEFB108B	0.010346	0.034545	0.812167	809	0.98898	0.98896	1	18771
CRACR2B	0.010381	0.034652	0.812322	810	0.762	0.76174	1	14381
B3GNT6	0.010381	0.034652	0.812322	811	0.95045	0.95051	1	17956
OR8H1	0.010398	0.034718	0.812322	812	0.9896	0.98957	1	18784
CCDC168	0.010423	0.034807	0.812322	813	0.6188	0.62374	1	11799
CDCA5	0.010423	0.034807	0.812322	814	0.98253	0.98255	1	18604
PPP1CB	0.010423	0.034807	0.812322	815	0.87436	0.8743	1	16495
FAM83H	0.010429	0.027913	0.77187	816	0.5428	0.54421	1	10637
MVP	0.010477	0.034969	0.813223	817	0.075086	0.15099	0.985644	2920
TTLL2	0.010481	0.034985	0.813223	818	0.98952	0.98949	1	18782
LYPD8	0.010522	0.035119	0.813223	819	0.91094	0.91091	1	17157
ATP8B4	0.010536	0.035164	0.813223	820	0.74466	0.74431	1	14082
TMEM161A	0.010557	0.035223	0.813223	821	0.66464	0.66509	1	12581
MAG	0.010565	0.035246	0.813223	822	0.9515	0.95155	1	17973
ENDOD1	0.010601	0.035354	0.813223	823	0.9894	0.98938	1	18781
BCR	0.010605	0.035363	0.813223	824	0.79193	0.79182	1	14955
BAG4	0.010622	0.035423	0.813223	825	0.57627	0.58841	1	11123
DLX5	0.010656	0.035524	0.813223	826	0.98934	0.98933	1	18780
TPP2	0.010666	0.035552	0.813223	827	0.15872	0.25686	1	4887
2021-03-05	0.010666	0.035552	0.813223	828	0.26573	0.38971	1	7392
UBE2F	0.010674	0.035576	0.813223	829	0.98933	0.98931	1	18779
GCLC	0.010682	0.035596	0.813223	830	0.87004	0.8699	1	16405
CDC23	0.010703	0.035653	0.813223	831	0.94115	0.94123	1	17740
EID2B	0.010703	0.035653	0.813223	832	0.87994	0.87993	1	16586
RIOK1	0.010713	0.035679	0.813223	833	0.98929	0.98927	1	18778
SPAG5	0.010721	0.035708	0.813223	834	0.98928	0.98926	1	18777
FAM98B	0.010738	0.035766	0.813223	835	0.98926	0.98925	1	18776
ZNF143	0.01076	0.03583	0.813223	836	0.022666	0.057811	0.943183	1168
ZNF484	0.010785	0.035912	0.813223	837	0.59695	0.60532	1	11449
UBE2S	0.010785	0.035913	0.813223	838	0.98921	0.9892	1	18775
SYT12	0.010807	0.035988	0.813223	839	0.31116	0.41453	1	7845
SP100	0.010814	0.036012	0.813223	840	0.98919	0.98917	1	18774
SVIL	0.010832	0.036059	0.813223	841	0.94939	0.94944	1	17920
CD74	0.010838	0.036075	0.813223	842	0.32728	0.42338	1	8019
OR5H14	0.010841	0.036082	0.813223	843	0.84147	0.84132	1	15887
DYNLL1	0.010886	0.036232	0.813223	844	0.98911	0.9891	1	18773
HSPBAP1	0.010893	0.036249	0.813223	845	0.66736	0.66775	1	12623
IL1B	0.010893	0.036249	0.813223	846	0.48057	0.5181	1	9775
TEKT4	0.010893	0.036249	0.813223	847	0.68336	0.68329	1	12903
CATSPER4	0.010893	0.036249	0.813223	848	0.65385	0.65503	1	12398
CDH12	0.010893	0.036249	0.813223	849	0.61913	0.62403	1	11805
ELOVL6	0.010933	0.036366	0.814882	850	0.80844	0.80832	1	15273
VPS33A	0.010984	0.036509	0.816345	851	0.52292	0.54785	1	10340
TUBA8	0.010985	0.036516	0.816345	852	0.98901	0.989	1	18772
DUS4L	0.011049	0.036714	0.816949	853	0.8182	0.81813	1	15454
GPR78	0.011153	0.037042	0.816949	854	0.050193	0.11711	0.967267	2310
GALR3	0.011186	0.03714	0.816949	855	0.57124	0.58439	1	11048
CD58	0.011196	0.037169	0.816949	856	0.85266	0.85251	1	16098
MYOM3	0.011205	0.037196	0.816949	857	0.27026	0.39243	1	7442
TEAD1	0.011209	0.037213	0.816949	858	0.93841	0.93846	1	17689
PPP1R3D	0.011217	0.03723	0.816949	859	0.98878	0.98877	1	18770
METTL1	0.011231	0.037276	0.816949	860	0.98877	0.98876	1	18769
FMR1	0.011244	0.037319	0.816949	861	0.35381	0.43855	1	8288
MCRS1	0.011247	0.037329	0.816949	862	0.98875	0.98875	1	18768
TRIP11	0.01126	0.037373	0.816949	863	0.98874	0.98873	1	18767
FBP2	0.01128	0.037444	0.816949	864	0.98872	0.98872	1	18766
ZNF835	0.011307	0.037529	0.816949	865	0.75321	0.753	1	14227
ODF3L1	0.011332	0.037606	0.816949	866	0.52473	0.54919	1	10375
SLC11A2	0.011361	0.037696	0.816949	867	0.89967	0.89963	1	16933
GPR20	0.011386	0.037782	0.816949	868	0.98861	0.98862	1	18765
KRBOX4	0.011403	0.037836	0.816949	869	0.9886	0.9886	1	18764
UBQLN2	0.011413	0.037862	0.816949	870	0.57995	0.59139	1	11173
CHMP7	0.011413	0.037862	0.816949	871	0.59846	0.60658	1	11471
PDCD5	0.011413	0.037862	0.816949	872	0.98332	0.98332	1	18620
UBE2Q2L	0.011417	0.037874	0.816949	873	0.97432	0.97446	1	18440
INO80E	0.011484	0.038078	0.816949	874	0.91418	0.91418	1	17232
SEC24B	0.011531	0.038219	0.816949	875	0.98847	0.98847	1	18763
KIF4A	0.011539	0.038246	0.816949	876	0.98846	0.98846	1	18762
SETDB1	0.011553	0.038291	0.816949	877	0.56244	0.57753	1	10913
HMGCLL1	0.011565	0.038324	0.816949	878	0.27972	0.39747	1	7539
CEP55	0.011579	0.038374	0.816949	879	0.89836	0.89827	1	16920
TESK1	0.011595	0.038426	0.816949	880	0.02513	0.063275	0.950726	1262
SLC5A6	0.011595	0.038426	0.816949	881	0.86569	0.86559	1	16331
ELAVL4	0.011597	0.03843	0.816949	882	0.9884	0.9884	1	18761
PLXND1	0.011671	0.038645	0.816949	883	0.10166	0.1848	0.991629	3561
IRF7	0.011671	0.038645	0.816949	884	0.27307	0.39393	1	7474
CYP3A43	0.011673	0.038654	0.816949	885	0.045346	0.10701	0.965178	2114
SLC45A4	0.011682	0.038684	0.816949	886	0.78947	0.78936	1	14902
TAF10	0.011689	0.038702	0.816949	887	0.062705	0.13502	0.985644	2603
SLC35A1	0.011711	0.038776	0.816949	888	0.98829	0.98829	1	18759
SBSPON	0.011721	0.038809	0.816949	889	0.98828	0.98828	1	18758
OR5T1	0.011727	0.038824	0.816949	890	0.98827	0.98827	1	18757
KLRB1	0.011741	0.038873	0.816949	891	0.98826	0.98826	1	18756
FAM92A1	0.011751	0.038905	0.816949	892	0.5702	0.58355	1	11028
ABCD4	0.011765	0.038956	0.816949	893	0.98823	0.98823	1	18754
QRICH2	0.011786	0.039017	0.816949	894	0.74306	0.74271	1	14054
TIPIN	0.011807	0.039074	0.816949	895	0.49417	0.52741	1	9933
DCTN3	0.01181	0.039083	0.816949	896	0.98819	0.98818	1	18751
OGDH	0.01181	0.039083	0.816949	897	0.98819	0.98818	1	18753
GTF2E2	0.01181	0.039083	0.816949	898	0.98819	0.98818	1	18752
RIBC1	0.011829	0.039147	0.816949	899	0.98525	0.98524	1	18667
COPS7A	0.011844	0.0392	0.816949	900	0.98816	0.98814	1	18750
MPRIP	0.011852	0.039218	0.816949	901	0.82467	0.82463	1	15571
OR5D13	0.01186	0.039236	0.816949	902	0.52605	0.55015	1	10393
TRAF3IP2	0.011868	0.03926	0.816949	903	0.6943	0.69415	1	13106
ANKRD18B	0.011874	0.039281	0.816949	904	0.98813	0.98812	1	18749
RGS20	0.011881	0.039295	0.816949	905	0.68472	0.6846	1	12927
PAX5	0.011885	0.039304	0.816949	906	0.94881	0.94885	1	17903
BBS2	0.011893	0.039331	0.816949	907	0.96406	0.96411	1	18218
METTL24	0.011898	0.03935	0.816949	908	0.9881	0.9881	1	18748
CHST8	0.011911	0.039395	0.816949	909	0.90545	0.90545	1	17044
WRAP53	0.011915	0.039408	0.816949	910	0.93267	0.93277	1	17568
MND1	0.011916	0.03941	0.816949	911	0.98808	0.98808	1	18747
PANK3	0.011923	0.03943	0.816949	912	0.98808	0.98807	1	18746
OR6A2	0.011933	0.03946	0.816949	913	0.12325	0.21216	0.9955	4063
RSL24D1	0.011943	0.039489	0.816949	914	0.98806	0.98806	1	18744
CNKSR2	0.01196	0.039545	0.816949	915	0.90386	0.90387	1	17021
DNAJB14	0.011979	0.039603	0.816949	916	0.98802	0.98803	1	18743
KIZ	0.011987	0.039627	0.816949	917	0.09316	0.17413	0.989014	3352
UIMC1	0.012032	0.039768	0.816949	918	0.97564	0.97582	1	18459
SNIP1	0.012043	0.039797	0.816949	919	0.3563	0.44	1	8311
RPUSD2	0.012074	0.039891	0.816949	920	0.98793	0.98793	1	18741
CHRAC1	0.012087	0.039937	0.816949	921	0.72076	0.72055	1	13638
CCDC17	0.012089	0.039945	0.816949	922	0.51245	0.54029	1	10197
SMDT1	0.012089	0.039945	0.816949	923	0.95345	0.95349	1	18006
POLR2I	0.012115	0.040022	0.816949	924	0.98789	0.98788	1	18740
HGS	0.012115	0.040022	0.816949	925	0.98789	0.98788	1	18738
NELFCD	0.012115	0.040022	0.816949	926	0.98789	0.98788	1	18739
FAM192A	0.012154	0.040142	0.816949	927	0.74146	0.7411	1	14033
FFAR1	0.012216	0.040337	0.816949	928	0.47638	0.51524	1	9724
NAPG	0.012225	0.040365	0.816949	929	0.94426	0.94435	1	17804
IGFLR1	0.012232	0.040391	0.816949	930	0.29014	0.40299	1	7642
LGI2	0.012262	0.040487	0.816949	931	0.95589	0.95592	1	18049
MYH6	0.012262	0.040488	0.816949	932	0.85833	0.85816	1	16209
KCTD10	0.012264	0.040495	0.816949	933	0.98774	0.98773	1	18737
SAPCD1	0.012286	0.040569	0.816949	934	0.90358	0.90359	1	17015
RFC4	0.012297	0.040602	0.816949	935	0.96975	0.96979	1	18346
SERF2	0.012302	0.040617	0.816949	936	0.1062	0.19058	0.994545	3652
TFF3	0.012365	0.04081	0.816949	937	0.98764	0.98761	1	18736
PHF10	0.012367	0.04082	0.816949	938	0.63482	0.63777	1	12067
RGPD4	0.012375	0.040839	0.816949	939	0.98679	0.98672	1	18702
NFKBIB	0.012375	0.040839	0.816949	940	0.41193	0.47346	1	8914
UTP3	0.01239	0.040885	0.816949	941	0.98761	0.98759	1	18735
C3orf17	0.012396	0.040897	0.816949	942	0.92115	0.92129	1	17354
CXorf21	0.012421	0.040976	0.816949	943	0.93501	0.93511	1	17612
HIST2H3A	0.012443	0.041053	0.816949	944	0.9357	0.93579	1	17627
APOL6	0.012453	0.041082	0.816949	945	0.079679	0.15691	0.987214	3031
RBMS3	0.012469	0.041125	0.816949	946	0.87058	0.87047	1	16417
TCERG1	0.012469	0.041126	0.816949	947	0.98753	0.98751	1	18734
FBXO24	0.012482	0.041166	0.816949	948	0.98752	0.9875	1	18733
PRAM1	0.012484	0.041171	0.816949	949	0.98752	0.98749	1	18732
FTO	0.01249	0.041193	0.816949	950	0.13096	0.22187	1	4232
KRTAP1-4	0.012494	0.041206	0.816949	951	0.82003	0.81997	1	15484
C8orf48	0.012505	0.041238	0.816949	952	0.98749	0.98747	1	18731
TRIM14	0.012511	0.041251	0.816949	953	0.49193	0.52587	1	9913
WBP1L	0.012525	0.041293	0.816949	954	0.98747	0.98746	1	18730
NPFF	0.012531	0.041307	0.816949	955	0.080566	0.15805	0.987492	3055
TAS2R60	0.012531	0.041307	0.816949	956	0.28685	0.40123	1	7609
PRAMEF8	0.012547	0.041351	0.816949	957	0.98745	0.98743	1	18729
FUT9	0.012568	0.041416	0.816949	958	0.55121	0.56887	1	10760
ORC2	0.012575	0.04144	0.816949	959	0.98742	0.9874	1	18727
NCBP2	0.012575	0.04144	0.816949	960	0.98742	0.9874	1	18726
POLR2J3	0.012575	0.04144	0.816949	961	0.98742	0.9874	1	18728
NABP2	0.012581	0.041464	0.816949	962	0.018519	0.048439	0.930902	992
ENOPH1	0.012594	0.0415	0.816949	963	0.98741	0.98738	1	18725
CENPA	0.012603	0.041532	0.816949	964	0.9874	0.98737	1	18724
STRA13	0.012608	0.041547	0.816949	965	0.98739	0.98736	1	18723
CLNS1A	0.01261	0.033346	0.810532	966	0.0033209	0.0092009	0.787003	279
INCENP	0.012646	0.041661	0.816949	967	0.9447	0.94475	1	17812
SCD	0.012646	0.041661	0.816949	968	0.64384	0.64589	1	12211
DRD4	0.012675	0.04175	0.816949	969	0.98732	0.98728	1	18721
MRFAP1	0.012713	0.041863	0.816949	970	0.43391	0.48728	1	9191
MTUS2	0.012725	0.041899	0.816949	971	0.98728	0.98722	1	18720
ORC6	0.012725	0.041899	0.816949	972	0.98728	0.98722	1	18719
TTC28	0.01273	0.041916	0.816949	973	0.35469	0.43907	1	8297
SLC25A48	0.01273	0.041916	0.816949	974	0.064601	0.13753	0.985644	2658
CCDC59	0.012752	0.04198	0.816949	975	0.47603	0.515	1	9718
ARL3	0.012752	0.041982	0.816949	976	0.98725	0.9872	1	18718
SEC61A2	0.012768	0.042045	0.816949	977	0.93395	0.93403	1	17593
CDC42BPB	0.01277	0.042055	0.816949	978	0.98723	0.98718	1	18717
SCCPDH	0.012771	0.033766	0.812062	979	0.2475	0.31058	1	6944
FDFT1	0.012795	0.042126	0.816949	980	0.9872	0.98716	1	18716
BCO2	0.012807	0.042161	0.816949	981	0.95702	0.95703	1	18067
NUP107	0.012816	0.042183	0.816949	982	0.92723	0.9274	1	17459
ADGRE5	0.01286	0.042312	0.816949	983	0.98714	0.98709	1	18715
PRSS1	0.01289	0.042411	0.816949	984	0.91721	0.91727	1	17281
ZNF410	0.012895	0.042423	0.816949	985	0.77594	0.77567	1	14644
SOWAHC	0.012895	0.042423	0.816949	986	0.62874	0.63245	1	11960
CWF19L1	0.012896	0.042428	0.816949	987	0.98523	0.98523	1	18666
ANKRD36	0.012897	0.042432	0.816949	988	0.9871	0.98706	1	18714
SNX5	0.012925	0.042514	0.816949	989	0.43165	0.48581	1	9162
APBB3	0.012933	0.042542	0.816949	990	0.96865	0.96871	1	18309
ASB7	0.012975	0.042667	0.816949	991	0.98703	0.98698	1	18713
GABPB1	0.013	0.042754	0.816949	992	0.987	0.98695	1	18712
RELL1	0.013009	0.042781	0.816949	993	0.80448	0.80439	1	15196
KLHL20	0.013031	0.042838	0.816949	994	0.50963	0.53829	1	10146
FANCM	0.013042	0.042869	0.816949	995	0.78012	0.77986	1	14719
ZNF202	0.013045	0.04288	0.816949	996	0.98696	0.9869	1	18709
U2AF1L4	0.013077	0.042967	0.816949	997	0.98692	0.98687	1	18708
TRAFD1	0.013116	0.043085	0.816949	998	0.98688	0.98682	1	18706
CCDC82	0.013116	0.043085	0.816949	999	0.98688	0.98682	1	18707
ARPC4-TTLL3	0.013128	0.043116	0.816949	1000	0.83156	0.83158	1	15699
KLHL30	0.013128	0.043116	0.816949	1001	0.29269	0.40434	1	7663
NTN1	0.013128	0.043116	0.816949	1002	0.63602	0.63882	1	12085
HHIPL2	0.013128	0.043116	0.816949	1003	0.64894	0.65053	1	12311
MLN	0.013128	0.043116	0.816949	1004	0.47035	0.51112	1	9660
MCCC1	0.013134	0.043133	0.816949	1005	0.77571	0.77546	1	14640
ICE2	0.013134	0.043133	0.816949	1006	0.98416	0.98414	1	18633
KRTAP10-3	0.013135	0.043137	0.816949	1007	0.98687	0.9868	1	18705
TAGLN3	0.013147	0.043175	0.816949	1008	0.29717	0.40677	1	7713
EEF1B2	0.013148	0.043177	0.816949	1009	0.98685	0.98679	1	18704
SPAM1	0.013161	0.043211	0.816949	1010	0.98684	0.98677	1	18703
ZNF24	0.013217	0.043384	0.818601	1011	0.6462	0.64803	1	12264
PCDHB3	0.013217	0.043384	0.818601	1012	0.70036	0.70011	1	13234
MED14	0.013237	0.043451	0.818627	1013	0.98676	0.9867	1	18701
BIRC3	0.013244	0.043471	0.818627	1014	0.80774	0.80765	1	15264
HRH4	0.013268	0.043544	0.819195	1015	0.33649	0.42864	1	8111
KNG1	0.013282	0.04359	0.819246	1016	0.98672	0.98666	1	18700
G3BP1	0.013321	0.043706	0.82062	1017	0.98668	0.98661	1	18699
POU2F1	0.013364	0.043828	0.820817	1018	0.43234	0.48626	1	9170
SCD5	0.013364	0.04383	0.820817	1019	0.98664	0.98657	1	18698
PCDHB16	0.013369	0.043845	0.820817	1020	0.55519	0.5719	1	10810
FAM219B	0.013428	0.044024	0.82114	1021	0.30339	0.41018	1	7773
IPCEF1	0.01344	0.044064	0.82114	1022	0.80659	0.80651	1	15242
C5orf24	0.01344	0.044064	0.82114	1023	0.6847	0.68459	1	12926
NCAPD2	0.013446	0.044077	0.82114	1024	0.96493	0.96498	1	18238
EIF4EBP2	0.013466	0.044135	0.821411	1025	0.74125	0.74088	1	14030
PDLIM4	0.013511	0.044284	0.822084	1026	0.98649	0.98644	1	18695
CCDC7	0.013524	0.04432	0.822084	1027	0.98648	0.98642	1	18694
CTSD	0.013533	0.044349	0.822084	1028	0.3295	0.42467	1	8043
TMEM91	0.013543	0.044383	0.822084	1029	0.98646	0.98641	1	18693
UBE2A	0.013544	0.044386	0.822084	1030	0.91448	0.91451	1	17237
VPS53	0.013557	0.044429	0.822094	1031	0.98644	0.98639	1	18692
KIF2A	0.013586	0.044522	0.823003	1032	0.9773	0.9775	1	18499
SSX4B	0.013674	0.044783	0.827039	1033	0.42485	0.48154	1	9077
ZNF823	0.01373	0.044966	0.827893	1034	0.98627	0.98623	1	18689
TMEM165	0.01373	0.044966	0.827893	1035	0.98627	0.98623	1	18690
ZDHHC12	0.013733	0.044974	0.827893	1036	0.98384	0.98383	1	18630
RBSN	0.013743	0.045006	0.827893	1037	0.19838	0.30629	1	5805
GGTLC2	0.013757	0.045051	0.827893	1038	0.60297	0.6103	1	11542
SIGLEC7	0.013771	0.045089	0.827893	1039	0.98623	0.9862	1	18686
SHISA2	0.013835	0.045294	0.829078	1040	0.24725	0.36689	1	6936
HOXA4	0.013853	0.045355	0.829078	1041	0.98615	0.98614	1	18685
C10orf54	0.013856	0.045365	0.829078	1042	0.65908	0.65992	1	12489
PSMG2	0.01388	0.045434	0.829078	1043	0.9711	0.97121	1	18379
RAD17	0.01388	0.045434	0.829078	1044	0.93635	0.93641	1	17649
PLAA	0.013937	0.045612	0.829078	1045	0.93511	0.93521	1	17616
DDT	0.013966	0.045694	0.829078	1046	0.33032	0.42512	1	8051
MBD6	0.013972	0.045719	0.829078	1047	0.96181	0.96184	1	18172
SRSF5	0.013976	0.045727	0.829078	1048	0.8239	0.82387	1	15557
NR2C1	0.013977	0.045731	0.829078	1049	0.98602	0.98601	1	18684
HEBP2	0.01398	0.045745	0.829078	1050	0.98602	0.986	1	18683
ZNF428	0.013997	0.045802	0.829078	1051	0.18617	0.29115	1	5512
KIR3DL2	0.014004	0.045824	0.829078	1052	0.986	0.98598	1	18682
FAM180B	0.014011	0.045843	0.829078	1053	0.24683	0.36636	1	6924
USP10	0.014032	0.0459	0.829078	1054	0.98597	0.98594	1	18681
ARHGAP26	0.014037	0.045913	0.829078	1055	0.2069	0.31698	1	6014
ELFN1	0.014063	0.046007	0.829078	1056	0.95171	0.95176	1	17976
SIN3B	0.014083	0.046063	0.829078	1057	0.76324	0.76296	1	14402
DNAJB8	0.014083	0.046063	0.829078	1058	0.30758	0.41247	1	7816
HECTD1	0.0141	0.046125	0.829078	1059	0.86295	0.86284	1	16289
USP17L8	0.0141	0.046125	0.829078	1060	0.98018	0.98026	1	18563
KIF15	0.014115	0.046168	0.829078	1061	0.74884	0.74852	1	14151
POTEE	0.014129	0.046216	0.829078	1062	0.98587	0.98584	1	18679
OSMR	0.014137	0.046238	0.829078	1063	0.9462	0.94623	1	17854
CHST10	0.014186	0.046386	0.83015	1064	0.58254	0.59349	1	11210
USP31	0.014187	0.046389	0.83015	1065	0.10093	0.18389	0.990942	3542
C18orf8	0.014199	0.046428	0.83015	1066	0.9858	0.98577	1	18678
NCAPG	0.014293	0.046725	0.830742	1067	0.79087	0.79075	1	14935
NIPSNAP3B	0.014296	0.046738	0.830742	1068	0.36805	0.44691	1	8440
TMEM200A	0.014296	0.046738	0.830742	1069	0.56215	0.57733	1	10906
ANXA1	0.014318	0.046797	0.830742	1070	0.46646	0.50851	1	9605
CSDE1	0.014322	0.046816	0.830742	1071	0.016034	0.042752	0.917119	890
SPATA31A3	0.014322	0.046816	0.830742	1072	0.23703	0.35432	1	6709
BCAP29	0.014322	0.046816	0.830742	1073	0.73825	0.73784	1	13973
MDH2	0.014322	0.046816	0.830742	1074	0.041875	0.099665	0.959885	1978
POC5	0.014333	0.046853	0.830742	1075	0.98567	0.98564	1	18677
ADAM20	0.014356	0.04692	0.831174	1076	0.98564	0.98562	1	18676
IFNA4	0.014397	0.047055	0.832788	1077	0.91008	0.91007	1	17141
NUDT18	0.014462	0.047253	0.835516	1078	0.98554	0.98552	1	18674
TLCD1	0.014484	0.047325	0.836016	1079	0.81426	0.81418	1	15380
LACC1	0.014509	0.047399	0.836273	1080	0.98549	0.98547	1	18673
MAGEA2	0.014519	0.047427	0.836273	1081	0.98548	0.98546	1	18672
SAMD9L	0.014632	0.047765	0.839687	1082	0.024866	0.062677	0.950726	1250
AKAP7	0.014632	0.047765	0.839687	1083	0.77446	0.7742	1	14615
WIBG	0.014641	0.047796	0.839687	1084	0.37483	0.45089	1	8503
PGPEP1L	0.014641	0.047796	0.839687	1085	0.98536	0.98535	1	18671
KHK	0.014666	0.047871	0.840225	1086	0.80098	0.8009	1	15130
TMEM182	0.014683	0.047929	0.840481	1087	0.98532	0.98531	1	18669
UBA2	0.014747	0.048116	0.841201	1088	0.91682	0.91687	1	17274
MSL1	0.014747	0.048116	0.841201	1089	0.98525	0.98525	1	18668
DOK4	0.014781	0.048219	0.841201	1090	0.15812	0.25613	1	4873
C17orf82	0.014786	0.048235	0.841201	1091	0.69949	0.69927	1	13216
SWI5	0.014789	0.048243	0.841201	1092	0.95397	0.954	1	18015
SRBD1	0.014789	0.048243	0.841201	1093	0.58194	0.593	1	11200
TOP3B	0.014798	0.048279	0.841201	1094	0.98493	0.98492	1	18659
AOC1	0.014815	0.04834	0.841498	1095	0.98519	0.98518	1	18665
ANGPTL3	0.014914	0.048665	0.845023	1096	0.98509	0.98507	1	18664
C5orf45	0.01497	0.048841	0.845023	1097	0.98503	0.98501	1	18662
NCOA5	0.014977	0.048858	0.845023	1098	0.98502	0.98501	1	18661
FKBP9	0.014985	0.048889	0.845023	1099	0.98502	0.985	1	18660
MMP17	0.014997	0.048932	0.845023	1100	0.79581	0.7957	1	15035
DLL3	0.014997	0.048932	0.845023	1101	0.024724	0.062361	0.950726	1243
OR51D1	0.014997	0.048932	0.845023	1102	0.85272	0.85257	1	16102
MPHOSPH10	0.014997	0.048932	0.845023	1103	0.0052617	0.017159	0.827287	391
PIM3	0.015001	0.04894	0.845023	1104	0.39882	0.46542	1	8766
ADAMTS20	0.015059	0.049119	0.846544	1105	0.11351	0.19997	0.994545	3828
ZNF320	0.01507	0.049159	0.846544	1106	0.89321	0.89313	1	16831
POMT1	0.015079	0.049184	0.846544	1107	0.98492	0.98491	1	18658
IGSF5	0.015088	0.049205	0.846544	1108	0.17555	0.27795	1	5297
DIMT1	0.015111	0.049277	0.846826	1109	0.98489	0.98488	1	18657
CLEC5A	0.015152	0.049396	0.846826	1110	0.84022	0.84007	1	15867
SSR2	0.015152	0.049397	0.846826	1111	0.29172	0.40383	1	7656
STBD1	0.015184	0.049481	0.846826	1112	0.98482	0.98482	1	18656
CST1	0.015227	0.049603	0.846826	1113	0.98477	0.98477	1	18655
SPRR2B	0.01523	0.04961	0.846826	1114	0.21735	0.33002	1	6252
MIER1	0.01523	0.04961	0.846826	1115	0.74239	0.74204	1	14047
MFSD12	0.015246	0.049652	0.846826	1116	0.27559	0.39522	1	7499
ANK3	0.015264	0.049702	0.846826	1117	0.98474	0.98473	1	18653
KCMF1	0.015271	0.049723	0.846826	1118	0.98473	0.98473	1	18652
SEMG2	0.015275	0.049736	0.846826	1119	0.98473	0.98472	1	18651
DHTKD1	0.01528	0.049753	0.846826	1120	0.67688	0.67694	1	12784
SLC7A5	0.015306	0.049842	0.847434	1121	0.98469	0.98468	1	18650
SLC2A13	0.015331	0.04992	0.847434	1122	0.97796	0.97814	1	18509
TTC16	0.015335	0.04993	0.847434	1123	0.038946	0.093413	0.957222	1859
DDX58	0.01536	0.05001	0.847434	1124	0.17207	0.27362	1	5202
LOC388436	0.01536	0.050011	0.847434	1125	0.98464	0.98463	1	18648
ESAM	0.015452	0.050285	0.84805	1126	0.98455	0.98454	1	18646
ZDHHC11	0.015463	0.050321	0.84805	1127	0.98454	0.98452	1	18644
OR6B2	0.015472	0.050351	0.84805	1128	0.69458	0.69442	1	13110
SLC35A5	0.015474	0.050354	0.84805	1129	0.5438	0.56324	1	10653
PRAF2	0.01549	0.050411	0.84805	1130	0.39911	0.46561	1	8771
RCAN1	0.015495	0.050426	0.84805	1131	0.34189	0.43171	1	8161
RANBP3	0.015499	0.050439	0.84805	1132	0.9845	0.98449	1	18643
FPGT-TNNI3K	0.015511	0.05047	0.84805	1133	0.98449	0.98448	1	18642
H1F0	0.015515	0.050482	0.84805	1134	0.98448	0.98447	1	18641
GIMAP1-GIMAP5	0.015526	0.050515	0.84805	1135	0.98447	0.98446	1	18640
CEP152	0.01554	0.050561	0.84805	1136	0.98446	0.98445	1	18639
PITX1	0.015544	0.05058	0.84805	1137	0.58721	0.59732	1	11269
SFSWAP	0.01559	0.05072	0.849659	1138	0.98441	0.9844	1	18638
TMEM42	0.015645	0.050902	0.850851	1139	0.64151	0.6438	1	12183
AASS	0.015645	0.050902	0.850851	1140	0.7108	0.71047	1	13443
HR	0.015666	0.050966	0.850851	1141	0.88734	0.8873	1	16722
DOLK	0.015671	0.050979	0.850851	1142	0.49417	0.52741	1	9941
CA4	0.015692	0.051048	0.850851	1143	0.67001	0.67028	1	12673
CCDC96	0.015696	0.051058	0.850851	1144	0.67654	0.6766	1	12779
TYW1B	0.01573	0.051159	0.851223	1145	0.96403	0.96408	1	18216
C22orf15	0.015739	0.051192	0.851223	1146	0.98426	0.98425	1	18636
SCN5A	0.015746	0.051214	0.851223	1147	0.98425	0.98424	1	18635
CDCP1	0.015816	0.05143	0.853152	1148	0.92176	0.92192	1	17365
KLHDC10	0.015838	0.051505	0.853152	1149	0.85287	0.85272	1	16105
CCNH	0.015843	0.051518	0.853152	1150	0.75562	0.75542	1	14266
GOLGA6L6	0.015843	0.051518	0.853152	1151	0.2593	0.38179	1	7239
KIAA1522	0.015852	0.051553	0.853152	1152	0.83531	0.83527	1	15778
CELA3B	0.015891	0.051683	0.854296	1153	0.97072	0.9708	1	18372
PHPT1	0.0159	0.051712	0.854296	1154	0.9841	0.98409	1	18632
SIGLEC5	0.015929	0.051793	0.854901	1155	0.50478	0.53483	1	10081
TTC23	0.016003	0.052017	0.855662	1156	0.93199	0.9321	1	17551
OXGR1	0.016034	0.052112	0.855662	1157	0.96422	0.96427	1	18224
WARS2	0.016034	0.052112	0.855662	1158	0.84605	0.8459	1	15976
CLEC19A	0.016034	0.052112	0.855662	1159	0.3265	0.42294	1	8009
2021-03-04	0.016034	0.052112	0.855662	1160	0.55659	0.57297	1	10827
KITLG	0.016046	0.052156	0.855662	1161	0.46692	0.50882	1	9612
C20orf203	0.016095	0.052303	0.855662	1162	0.21043	0.32142	1	6098
AUNIP	0.016106	0.052337	0.855662	1163	0.53698	0.55815	1	10557
EXOC3	0.016108	0.052339	0.855662	1164	0.93329	0.93339	1	17581
STK17A	0.016121	0.05237	0.855662	1165	0.9344	0.93451	1	17598
C17orf74	0.016146	0.052438	0.855662	1166	0.98385	0.98384	1	18631
SAAL1	0.016164	0.052492	0.855662	1167	0.90043	0.90039	1	16951
AFTPH	0.016189	0.052561	0.855662	1168	0.74843	0.74813	1	14141
DPYSL4	0.016231	0.052683	0.855662	1169	0.98377	0.98377	1	18629
HNRNPA2B1	0.016235	0.052695	0.855662	1170	0.73648	0.73604	1	13936
MRPS27	0.016235	0.052695	0.855662	1171	0.031746	0.077835	0.95668	1542
ATP6V1D	0.016235	0.052695	0.855662	1172	0.92658	0.92675	1	17451
ADAM12	0.016258	0.052775	0.855662	1173	0.98374	0.98374	1	18628
RBMXL3	0.016284	0.052861	0.855662	1174	0.98372	0.98371	1	18627
USP17L22	0.016292	0.052886	0.855662	1175	0.98371	0.9837	1	18626
MCM8	0.016316	0.052949	0.855662	1176	0.78982	0.78972	1	14907
HTRA4	0.016318	0.052954	0.855662	1177	0.98368	0.98367	1	18625
PPIAL4C	0.016319	0.052956	0.855662	1178	0.51327	0.54084	1	10209
CYHR1	0.016334	0.052993	0.855662	1179	0.98367	0.98365	1	18624
PIGM	0.016334	0.052993	0.855662	1180	0.98367	0.98365	1	18623
OTULIN	0.016338	0.053003	0.855662	1181	0.090573	0.17082	0.989014	3289
SLC9A3R2	0.016388	0.053156	0.856706	1182	0.89194	0.89187	1	16813
GSTZ1	0.0164	0.053193	0.856706	1183	0.42166	0.47951	1	9035
PLRG1	0.016439	0.053312	0.856706	1184	0.98356	0.98354	1	18622
PCDHA13	0.016448	0.053337	0.856706	1185	0.68854	0.68836	1	12990
XPR1	0.016448	0.053337	0.856706	1186	0.095351	0.17692	0.989014	3414
MYBPHL	0.016448	0.053337	0.856706	1187	0.35569	0.43963	1	8304
GAB2	0.016525	0.053572	0.859761	1188	0.97779	0.97798	1	18506
ATE1	0.01654	0.053619	0.859787	1189	0.55995	0.57558	1	10872
C10orf113	0.016584	0.05375	0.860421	1190	0.71759	0.71731	1	13585
ASB8	0.016584	0.05375	0.860421	1191	0.90237	0.90236	1	16991
RNF149	0.016601	0.053793	0.860421	1192	0.96478	0.96483	1	18235
CHSY1	0.016627	0.053879	0.861076	1193	0.98337	0.98337	1	18621
PKP2	0.016682	0.054038	0.862892	1194	0.94548	0.94549	1	17831
SNF8	0.016775	0.054307	0.866155	1195	0.98322	0.98324	1	18619
ATAD2	0.016785	0.054333	0.866155	1196	0.038386	0.092182	0.95668	1828
TPH1	0.016833	0.054472	0.867424	1197	0.80579	0.80569	1	15222
SCO1	0.016912	0.044043	0.82114	1198	0.98309	0.98324	1	18617
MRPL19	0.016915	0.054705	0.867424	1199	0.68317	0.6831	1	12898
DGCR6	0.016953	0.054823	0.867424	1200	0.88932	0.88927	1	16764
CUL4B	0.016992	0.054935	0.867424	1201	0.92689	0.92706	1	17453
GRHL2	0.016992	0.054935	0.867424	1202	0.22309	0.33714	1	6368
SLCO4C1	0.016992	0.054935	0.867424	1203	0.98032	0.9804	1	18566
RSRC1	0.016992	0.054935	0.867424	1204	0.26026	0.38297	1	7258
FCGR1B	0.016992	0.054935	0.867424	1205	0.8897	0.88963	1	16773
RTN4	0.016998	0.054954	0.867424	1206	0.62092	0.62555	1	11834
DDAH2	0.016998	0.054954	0.867424	1207	0.96899	0.96904	1	18320
TBCE	0.016999	0.054957	0.867424	1208	0.983	0.98301	1	18616
RPL37A	0.016999	0.054957	0.867424	1209	0.983	0.98301	1	18615
CLPX	0.017073	0.055187	0.870335	1210	0.98293	0.98295	1	18614
C2orf72	0.017093	0.05524	0.87045	1211	0.85236	0.8522	1	16094
CNPY2	0.01712	0.055332	0.871185	1212	0.97669	0.97689	1	18486
TMEM19	0.01716	0.055442	0.871243	1213	0.92282	0.92296	1	17380
TIMM22	0.017214	0.055607	0.871243	1214	0.75587	0.75568	1	14270
CD70	0.017215	0.055608	0.871243	1215	0.98279	0.98281	1	18612
VPS8	0.017225	0.055636	0.871243	1216	0.88441	0.88436	1	16665
LRRC14	0.017225	0.055636	0.871243	1217	0.087533	0.16697	0.989014	3214
SNAP23	0.017243	0.055699	0.871243	1218	0.96241	0.96244	1	18184
CUBN	0.017251	0.055722	0.871243	1219	0.98275	0.98277	1	18611
SLC25A30	0.01727	0.05578	0.871243	1220	0.98273	0.98276	1	18610
DRAXIN	0.017272	0.055786	0.871243	1221	0.41442	0.47501	1	8947
XRCC6	0.017341	0.056005	0.871243	1222	0.98266	0.98269	1	18609
SFT2D2	0.017365	0.05607	0.871243	1223	0.98264	0.98267	1	18608
ZNHIT6	0.017392	0.045227	0.829078	1224	0.98261	0.98276	1	18607
DDX53	0.017406	0.056179	0.871243	1225	0.20276	0.31176	1	5913
GJA9	0.017407	0.05618	0.871243	1226	0.064573	0.1375	0.985644	2657
FITM2	0.017407	0.05618	0.871243	1227	0.23665	0.35387	1	6701
USP17L18	0.017413	0.056196	0.871243	1228	0.98259	0.98261	1	18606
SSTR3	0.017413	0.056196	0.871243	1229	0.16038	0.2589	1	4930
MKRN3	0.017413	0.056196	0.871243	1230	0.62963	0.63323	1	11975
FARSB	0.017423	0.056232	0.871243	1231	0.83822	0.83811	1	15824
SNX18	0.017429	0.056247	0.871243	1232	0.98257	0.9826	1	18605
EXOG	0.017502	0.056449	0.872508	1233	0.68797	0.6878	1	12976
CNBD2	0.017507	0.056465	0.872508	1234	0.98249	0.98251	1	18603
ZBTB22	0.017507	0.056466	0.872508	1235	0.92603	0.92619	1	17435
KCNMB1	0.017536	0.056546	0.873043	1236	0.85505	0.85492	1	16146
MKLN1	0.017569	0.056653	0.873976	1237	0.69669	0.69647	1	13156
NAA20	0.017611	0.056765	0.875004	1238	0.94409	0.94418	1	17801
PIGN	0.017639	0.056838	0.875326	1239	0.78375	0.78361	1	14780
TBC1D20	0.017691	0.056991	0.875326	1240	0.98231	0.98232	1	18602
VWC2L	0.017691	0.056992	0.875326	1241	0.56748	0.58145	1	10981
NSD1	0.017705	0.057028	0.875326	1242	0.71288	0.71252	1	13487
KANSL1	0.017713	0.057054	0.875326	1243	0.98229	0.9823	1	18601
MLNR	0.017769	0.05721	0.875326	1244	0.94572	0.94575	1	17838
DNHD1	0.017795	0.057291	0.875326	1245	0.76857	0.76834	1	14509
KNTC1	0.017795	0.057291	0.875326	1246	0.80411	0.80402	1	15188
SLC16A3	0.017795	0.057291	0.875326	1247	0.948	0.94806	1	17891
APITD1-CORT	0.017869	0.057483	0.875326	1248	0.92225	0.92241	1	17375
IL1A	0.017912	0.057613	0.875326	1249	0.67438	0.6745	1	12745
FKBP10	0.017916	0.057627	0.875326	1250	0.36701	0.4463	1	8423
NAT1	0.017921	0.05764	0.875326	1251	0.98208	0.98211	1	18600
ONECUT2	0.017924	0.057648	0.875326	1252	0.10684	0.19137	0.994545	3668
FCGR3A	0.017924	0.057648	0.875326	1253	0.15438	0.25137	1	4797
OR56B1	0.017929	0.057664	0.875326	1254	0.98207	0.9821	1	18599
PAPSS2	0.017931	0.057667	0.875326	1255	0.9609	0.96091	1	18149
SYN2	0.017966	0.057769	0.875326	1256	0.98203	0.98207	1	18597
MBD3	0.01797	0.05778	0.875326	1257	0.12211	0.21077	0.9955	4038
CXCR3	0.017984	0.057814	0.875326	1258	0.85815	0.85801	1	16205
NUP210L	0.018025	0.057934	0.875326	1259	0.94693	0.94699	1	17872
RASGEF1C	0.018032	0.057954	0.875326	1260	0.36545	0.44536	1	8405
COPS3	0.018054	0.058017	0.875326	1261	0.71426	0.71392	1	13521
TMEM150B	0.018063	0.058053	0.875326	1262	0.98194	0.98196	1	18596
KCNC1	0.018066	0.058062	0.875326	1263	0.58586	0.59625	1	11252
MON2	0.018066	0.058062	0.875326	1264	0.45167	0.49872	1	9405
VPS16	0.018068	0.058068	0.875326	1265	0.98193	0.98196	1	18595
PNRC2	0.018071	0.058075	0.875326	1266	0.28404	0.39976	1	7580
GLRB	0.018126	0.058233	0.875326	1267	0.79864	0.79856	1	15088
CTSS	0.01815	0.058298	0.875326	1268	0.59392	0.60283	1	11394
STRN	0.018183	0.058397	0.875326	1269	0.74685	0.74652	1	14120
HEATR3	0.018183	0.058397	0.875326	1270	0.3321	0.42615	1	8068
FAM84A	0.01823	0.058526	0.875326	1271	0.45348	0.49993	1	9428
C11orf85	0.018234	0.058538	0.875326	1272	0.98177	0.98179	1	18594
VIP	0.018237	0.058546	0.875326	1273	0.98176	0.98178	1	18593
PARD3	0.018334	0.058846	0.875326	1274	0.67663	0.67669	1	12780
ZNF28	0.018336	0.058849	0.875326	1275	0.98166	0.98169	1	18591
DPP9	0.018363	0.058931	0.875326	1276	0.98164	0.98166	1	18590
MRPL17	0.01837	0.058951	0.875326	1277	0.98163	0.98165	1	18589
FOXM1	0.018383	0.059	0.875326	1278	0.98162	0.98164	1	18588
ZFC3H1	0.018389	0.05902	0.875326	1279	0.98161	0.98163	1	18587
CDK5RAP1	0.018399	0.059052	0.875326	1280	0.12922	0.21968	0.999732	4199
DDX26B	0.018403	0.059064	0.875326	1281	0.13826	0.23116	1	4386
OR5K1	0.018415	0.059106	0.875326	1282	0.80852	0.8084	1	15276
DHX15	0.01842	0.059125	0.875326	1283	0.98158	0.9816	1	18586
CHCHD3	0.018423	0.059134	0.875326	1284	0.96425	0.96431	1	18225
ANGPTL1	0.018423	0.059134	0.875326	1285	0.60804	0.61452	1	11625
ZNF10	0.018443	0.059193	0.875326	1286	0.13191	0.22307	1	4254
YIPF4	0.018444	0.0592	0.875326	1287	0.25464	0.37595	1	7125
FBXL15	0.018493	0.059342	0.875326	1288	0.8424	0.84225	1	15907
CD37	0.018493	0.059342	0.875326	1289	0.87827	0.87823	1	16560
TFPI	0.018493	0.059342	0.875326	1290	0.1223	0.21098	0.9955	4042
GPR173	0.018493	0.059342	0.875326	1291	0.25511	0.37654	1	7134
NES	0.018493	0.059342	0.875326	1292	0.96131	0.96129	1	18158
KRTAP16-1	0.018498	0.059361	0.875326	1293	0.9815	0.98152	1	18585
PRR20D	0.018516	0.059412	0.875326	1294	0.19641	0.30386	1	5763
LOC100287036	0.01852	0.059416	0.875326	1295	0.96883	0.9689	1	18314
ST6GAL2	0.018528	0.059442	0.875326	1296	0.91014	0.91013	1	17143
RIF1	0.018583	0.059604	0.877038	1297	0.98142	0.98143	1	18584
SPHAR	0.018601	0.034442	0.812167	1298	0.97899	0.97905	1	18536
CEP57	0.018673	0.059862	0.877992	1299	0.77565	0.77538	1	14638
TRIM27	0.018706	0.059942	0.877992	1300	0.77109	0.77086	1	14556
XRN2	0.018706	0.059944	0.877992	1301	0.7972	0.7971	1	15066
LMO4	0.018726	0.059996	0.877992	1302	0.97874	0.97889	1	18532
CUTC	0.018776	0.060126	0.877992	1303	0.98122	0.98125	1	18583
XCR1	0.018778	0.060128	0.877992	1304	0.43131	0.48561	1	9160
CXCR2	0.018802	0.060198	0.877992	1305	0.75913	0.75887	1	14337
UBE2D4	0.018803	0.060199	0.877992	1306	0.9812	0.98122	1	18582
ZWINT	0.018845	0.060313	0.877992	1307	0.98115	0.98118	1	18581
SERF1A	0.018845	0.060313	0.877992	1308	0.98115	0.98118	1	18580
LARP4B	0.018846	0.060315	0.877992	1309	0.96741	0.96744	1	18286
PHOSPHO2	0.018855	0.060346	0.877992	1310	0.72421	0.72399	1	13706
ZNF770	0.018855	0.060346	0.877992	1311	0.94722	0.94728	1	17878
KATNA1	0.018864	0.060369	0.877992	1312	0.55227	0.56966	1	10776
ZCCHC12	0.018864	0.060369	0.877992	1313	0.28093	0.39815	1	7548
KRT71	0.018876	0.060404	0.877992	1314	0.93992	0.94002	1	17721
OTUB1	0.018927	0.060556	0.879094	1315	0.98107	0.98109	1	18579
LGALS9	0.018933	0.060572	0.879094	1316	0.50077	0.53207	1	10032
TMPRSS11B	0.018955	0.060636	0.879176	1317	0.98104	0.98107	1	18578
ING4	0.018969	0.060669	0.879176	1318	0.93744	0.93754	1	17666
RNF216	0.019067	0.060975	0.880887	1319	0.98093	0.98098	1	18577
CYP4A11	0.019072	0.06099	0.880887	1320	0.24674	0.36626	1	6922
POP7	0.019076	0.061003	0.880887	1321	0.95751	0.95753	1	18076
GTSE1	0.019103	0.061073	0.880887	1322	0.9809	0.98094	1	18576
PSMG1	0.019113	0.061102	0.880887	1323	0.88816	0.88811	1	16745
EXOC2	0.019122	0.061129	0.880887	1324	0.98088	0.98092	1	18575
LIPT2	0.01914	0.06118	0.880887	1325	0.63891	0.64145	1	12137
KMT2A	0.01914	0.06118	0.880887	1326	0.62906	0.63272	1	11965
ALKBH6	0.01916	0.061236	0.880887	1327	0.80642	0.80633	1	15235
TRAF5	0.01917	0.061272	0.880887	1328	0.98083	0.98086	1	18574
FAM117A	0.019179	0.061294	0.880887	1329	0.015101	0.040565	0.917119	842
SPDL1	0.019211	0.061382	0.881482	1330	0.98079	0.98083	1	18573
ADORA2A	0.019243	0.061488	0.881829	1331	0.22786	0.343	1	6477
ELAC1	0.019256	0.061522	0.881829	1332	0.97906	0.9792	1	18538
C7orf26	0.019286	0.061621	0.881829	1333	0.77675	0.77647	1	14655
DENND6A	0.019295	0.061654	0.881829	1334	0.61269	0.61851	1	11701
P2RX6	0.019296	0.061659	0.881829	1335	0.71469	0.71434	1	13532
IL9R	0.019306	0.061683	0.881829	1336	0.60437	0.61147	1	11571
KCNG1	0.019347	0.06181	0.882983	1337	0.79423	0.79417	1	15009
DEFB135	0.019398	0.061966	0.883194	1338	0.34661	0.4344	1	8214
CXCR1	0.019426	0.062035	0.883194	1339	0.98057	0.98063	1	18571
SUGCT	0.019455	0.06212	0.883194	1340	0.68768	0.68752	1	12972
FAM104A	0.019463	0.062146	0.883194	1341	0.27183	0.39329	1	7459
CYTIP	0.019463	0.062146	0.883194	1342	0.34549	0.43376	1	8201
GINS3	0.019463	0.062146	0.883194	1343	0.61084	0.6169	1	11668
PLEKHG1	0.019463	0.062148	0.883194	1344	0.97994	0.98002	1	18558
HSD17B1	0.019527	0.062315	0.88425	1345	0.57715	0.58912	1	11137
KIF1A	0.019527	0.062315	0.88425	1346	0.96995	0.97001	1	18349
MINA	0.019607	0.062526	0.884847	1347	0.087706	0.16719	0.989014	3219
P2RY14	0.019612	0.062544	0.884847	1348	0.98039	0.98046	1	18570
RARB	0.019623	0.062575	0.884847	1349	0.98038	0.98044	1	18568
FAM184B	0.019625	0.062584	0.884847	1350	0.90014	0.9001	1	16947
NXPH4	0.019678	0.062744	0.884847	1351	0.98032	0.9804	1	18567
FRMD6	0.019683	0.062755	0.884847	1352	0.55328	0.57045	1	10788
SPATA24	0.019683	0.062755	0.884847	1353	0.54053	0.56083	1	10611
AADACL3	0.019687	0.062767	0.884847	1354	0.7784	0.77811	1	14686
PHYHD1	0.019699	0.062807	0.884847	1355	0.72373	0.72352	1	13694
DSCAM	0.019703	0.06282	0.884847	1356	0.9803	0.98038	1	18565
CREBBP	0.019761	0.062993	0.886585	1357	0.98024	0.98032	1	18564
AAGAB	0.019809	0.063142	0.886585	1358	0.48195	0.51905	1	9793
TSPAN17	0.01984	0.063228	0.886585	1359	0.98016	0.98024	1	18562
FOXO6	0.01984	0.063228	0.886585	1360	0.16799	0.26847	1	5114
NUP160	0.019887	0.063385	0.886585	1361	0.31429	0.41626	1	7889
DHX9	0.019887	0.063385	0.886585	1362	0.637	0.63972	1	12106
WDR77	0.019887	0.063385	0.886585	1363	0.91307	0.91306	1	17210
SRPR	0.019888	0.063389	0.886585	1364	0.98011	0.98019	1	18561
CD1A	0.019967	0.063623	0.886585	1365	0.68806	0.68789	1	12979
GABRG3	0.019987	0.063676	0.886585	1366	0.98001	0.98009	1	18560
MUC15	0.020003	0.063714	0.886585	1367	0.98	0.98008	1	18559
FAM69B	0.020091	0.063965	0.886585	1368	0.16171	0.26056	1	4964
UBE2G1	0.020116	0.06403	0.886585	1369	0.97465	0.97479	1	18444
PDE1C	0.020147	0.064123	0.886585	1370	0.97985	0.97996	1	18556
RAB12	0.020179	0.064205	0.886585	1371	0.80299	0.80288	1	15170
AKR1C1	0.020183	0.064217	0.886585	1372	0.93516	0.93527	1	17617
TUSC3	0.020189	0.064239	0.886585	1373	0.39433	0.46265	1	8718
MATK	0.020199	0.064266	0.886585	1374	0.75085	0.75061	1	14181
PRR23C	0.020199	0.064266	0.886585	1375	0.40804	0.47105	1	8863
C1QTNF2	0.020199	0.064266	0.886585	1376	0.54464	0.56388	1	10663
MT1M	0.020199	0.064266	0.886585	1377	0.012216	0.033764	0.900888	714
C3orf33	0.020199	0.064266	0.886585	1378	0.024918	0.062804	0.950726	1252
C19orf70	0.020199	0.064266	0.886585	1379	0.039343	0.094247	0.957222	1872
EFHC2	0.020199	0.064266	0.886585	1380	0.14511	0.2398	1	4556
NSG1	0.020199	0.064266	0.886585	1381	0.37472	0.45083	1	8501
ABCC5	0.020203	0.06428	0.886585	1382	0.9798	0.9799	1	18555
ATP6AP1	0.02025	0.064414	0.886585	1383	0.95795	0.95799	1	18083
UBFD1	0.02025	0.064414	0.886585	1384	0.20718	0.31732	1	6022
FMO5	0.020253	0.064424	0.886585	1385	0.97975	0.97986	1	18554
MST1R	0.020283	0.06451	0.886585	1386	0.87325	0.8732	1	16474
ANKRD31	0.020308	0.064586	0.886585	1387	0.97969	0.97981	1	18551
GCC2	0.020343	0.064681	0.886585	1388	0.91977	0.91988	1	17330
MYOF	0.020365	0.064752	0.886585	1389	0.97964	0.97976	1	18550
GOLGA6L10	0.020385	0.064804	0.886585	1390	0.0012846	0.0046203	0.752669	116
FRMPD2	0.020414	0.064885	0.886585	1391	0.90807	0.90807	1	17103
FABP9	0.020414	0.064885	0.886585	1392	0.60428	0.6114	1	11568
T	0.020432	0.06494	0.886585	1393	0.80434	0.80426	1	15194
EEF1E1	0.02044	0.064969	0.886585	1394	0.97956	0.97969	1	18549
NPBWR1	0.020454	0.065005	0.886585	1395	0.97955	0.97967	1	18548
DUS3L	0.020469	0.065053	0.886585	1396	0.95176	0.95181	1	17978
C9orf3	0.020483	0.065098	0.886585	1397	0.81428	0.8142	1	15381
NMBR	0.020495	0.065132	0.886585	1398	0.80755	0.80746	1	15258
SPATA13	0.020507	0.065166	0.886585	1399	0.52217	0.54731	1	10331
HIST2H4A	0.020562	0.065323	0.886585	1400	0.97944	0.97956	1	18547
VPS36	0.020576	0.065365	0.886585	1401	0.97942	0.97955	1	18546
PLXDC1	0.020582	0.065386	0.886585	1402	0.97942	0.97954	1	18545
UGT1A3	0.020593	0.065415	0.886585	1403	0.92646	0.92663	1	17447
GAPDHS	0.020602	0.065442	0.886585	1404	0.81208	0.81199	1	15345
CRY2	0.020612	0.065476	0.886585	1405	0.77783	0.77754	1	14678
SEC23A	0.020612	0.065477	0.886585	1406	0.86136	0.86118	1	16262
OR4D10	0.020655	0.065585	0.886585	1407	0.91099	0.91096	1	17158
CSH1	0.020672	0.065637	0.886585	1408	0.56604	0.58033	1	10957
INS	0.020691	0.065694	0.886585	1409	0.75021	0.74994	1	14170
KIAA1211	0.020694	0.065703	0.886585	1410	0.97574	0.97592	1	18464
EFNA5	0.020714	0.06576	0.886585	1411	0.97929	0.97942	1	18543
TNFRSF13B	0.020736	0.065814	0.886585	1412	0.89145	0.89139	1	16803
EPB41L5	0.020742	0.06583	0.886585	1413	0.14009	0.23345	1	4440
HIST1H2AJ	0.020766	0.065901	0.886585	1414	0.19398	0.30085	1	5705
FN3KRP	0.020766	0.065901	0.886585	1415	0.96583	0.96587	1	18252
SLN	0.020779	0.065939	0.886585	1416	0.97922	0.97935	1	18542
GSTM2	0.020793	0.065982	0.886585	1417	0.55319	0.57039	1	10786
OSR2	0.020833	0.066098	0.886585	1418	0.97917	0.97931	1	18541
DNAH10	0.020837	0.066115	0.886585	1419	0.97916	0.9793	1	18540
RGS10	0.020843	0.066129	0.886585	1420	0.80419	0.8041	1	15189
KDM5D	0.0209	0.066285	0.886585	1421	0.9791	0.97923	1	18539
FZD7	0.020934	0.066383	0.886585	1422	0.79001	0.78989	1	14911
REEP1	0.020962	0.066468	0.886585	1423	0.50255	0.53329	1	10056
GAL3ST4	0.020966	0.066477	0.886585	1424	0.55617	0.57264	1	10824
ACTR3C	0.020977	0.066506	0.886585	1425	0.77214	0.7719	1	14573
CTDSP2	0.020979	0.066513	0.886585	1426	0.43855	0.49019	1	9252
PTK2B	0.021004	0.066593	0.886585	1427	0.979	0.97913	1	18537
NAA60	0.021026	0.066644	0.886585	1428	0.89349	0.8934	1	16841
ALPP	0.021026	0.066644	0.886585	1429	0.87367	0.87361	1	16478
VPS41	0.021026	0.066644	0.886585	1430	0.42496	0.48161	1	9078
TRIM56	0.021026	0.066644	0.886585	1431	0.71765	0.71737	1	13586
EEA1	0.021026	0.066644	0.886585	1432	0.3251	0.42216	1	7993
EML6	0.021034	0.066665	0.886585	1433	0.96116	0.96115	1	18156
STX6	0.021058	0.066737	0.886585	1434	0.97894	0.97908	1	18535
CTDNEP1	0.021107	0.066873	0.886585	1435	0.92589	0.92604	1	17433
TMEM106B	0.021107	0.066873	0.886585	1436	0.94645	0.94649	1	17858
STAP2	0.021123	0.066925	0.886585	1437	0.41041	0.47251	1	8894
QRICH1	0.021125	0.066932	0.886585	1438	0.51751	0.54392	1	10270
ZDBF2	0.021133	0.06696	0.886585	1439	0.33419	0.42729	1	8088
NOTCH2NL	0.021176	0.067082	0.886585	1440	0.97882	0.97896	1	18533
AVEN	0.021189	0.067121	0.886585	1441	0.19074	0.29685	1	5623
ZNF423	0.021278	0.067372	0.886585	1442	0.86579	0.86569	1	16333
DMXL1	0.021289	0.067398	0.886585	1443	0.46446	0.5072	1	9576
ST3GAL2	0.021332	0.067514	0.886585	1444	0.97867	0.97882	1	18530
HSPA4L	0.021335	0.067521	0.886585	1445	0.16451	0.26408	1	5024
C20orf196	0.021348	0.067553	0.886585	1446	0.91037	0.91035	1	17150
BRINP3	0.021361	0.067587	0.886585	1447	0.0011717	0.0042349	0.747343	107
SPDEF	0.021361	0.067587	0.886585	1448	0.26331	0.38677	1	7330
AP1B1	0.021361	0.067587	0.886585	1449	0.34461	0.43327	1	8192
MAN1B1	0.021361	0.067587	0.886585	1450	0.91686	0.9169	1	17275
MYO5A	0.021382	0.067648	0.886585	1451	0.97862	0.97876	1	18529
MTG2	0.021392	0.067675	0.886585	1452	0.97861	0.97875	1	18528
DES	0.021419	0.067749	0.886585	1453	0.57344	0.58612	1	11080
GPATCH1	0.021426	0.067767	0.886585	1454	0.97857	0.97873	1	18527
RBM27	0.021429	0.067774	0.886585	1455	0.97857	0.97872	1	18526
AMY1C	0.021435	0.067792	0.886585	1456	0.97857	0.97872	1	18524
TNIP1	0.021435	0.067792	0.886585	1457	0.97857	0.97872	1	18525
TUBA3D	0.021453	0.067854	0.886585	1458	0.3868	0.45803	1	8635
GRM4	0.021456	0.06786	0.886585	1459	0.1969	0.30446	1	5774
PCDHB2	0.021523	0.068052	0.887126	1460	0.97848	0.97863	1	18523
ITGB5	0.021549	0.068132	0.887126	1461	0.97845	0.9786	1	18522
POLI	0.021561	0.068162	0.887126	1462	0.97844	0.97858	1	18521
GPRASP2	0.021568	0.06818	0.887126	1463	0.52485	0.54928	1	10378
TNXB	0.021568	0.06818	0.887126	1464	0.17696	0.27965	1	5319
UBE4A	0.021568	0.06818	0.887126	1465	0.0059154	0.01875	0.827711	432
ATP5C1	0.021637	0.068366	0.888804	1466	0.97836	0.97852	1	18520
DDX24	0.021646	0.068402	0.888804	1467	0.38891	0.45934	1	8658
HTR2A	0.021722	0.068626	0.891113	1468	0.86829	0.86817	1	16376
HTR5A	0.021825	0.068908	0.893348	1469	0.97817	0.97834	1	18516
CDC42BPA	0.021826	0.068911	0.893348	1470	0.7193	0.71905	1	13616
CHTF8	0.021868	0.069027	0.893348	1471	0.97813	0.9783	1	18514
LEPROTL1	0.021876	0.069046	0.893348	1472	0.97812	0.97829	1	18513
FAM129B	0.021876	0.069049	0.893348	1473	0.53103	0.55371	1	10468
ING3	0.021891	0.056221	0.871243	1474	0.62042	0.62068	1	11829
CCKAR	0.021894	0.069097	0.893348	1475	0.97811	0.97827	1	18512
TCEB3	0.021903	0.069125	0.893348	1476	0.75886	0.7586	1	14330
C11orf30	0.021927	0.069186	0.893534	1477	0.97807	0.97823	1	18511
AADACL4	0.021959	0.06929	0.894261	1478	0.97804	0.97821	1	18510
ZNF580	0.02198	0.069346	0.894379	1479	0.21428	0.32623	1	6186
TTI1	0.022029	0.069483	0.895552	1480	0.050334	0.11742	0.967271	2315
UBXN7	0.022087	0.069648	0.897064	1481	0.75647	0.75627	1	14284
PCDHA7	0.022135	0.069788	0.897669	1482	0.10097	0.18394	0.990942	3543
PPIAL4A	0.022135	0.069788	0.897669	1483	0.064052	0.13678	0.985644	2643
N4BP2	0.022162	0.069864	0.897742	1484	0.91775	0.91778	1	17289
KY	0.022174	0.069903	0.897742	1485	0.97783	0.97801	1	18508
SYF2	0.022186	0.069935	0.897742	1486	0.97781	0.978	1	18507
GRINA	0.022221	0.07003	0.898198	1487	0.97778	0.97797	1	18505
NELL1	0.022234	0.070065	0.898198	1488	0.87276	0.87269	1	16462
SCN3A	0.022251	0.070118	0.898279	1489	0.97775	0.97794	1	18504
TOMM40	0.022295	0.070243	0.899276	1490	0.9447	0.94475	1	17813
RAB9B	0.022342	0.07038	0.900185	1491	0.89691	0.89684	1	16885
ZKSCAN3	0.022353	0.070408	0.900185	1492	0.79378	0.79372	1	14993
ANP32B	0.02238	0.070483	0.900543	1493	0.47687	0.51557	1	9730
METTL17	0.022432	0.070624	0.900947	1494	0.97757	0.97777	1	18503
USP17L10	0.022441	0.070646	0.900947	1495	0.85644	0.85633	1	16172
UBN2	0.022445	0.070656	0.900947	1496	0.033946	0.082678	0.95668	1641
DUSP19	0.022465	0.070715	0.901099	1497	0.97754	0.97774	1	18502
C1orf87	0.022514	0.07085	0.901903	1498	0.18477	0.28942	1	5479
AMDHD2	0.022521	0.070873	0.901903	1499	0.97748	0.97768	1	18501
PRAMEF10	0.022554	0.070968	0.901987	1500	0.18837	0.29388	1	5562
EMC1	0.022556	0.070974	0.901987	1501	0.97744	0.97764	1	18500
DPCR1	0.022599	0.071094	0.902315	1502	0.05931	0.13065	0.983151	2535
SASS6	0.022599	0.071094	0.902315	1503	0.19661	0.30411	1	5766
IP6K1	0.022715	0.071413	0.904418	1504	0.36403	0.44453	1	8390
PLA2G4D	0.022715	0.071413	0.904418	1505	0.19881	0.30683	1	5819
USP16	0.022754	0.071536	0.904418	1506	0.46636	0.50845	1	9602
NFRKB	0.022768	0.071582	0.904418	1507	0.51107	0.53929	1	10169
FAM207A	0.022777	0.071604	0.904418	1508	0.82407	0.82404	1	15560
ARTN	0.022808	0.071691	0.904418	1509	0.053074	0.12261	0.97121	2407
LIPN	0.02282	0.071727	0.904418	1510	0.94622	0.94625	1	17855
GALNT11	0.022833	0.071757	0.904418	1511	0.69955	0.69934	1	13218
GOLGA4	0.022873	0.071856	0.904418	1512	0.97713	0.97734	1	18498
EPB41L4B	0.022883	0.071883	0.904418	1513	0.84816	0.84801	1	16016
IL6R	0.022883	0.071883	0.904418	1514	0.012598	0.034631	0.90101	733
EGR2	0.022924	0.071994	0.904418	1515	0.88399	0.88395	1	16656
SLIT1	0.022935	0.072021	0.904418	1516	0.90768	0.90767	1	17091
CTCF	0.022939	0.07203	0.904418	1517	0.97706	0.97727	1	18497
ZC3H15	0.022968	0.07212	0.904418	1518	0.58431	0.59498	1	11234
HIST3H3	0.02301	0.072246	0.904418	1519	0.80102	0.80094	1	15131
SUV420H1	0.023033	0.072309	0.904418	1520	0.17719	0.27993	1	5329
DNAJB13	0.023039	0.072327	0.904418	1521	0.92086	0.92097	1	17348
UROD	0.023039	0.072327	0.904418	1522	0.61341	0.61911	1	11718
CREBRF	0.023044	0.072342	0.904418	1523	0.97696	0.97715	1	18494
TWISTNB	0.023086	0.07246	0.904418	1524	0.97691	0.97711	1	18492
GMPS	0.023086	0.07246	0.904418	1525	0.97691	0.97711	1	18491
PNPT1	0.023086	0.07246	0.904418	1526	0.97691	0.97711	1	18493
TCEA1	0.023153	0.072665	0.904418	1527	0.97685	0.97704	1	18490
JMJD6	0.023178	0.072728	0.904418	1528	0.97682	0.97701	1	18489
GRASP	0.023192	0.072774	0.904418	1529	0.6771	0.67714	1	12790
PDZD11	0.023192	0.072774	0.904418	1530	0.16295	0.26213	1	4991
MTRNR2L9	0.023192	0.072774	0.904418	1531	0.87857	0.87852	1	16569
CLPTM1L	0.023192	0.072774	0.904418	1532	0.8096	0.80953	1	15291
SP140	0.023192	0.072774	0.904418	1533	0.88599	0.88593	1	16698
PPAP2A	0.023192	0.072774	0.904418	1534	0.52733	0.55105	1	10413
CALB1	0.023234	0.072889	0.905265	1535	0.97677	0.97697	1	18488
GLS2	0.023306	0.073088	0.907146	1536	0.97669	0.97689	1	18487
C12orf74	0.023343	0.073192	0.907408	1537	0.7626	0.76235	1	14390
ZDHHC8	0.023384	0.073312	0.907408	1538	0.97662	0.97681	1	18484
MGME1	0.023441	0.073458	0.907408	1539	0.8795	0.8795	1	16583
IQCC	0.02345	0.073482	0.907408	1540	0.91449	0.91452	1	17238
NAA40	0.02346	0.073513	0.907408	1541	0.21521	0.32738	1	6210
URB1	0.023531	0.073724	0.907408	1542	0.97647	0.97665	1	18481
THOC3	0.023531	0.073724	0.907408	1543	0.97647	0.97665	1	18482
TM4SF5	0.023531	0.073724	0.907408	1544	0.97647	0.97665	1	18483
CXorf38	0.02354	0.073753	0.907408	1545	0.80506	0.80496	1	15207
WNT5A	0.023553	0.073785	0.907408	1546	0.93498	0.93509	1	17610
NFS1	0.023572	0.07384	0.907408	1547	0.97643	0.97662	1	18480
CSNK2B	0.023577	0.073854	0.907408	1548	0.59711	0.60545	1	11451
PAPSS1	0.023577	0.073854	0.907408	1549	0.77472	0.77444	1	14620
LGALS3BP	0.023586	0.073877	0.907408	1550	0.97591	0.9761	1	18467
C12orf29	0.023609	0.073951	0.907408	1551	0.97639	0.97658	1	18479
SMIM6	0.023619	0.073977	0.907408	1552	0.97638	0.97657	1	18478
COMP	0.023627	0.074	0.907408	1553	0.97637	0.97656	1	18477
C14orf39	0.02363	0.074011	0.907408	1554	0.16275	0.26188	1	4985
PVRL1	0.023699	0.074213	0.907627	1555	0.60071	0.60844	1	11501
ZNF248	0.023738	0.074325	0.907627	1556	0.97626	0.97646	1	18476
NKIRAS2	0.023748	0.074358	0.907627	1557	0.23968	0.35755	1	6759
CCDC159	0.023766	0.07441	0.907627	1558	0.59857	0.60666	1	11473
CLEC3B	0.023839	0.074616	0.907627	1559	0.97616	0.97635	1	18475
MRPL11	0.023848	0.074639	0.907627	1560	0.71514	0.71482	1	13543
PMPCA	0.023848	0.074639	0.907627	1561	0.91334	0.91335	1	17217
ZNF112	0.023886	0.074746	0.907627	1562	0.97611	0.97631	1	18474
MYBPC3	0.023902	0.074781	0.907627	1563	0.89978	0.89975	1	16941
KCNK4	0.023956	0.074947	0.907627	1564	0.95103	0.95108	1	17964
CCDC112	0.023959	0.074957	0.907627	1565	0.47493	0.51426	1	9709
S1PR2	0.023965	0.074975	0.907627	1566	0.8435	0.84334	1	15931
UGT2B17	0.023965	0.074975	0.907627	1567	0.38331	0.45594	1	8597
C20orf27	0.023965	0.074975	0.907627	1568	0.73592	0.73549	1	13924
PTPDC1	0.023965	0.074975	0.907627	1569	0.21232	0.32376	1	6140
C7orf57	0.023965	0.074975	0.907627	1570	0.24641	0.36583	1	6917
APOO	0.023965	0.074975	0.907627	1571	0.49962	0.53125	1	10021
VPS52	0.023965	0.074975	0.907627	1572	0.034253	0.083363	0.95668	1653
KCNA6	0.023967	0.074979	0.907627	1573	0.97603	0.97623	1	18472
TBC1D3	0.023996	0.075056	0.907757	1574	0.976	0.9762	1	18471
STK32B	0.024007	0.075084	0.907757	1575	0.97599	0.97619	1	18470
SUN2	0.024066	0.075262	0.908968	1576	0.97593	0.97612	1	18469
BTF3L4	0.024076	0.07528	0.908968	1577	0.97592	0.97611	1	18468
ZSWIM6	0.024116	0.075394	0.909775	1578	0.97588	0.97607	1	18466
GALR1	0.024156	0.075505	0.910538	1579	0.64976	0.65128	1	12328
CDY2B	0.024217	0.075683	0.911393	1580	0.97578	0.97596	1	18465
GALNT14	0.024229	0.075719	0.911393	1581	0.58575	0.59617	1	11250
BPTF	0.024278	0.075858	0.911775	1582	0.97572	0.9759	1	18463
C17orf50	0.024295	0.075898	0.911775	1583	0.97571	0.97589	1	18462
KDM2A	0.024311	0.075944	0.911775	1584	0.97569	0.97587	1	18461
GLTSCR1L	0.024351	0.076048	0.911775	1585	0.7057	0.70538	1	13345
CREB3L4	0.024357	0.076063	0.911775	1586	0.91822	0.91824	1	17295
PARD6G	0.024373	0.076117	0.911775	1587	0.9497	0.94975	1	17930
FGF7	0.024379	0.076141	0.911775	1588	0.97562	0.9758	1	18458
OR52D1	0.024387	0.076163	0.911775	1589	0.93177	0.93188	1	17548
CYLC2	0.024394	0.07618	0.911775	1590	0.30031	0.40851	1	7746
CAMTA1	0.024427	0.076265	0.91222	1591	0.97557	0.97575	1	18457
TSG101	0.024454	0.076338	0.912523	1592	0.60246	0.60986	1	11531
BOLL	0.024506	0.076473	0.913547	1593	0.41767	0.47703	1	8989
ARHGAP29	0.024521	0.076519	0.913547	1594	0.97548	0.97566	1	18456
KLHL31	0.0246	0.076724	0.913775	1595	0.36772	0.44671	1	8434
LPP	0.024624	0.076802	0.913775	1596	0.97538	0.97555	1	18455
KRTCAP3	0.024664	0.076904	0.913775	1597	0.15877	0.25692	1	4890
NPY5R	0.024714	0.077041	0.913775	1598	0.97529	0.97547	1	18454
QPCTL	0.024737	0.077096	0.913775	1599	0.6083	0.61474	1	11630
CNNM2	0.024738	0.077097	0.913775	1600	0.093257	0.17427	0.989014	3355
KCNC4	0.024746	0.077124	0.913775	1601	0.97525	0.97543	1	18453
CHPF	0.024756	0.077152	0.913775	1602	0.17787	0.28079	1	5345
DNAJB1	0.024781	0.077229	0.913775	1603	0.97522	0.9754	1	18452
CCDC97	0.024792	0.077266	0.913775	1604	0.97521	0.97538	1	18451
CNEP1R1	0.024793	0.077269	0.913775	1605	0.13686	0.22934	1	4357
TMOD2	0.024841	0.077399	0.913775	1606	0.44723	0.49583	1	9353
WDR5B	0.024841	0.077399	0.913775	1607	0.26504	0.38887	1	7373
LMTK2	0.024841	0.077399	0.913775	1608	0.066198	0.13962	0.985644	2692
LYSMD4	0.024841	0.077399	0.913775	1609	0.88051	0.88048	1	16603
RBPJ	0.024841	0.077399	0.913775	1610	0.61731	0.62247	1	11769
BRINP2	0.024841	0.077399	0.913775	1611	0.061355	0.13329	0.985644	2577
TTC32	0.024841	0.077399	0.913775	1612	0.26523	0.38908	1	7378
FAM160A1	0.024933	0.077667	0.915966	1613	0.97507	0.97523	1	18450
ASIC4	0.024945	0.077699	0.915966	1614	0.6951	0.6949	1	13124
PRSS57	0.02498	0.077789	0.915966	1615	0.93625	0.93631	1	17645
CNTD1	0.02501	0.077868	0.915966	1616	0.13752	0.23019	1	4371
TKFC	0.02501	0.077868	0.915966	1617	0.89813	0.89805	1	16913
AKT3	0.025023	0.077907	0.915966	1618	0.94708	0.94715	1	17875
DLGAP4	0.025028	0.07792	0.915966	1619	0.034288	0.083429	0.95668	1654
CHMP1A	0.025054	0.077986	0.916145	1620	0.97495	0.9751	1	18449
DMBX1	0.025072	0.063836	0.886585	1621	0.97493	0.97509	1	18448
CCDC8	0.025072	0.078032	0.916145	1622	0.65633	0.65737	1	12441
NATD1	0.025124	0.078189	0.916145	1623	0.87375	0.87369	1	16480
GEN1	0.025138	0.078225	0.916145	1624	0.92224	0.92239	1	17374
OSBPL9	0.025138	0.078225	0.916145	1625	0.97468	0.97483	1	18445
RTFDC1	0.025138	0.078225	0.916145	1626	0.66397	0.66444	1	12573
ERP29	0.025155	0.078271	0.916145	1627	0.97485	0.975	1	18447
ZNF114	0.025175	0.078331	0.916287	1628	0.04443	0.10511	0.962432	2073
SLC12A6	0.025209	0.078429	0.916317	1629	0.38582	0.45745	1	8621
LENG1	0.025209	0.078429	0.916317	1630	0.92623	0.92639	1	17440
SAP130	0.025252	0.07855	0.916931	1631	0.73973	0.73933	1	14005
AP3S2	0.025311	0.078721	0.916931	1632	0.43038	0.48502	1	9147
ECHDC3	0.025319	0.078745	0.916931	1633	0.97468	0.97483	1	18446
LTBP3	0.02533	0.078776	0.916931	1634	0.93606	0.93613	1	17637
PGLYRP1	0.02534	0.078806	0.916931	1635	0.2387	0.35635	1	6737
MPP6	0.025357	0.078858	0.916931	1636	0.97464	0.97479	1	18443
ZMYND15	0.025362	0.078871	0.916931	1637	0.92302	0.92318	1	17382
CTBP1	0.025374	0.078893	0.916931	1638	0.6357	0.63854	1	12079
MBOAT4	0.025381	0.078913	0.916931	1639	0.90829	0.90828	1	17106
USP17L12	0.025432	0.079051	0.917745	1640	0.81832	0.81824	1	15456
MMS22L	0.025453	0.07911	0.917745	1641	0.63891	0.64145	1	12141
MAOA	0.025473	0.079165	0.917745	1642	0.79313	0.79303	1	14977
TRIM43	0.025507	0.079261	0.917745	1643	0.76862	0.76839	1	14511
NOTO	0.025582	0.079467	0.917745	1644	0.94992	0.94996	1	17938
CTSG	0.025587	0.079481	0.917745	1645	0.27583	0.39537	1	7502
ARL6IP6	0.025587	0.079481	0.917745	1646	0.59004	0.59965	1	11322
TNFAIP6	0.025587	0.079481	0.917745	1647	0.46656	0.50857	1	9607
FOXF1	0.025587	0.079481	0.917745	1648	0.75935	0.75908	1	14341
CHD7	0.025608	0.07954	0.917745	1649	0.481	0.51841	1	9781
SRSF6	0.025645	0.079648	0.917745	1650	0.97435	0.9745	1	18442
PRKG1	0.025649	0.079662	0.917745	1651	0.86911	0.86901	1	16389
LRP2BP	0.025652	0.07967	0.917745	1652	0.97435	0.9745	1	18441
SPOCK1	0.025698	0.079793	0.917745	1653	0.86768	0.86753	1	16364
GTF3C2	0.025732	0.079879	0.917745	1654	0.51376	0.54119	1	10216
AMZ1	0.025778	0.080003	0.917745	1655	0.21748	0.33018	1	6255
RTN1	0.025793	0.08005	0.917745	1656	0.8226	0.82255	1	15533
OXSR1	0.025811	0.080105	0.917745	1657	0.96905	0.96909	1	18322
FCRL3	0.025834	0.080174	0.917745	1658	0.70503	0.70473	1	13334
SF3B6	0.025853	0.080219	0.917745	1659	0.97415	0.97429	1	18439
NKX2-1	0.025905	0.08036	0.917745	1660	0.97409	0.97423	1	18438
LOC149373	0.025913	0.080377	0.917745	1661	0.24335	0.36202	1	6842
MAF1	0.025921	0.080401	0.917745	1662	0.69647	0.69625	1	13152
NUPL1	0.025921	0.080401	0.917745	1663	0.0064108	0.019969	0.837014	456
ZNF37A	0.025994	0.065989	0.886585	1664	0.24304	0.30762	1	6832
GSTCD	0.026004	0.080621	0.917745	1665	0.974	0.97413	1	18436
FRMD4A	0.02601	0.080642	0.917745	1666	0.42665	0.48264	1	9103
METTL10	0.026015	0.080655	0.917745	1667	0.97398	0.97412	1	18435
LGR6	0.02605	0.080745	0.917745	1668	0.17342	0.27528	1	5238
ARSJ	0.026069	0.080809	0.917745	1669	0.8954	0.89535	1	16864
RBBP8	0.026069	0.080809	0.917745	1670	0.75529	0.7551	1	14260
ACADVL	0.026079	0.080832	0.917745	1671	0.62609	0.63009	1	11917
TP53	0.026111	0.080933	0.917745	1672	0.97389	0.97403	1	18433
LRFN3	0.026121	0.080962	0.917745	1673	0.96724	0.96728	1	18281
DCTN1	0.026129	0.080987	0.917745	1674	0.97387	0.974	1	18432
UNC13A	0.026153	0.081051	0.917745	1675	0.71389	0.71352	1	13511
DCDC2B	0.026172	0.081113	0.917745	1676	0.96421	0.96426	1	18223
MREG	0.026177	0.081132	0.917745	1677	0.97382	0.97395	1	18431
TMPRSS11F	0.026202	0.0812	0.917745	1678	0.47353	0.51331	1	9689
APBB1	0.026204	0.081208	0.917745	1679	0.59593	0.60448	1	11433
TRPA1	0.026207	0.081215	0.917745	1680	0.54103	0.56117	1	10615
TESPA1	0.026225	0.08127	0.917745	1681	0.50869	0.53761	1	10136
ZSCAN9	0.026281	0.081428	0.917745	1682	0.031816	0.077984	0.95668	1544
CRYZL1	0.026283	0.081433	0.917745	1683	0.97372	0.97385	1	18429
ZCCHC8	0.026288	0.08145	0.917745	1684	0.97371	0.97385	1	18428
C8orf76	0.026303	0.0815	0.917745	1685	0.92134	0.92147	1	17356
ADAM17	0.02634	0.0816	0.917745	1686	0.97366	0.9738	1	18427
ADAT2	0.026348	0.081616	0.917745	1687	0.36483	0.445	1	8400
ARHGAP15	0.026355	0.081638	0.917745	1688	0.97364	0.97379	1	18426
WAC	0.026358	0.081646	0.917745	1689	0.42613	0.48232	1	9098
MZF1	0.026393	0.08174	0.917745	1690	0.97361	0.97374	1	18425
FAM109B	0.026401	0.066945	0.886585	1691	0.9736	0.97374	1	18424
ARMCX1	0.026419	0.081818	0.917745	1692	0.74062	0.74028	1	14019
YPEL1	0.026436	0.081858	0.917745	1693	0.55414	0.5711	1	10797
DGKD	0.026449	0.081885	0.917745	1694	0.86462	0.8645	1	16310
FAM109A	0.026463	0.081924	0.917745	1695	0.94979	0.94984	1	17935
RNF181	0.026471	0.081943	0.917745	1696	0.84598	0.84584	1	15974
HLA-G	0.026481	0.081969	0.917745	1697	0.77431	0.77404	1	14612
UTP14C	0.0265	0.08201	0.917745	1698	0.91246	0.91245	1	17195
DUSP5	0.026509	0.082031	0.917745	1699	0.29709	0.40673	1	7712
ZKSCAN8	0.026538	0.08212	0.917745	1700	0.6695	0.66979	1	12661
RPL10L	0.026538	0.08212	0.917745	1701	0.31662	0.41752	1	7912
SNX15	0.026538	0.08212	0.917745	1702	0.29814	0.40731	1	7723
ADGRF4	0.02657	0.082225	0.917745	1703	0.79395	0.79389	1	14999
FFAR4	0.026585	0.082266	0.917745	1704	0.87824	0.87821	1	16559
ACTR2	0.026617	0.08235	0.917745	1705	0.97338	0.97353	1	18422
PRDM16	0.026622	0.082364	0.917745	1706	0.95687	0.95688	1	18066
MIOS	0.026627	0.082377	0.917745	1707	0.97337	0.97352	1	18421
FBXO42	0.026665	0.082501	0.917745	1708	0.97333	0.97349	1	18420
PUS7	0.026666	0.082503	0.917745	1709	0.90858	0.90857	1	17112
CYP4Z1	0.026678	0.082533	0.917745	1710	0.97332	0.97348	1	18419
DLD	0.026679	0.082537	0.917745	1711	0.75425	0.75406	1	14246
OR4F4	0.026679	0.082537	0.917745	1712	0.37844	0.45301	1	8545
MTMR12	0.026723	0.082673	0.917745	1713	0.97328	0.97343	1	18418
PM20D2	0.026754	0.082753	0.917745	1714	0.97325	0.9734	1	18417
AK8	0.026761	0.082777	0.917745	1715	0.91181	0.91179	1	17176
MED21	0.026761	0.082777	0.917745	1716	0.0096436	0.027681	0.874552	605
C19orf33	0.026795	0.082871	0.917745	1717	0.42948	0.48446	1	9136
GPR182	0.026835	0.082983	0.917745	1718	0.97316	0.9733	1	18416
SLC38A1	0.026886	0.083122	0.917745	1719	0.8783	0.87827	1	16562
MLST8	0.026901	0.08317	0.917745	1720	0.91847	0.91851	1	17297
UGCG	0.026909	0.08319	0.917745	1721	0.89437	0.89432	1	16853
TRAF3IP1	0.026909	0.08319	0.917745	1722	0.42696	0.48284	1	9108
SYNE1	0.026924	0.083237	0.917745	1723	0.85849	0.85831	1	16214
VPS72	0.026961	0.083339	0.917745	1724	0.97304	0.97318	1	18414
FIGNL2	0.026975	0.08337	0.917745	1725	0.69109	0.69093	1	13033
C9orf92	0.026999	0.083429	0.917745	1726	0.973	0.97315	1	18413
CDC6	0.027006	0.083447	0.917745	1727	0.97299	0.97314	1	18412
SLC35D1	0.027027	0.083505	0.917745	1728	0.88025	0.88022	1	16597
OR13D1	0.027027	0.083505	0.917745	1729	0.65224	0.65356	1	12370
S100A13	0.027046	0.083565	0.917745	1730	0.97295	0.9731	1	18411
SIGLECL1	0.027149	0.08385	0.917745	1731	0.50566	0.53545	1	10090
ARF5	0.02717	0.083916	0.917745	1732	0.94457	0.94463	1	17808
ASB13	0.02721	0.084036	0.917745	1733	0.97279	0.97294	1	18410
CFAP74	0.027216	0.084056	0.917745	1734	0.55743	0.57364	1	10838
MZT2B	0.027232	0.084103	0.917745	1735	0.87041	0.87029	1	16414
BBS5	0.027232	0.084103	0.917745	1736	0.20077	0.30929	1	5862
COL5A2	0.027232	0.084103	0.917745	1737	0.3864	0.45781	1	8630
SPIRE2	0.027235	0.084108	0.917745	1738	0.18078	0.28439	1	5398
OSBPL2	0.027248	0.084136	0.917745	1739	0.6937	0.69355	1	13095
DPPA4	0.027254	0.084159	0.917745	1740	0.25624	0.37794	1	7164
INTS4	0.027315	0.084324	0.917745	1741	0.97268	0.97284	1	18409
SPANXA2	0.027372	0.084471	0.917745	1742	0.97263	0.97278	1	18408
AKAP12	0.027389	0.084517	0.917745	1743	0.97261	0.97276	1	18407
C3AR1	0.027397	0.084538	0.917745	1744	0.072213	0.14734	0.985644	2841
RFWD3	0.027417	0.084593	0.917745	1745	0.97258	0.97273	1	18406
RASD1	0.027418	0.084595	0.917745	1746	0.31407	0.41614	1	7884
EVX2	0.027418	0.084595	0.917745	1747	0.54789	0.56635	1	10711
WDR6	0.027438	0.084649	0.917745	1748	0.66935	0.66966	1	12658
C22orf46	0.027438	0.084649	0.917745	1749	0.66039	0.66113	1	12515
C14orf28	0.027438	0.084649	0.917745	1750	0.098607	0.18094	0.990398	3490
KNSTRN	0.027442	0.08466	0.917745	1751	0.84301	0.84285	1	15920
OR6B3	0.027577	0.085038	0.917745	1752	0.66498	0.66545	1	12585
SATL1	0.02758	0.085049	0.917745	1753	0.97242	0.97256	1	18405
BBS7	0.027592	0.085081	0.917745	1754	0.81181	0.81172	1	15339
ATP2B3	0.02762	0.085166	0.917745	1755	0.97238	0.97253	1	18404
ABHD11	0.02766	0.085278	0.917745	1756	0.97234	0.97249	1	18403
MCM4	0.027666	0.085295	0.917745	1757	0.49417	0.52741	1	9940
MANSC4	0.027669	0.0853	0.917745	1758	0.13347	0.22501	1	4292
KLF8	0.027679	0.085337	0.917745	1759	0.91751	0.91755	1	17285
B4GALNT3	0.027688	0.08537	0.917745	1760	0.93428	0.93438	1	17596
COL7A1	0.027695	0.085384	0.917745	1761	0.69925	0.69903	1	13212
PKN3	0.027698	0.085394	0.917745	1762	0.9723	0.97244	1	18402
PYGO1	0.027763	0.085592	0.917745	1763	0.51547	0.54242	1	10243
CH25H	0.027766	0.085599	0.917745	1764	0.97223	0.97237	1	18401
LTBR	0.027772	0.085619	0.917745	1765	0.9465	0.94655	1	17860
CARF	0.027772	0.085619	0.917745	1766	0.54613	0.56502	1	10688
RGMB	0.027849	0.085834	0.917745	1767	0.56772	0.58163	1	10987
KCTD14	0.027854	0.085846	0.917745	1768	0.8731	0.87305	1	16470
SUSD4	0.027855	0.085846	0.917745	1769	0.97215	0.97229	1	18400
RNASEH1	0.027902	0.085967	0.917745	1770	0.93397	0.93404	1	17594
LRRC6	0.027903	0.085971	0.917745	1771	0.95359	0.95362	1	18010
OR2S2	0.027924	0.08603	0.917745	1772	0.64543	0.64731	1	12246
AAR2	0.027957	0.08611	0.917745	1773	0.97204	0.97218	1	18399
PDIA3	0.028003	0.086245	0.917745	1774	0.78018	0.77992	1	14722
COA4	0.028003	0.086245	0.917745	1775	0.23031	0.346	1	6538
TMEM194A	0.028003	0.086245	0.917745	1776	0.10928	0.19453	0.994545	3718
MSL2	0.028003	0.086245	0.917745	1777	0.69662	0.69639	1	13154
NOP9	0.028003	0.086245	0.917745	1778	0.7549	0.75471	1	14254
SF3A2	0.028007	0.086258	0.917745	1779	0.97199	0.97213	1	18397
COQ2	0.028007	0.086258	0.917745	1780	0.97199	0.97213	1	18398
SMAD3	0.028067	0.086409	0.917745	1781	0.28326	0.39938	1	7572
PRSS2	0.028088	0.086476	0.917745	1782	0.96021	0.96024	1	18136
PRDX3	0.02809	0.086479	0.917745	1783	0.97191	0.97206	1	18396
ZFR	0.028125	0.086575	0.917745	1784	0.84742	0.84726	1	16000
UPF2	0.028147	0.086633	0.917745	1785	0.97185	0.97199	1	18395
CSNK1E	0.028204	0.08678	0.917745	1786	0.18307	0.28729	1	5438
NFE2L3	0.028208	0.086794	0.917745	1787	0.54604	0.56496	1	10687
DALRD3	0.028294	0.087027	0.917745	1788	0.22592	0.34061	1	6435
FZD4	0.028311	0.08707	0.917745	1789	0.11661	0.2038	0.994545	3901
SH2D6	0.028321	0.087103	0.917745	1790	0.46872	0.51003	1	9636
DPH3P1	0.028322	0.087106	0.917745	1791	0.95066	0.95072	1	17960
TAF5L	0.028381	0.087272	0.917745	1792	0.62443	0.62864	1	11894
TMEM68	0.028388	0.08729	0.917745	1793	0.97161	0.97173	1	18394
KCNK5	0.028432	0.087418	0.917745	1794	0.97157	0.9717	1	18392
PROS1	0.02845	0.087461	0.917745	1795	0.97155	0.97168	1	18391
CLEC18A	0.028455	0.087474	0.917745	1796	0.97154	0.97167	1	18390
CCL15	0.028486	0.087548	0.917745	1797	0.97151	0.97164	1	18389
POC1B-GALNT4	0.02849	0.087559	0.917745	1798	0.88531	0.88525	1	16682
COG6	0.02849	0.087559	0.917745	1799	0.73579	0.73537	1	13922
SHROOM1	0.028522	0.087652	0.917745	1800	0.97148	0.9716	1	18388
PLEKHF1	0.028584	0.087821	0.917745	1801	0.97142	0.97154	1	18387
LRRC39	0.028612	0.087896	0.917745	1802	0.65762	0.65858	1	12465
KLK14	0.028615	0.087902	0.917745	1803	0.90346	0.90348	1	17011
ELMSAN1	0.028619	0.087907	0.917745	1804	0.49643	0.52901	1	9981
CCNJL	0.028674	0.088064	0.917745	1805	0.94613	0.94617	1	17852
HSP90B1	0.028684	0.07229	0.904418	1806	0.97132	0.97148	1	18385
HOXC4	0.028709	0.088163	0.917745	1807	0.97129	0.9714	1	18384
CKLF-CMTM1	0.028713	0.088177	0.917745	1808	0.67613	0.67618	1	12772
KBTBD6	0.028738	0.088241	0.917745	1809	0.52907	0.55232	1	10439
DDX51	0.028747	0.088271	0.917745	1810	0.96934	0.9694	1	18328
MRPL38	0.028747	0.088271	0.917745	1811	0.13092	0.22183	1	4231
LOC401052	0.028752	0.088289	0.917745	1812	0.8499	0.84976	1	16048
ZDHHC4	0.028772	0.088345	0.917745	1813	0.73168	0.73138	1	13844
CDH26	0.028804	0.088443	0.917745	1814	0.9712	0.97131	1	18383
POLE3	0.028815	0.088479	0.917745	1815	0.97119	0.9713	1	18382
HES6	0.028818	0.08849	0.917745	1816	0.90021	0.90016	1	16948
HIST1H2BK	0.028841	0.088554	0.917745	1817	0.97116	0.97127	1	18381
ERCC8	0.02885	0.088579	0.917745	1818	0.7948	0.79473	1	15020
BYSL	0.028861	0.088608	0.917745	1819	0.97114	0.97125	1	18380
TIGD1	0.028886	0.088672	0.917745	1820	0.076718	0.15308	0.986136	2959
EIF2B2	0.028895	0.088706	0.917745	1821	0.628	0.63178	1	11948
SERTAD1	0.028895	0.088706	0.917745	1822	0.50177	0.53276	1	10047
DNAJC2	0.028903	0.088723	0.917745	1823	0.9711	0.9712	1	18378
CNTNAP1	0.028921	0.08878	0.917745	1824	0.97108	0.97118	1	18377
TMEM123	0.028943	0.088838	0.917745	1825	0.97106	0.97116	1	18376
APLNR	0.028977	0.088931	0.917745	1826	0.97102	0.97112	1	18375
MST1L	0.029014	0.08903	0.917745	1827	0.89665	0.89659	1	16882
CLCA2	0.029029	0.089068	0.917745	1828	0.24861	0.36858	1	6972
SAR1B	0.029033	0.08908	0.917745	1829	0.94212	0.9422	1	17759
SAGE1	0.029121	0.089332	0.917745	1830	0.62064	0.6253	1	11831
GPR37L1	0.029127	0.08935	0.917745	1831	0.27078	0.3927	1	7447
MSR1	0.029183	0.089516	0.917745	1832	0.20183	0.31059	1	5892
ZNF160	0.029183	0.089516	0.917745	1833	0.021671	0.05557	0.941924	1121
TRNAU1AP	0.029183	0.089516	0.917745	1834	0.15545	0.25271	1	4812
KRTAP6-3	0.029185	0.089521	0.917745	1835	0.91013	0.91012	1	17142
ZNF735	0.029274	0.089758	0.917745	1836	0.97073	0.97081	1	18373
SH2B2	0.029286	0.089793	0.917745	1837	0.062405	0.13465	0.985644	2598
FABP5	0.029301	0.08984	0.917745	1838	0.057849	0.12875	0.981219	2504
NHLRC1	0.029302	0.089845	0.917745	1839	0.9707	0.97077	1	18371
OR4S2	0.029362	0.090011	0.917745	1840	0.97064	0.97071	1	18370
ALDH8A1	0.029363	0.090012	0.917745	1841	0.61012	0.61628	1	11658
SCOC	0.029363	0.090012	0.917745	1842	0.21466	0.32669	1	6196
MBD2	0.02937	0.090031	0.917745	1843	0.83423	0.83419	1	15750
KIAA0355	0.029395	0.090096	0.917745	1844	0.79976	0.79967	1	15111
MPZ	0.029399	0.090103	0.917745	1845	0.9706	0.97068	1	18369
LRRC66	0.029415	0.090153	0.917745	1846	0.82016	0.82009	1	15487
DHX37	0.02942	0.073997	0.907408	1847	0.97058	0.97073	1	18368
RPS25	0.029459	0.090293	0.917745	1848	0.97054	0.97061	1	18367
ALDH1L2	0.029492	0.090386	0.917745	1849	0.97051	0.97058	1	18366
CARD16	0.029525	0.090476	0.917745	1850	0.70985	0.70948	1	13422
EXT2	0.029537	0.090513	0.917745	1851	0.97046	0.97053	1	18365
TEX30	0.029541	0.090518	0.917745	1852	0.97046	0.97053	1	18364
MAP1LC3A	0.029554	0.090561	0.917745	1853	0.96718	0.96722	1	18278
FUT6	0.029565	0.090581	0.917745	1854	0.24302	0.36161	1	6831
LEF1	0.029571	0.090601	0.917745	1855	0.97043	0.9705	1	18363
GCLM	0.029574	0.090618	0.917745	1856	0.73555	0.73516	1	13919
ANKMY1	0.029582	0.090635	0.917745	1857	0.97042	0.97049	1	18362
BAZ1B	0.029594	0.090667	0.917745	1858	0.13012	0.2208	1	4215
VAMP4	0.029594	0.090668	0.917745	1859	0.026642	0.066608	0.950726	1332
ADAM29	0.029614	0.090721	0.917745	1860	0.96486	0.96491	1	18236
PI16	0.029631	0.090763	0.917745	1861	0.97037	0.97044	1	18361
TFIP11	0.029689	0.090912	0.917745	1862	0.97031	0.97038	1	18360
XRCC2	0.029692	0.090916	0.917745	1863	0.91847	0.91851	1	17299
COPS2	0.029692	0.090916	0.917745	1864	0.96975	0.96979	1	18338
OTOL1	0.029709	0.09097	0.917745	1865	0.97029	0.97036	1	18359
IGSF10	0.02972	0.074698	0.907627	1866	0.77338	0.77363	1	14597
PIK3R1	0.02973	0.091032	0.917745	1867	0.97027	0.97034	1	18358
TERT	0.029735	0.091045	0.917745	1868	0.8574	0.85728	1	16192
SCN10A	0.029764	0.09114	0.917745	1869	0.63666	0.63939	1	12099
NUPL2	0.029768	0.091158	0.917745	1870	0.97023	0.9703	1	18357
GUCA1C	0.029779	0.09119	0.917745	1871	0.97022	0.97029	1	18356
ZASP	0.029788	0.091221	0.917745	1872	0.13864	0.23164	1	4397
KBTBD13	0.029799	0.091246	0.917745	1873	0.35799	0.44097	1	8328
SLC22A4	0.029799	0.091246	0.917745	1874	0.52039	0.54601	1	10304
MOG	0.029799	0.091246	0.917745	1875	0.56861	0.58233	1	11001
SSTR2	0.029799	0.091246	0.917745	1876	0.51614	0.54293	1	10253
NBAS	0.029799	0.091246	0.917745	1877	0.74904	0.74874	1	14154
CABLES1	0.029799	0.091246	0.917745	1878	0.13035	0.22108	1	4219
TBL1XR1	0.029824	0.091309	0.917745	1879	0.079433	0.15661	0.987214	3025
NPTX1	0.029845	0.091364	0.917745	1880	0.97016	0.97022	1	18355
ARGLU1	0.029904	0.091531	0.917745	1881	0.82299	0.82295	1	15538
ZNF670	0.029937	0.091618	0.917745	1882	0.73812	0.73771	1	13968
COA7	0.029948	0.091644	0.917745	1883	0.97005	0.97012	1	18353
TCEB1	0.029948	0.091644	0.917745	1884	0.97005	0.97012	1	18354
ARPC4	0.029948	0.091644	0.917745	1885	0.97005	0.97012	1	18352
OR51V1	0.029969	0.091708	0.917745	1886	0.082486	0.16053	0.989014	3097
TCP11	0.029988	0.091764	0.917745	1887	0.97001	0.97008	1	18351
MAD2L1BP	0.030001	0.091798	0.917745	1888	0.97	0.97006	1	18350
MT1F	0.030018	0.09184	0.917745	1889	0.082141	0.16009	0.989014	3087
KRTAP9-4	0.030035	0.091897	0.917745	1890	0.30838	0.41293	1	7826
PRSS50	0.030061	0.09198	0.917745	1891	0.93265	0.93275	1	17567
TMEM167A	0.030083	0.092027	0.917745	1892	0.96992	0.96997	1	18348
TSEN34	0.030109	0.092104	0.917745	1893	0.88351	0.88346	1	16644
TMX2	0.03011	0.092107	0.917745	1894	0.71709	0.71679	1	13577
GTF2H5	0.03011	0.092107	0.917745	1895	0.2554	0.3769	1	7143
CASC10	0.03011	0.092107	0.917745	1896	0.77705	0.77675	1	14663
GALE	0.030119	0.075598	0.911081	1897	0.96988	0.97005	1	18347
PEMT	0.030132	0.092162	0.917745	1898	0.070626	0.14531	0.985644	2805
CRYBA2	0.030135	0.092167	0.917745	1899	0.95681	0.95681	1	18064
NUMBL	0.030205	0.092373	0.917745	1900	0.13078	0.22163	1	4227
HSF5	0.030208	0.092379	0.917745	1901	0.94604	0.94608	1	17849
TNFRSF18	0.030216	0.09241	0.917745	1902	0.053829	0.12361	0.973271	2421
TCF25	0.030224	0.092429	0.917745	1903	0.94485	0.9449	1	17817
CCDC129	0.030243	0.09248	0.917745	1904	0.80247	0.80237	1	15159
GEMIN6	0.030254	0.092509	0.917745	1905	0.96975	0.96979	1	18339
C11orf57	0.030254	0.092509	0.917745	1906	0.96975	0.96979	1	18342
PTAR1	0.030254	0.092509	0.917745	1907	0.96975	0.96979	1	18336
ARHGEF17	0.030254	0.092509	0.917745	1908	0.96975	0.96979	1	18341
FANCA	0.030254	0.092509	0.917745	1909	0.96975	0.96979	1	18345
RPL4	0.030254	0.092509	0.917745	1910	0.96975	0.96979	1	18337
C21orf59	0.030254	0.092509	0.917745	1911	0.96975	0.96979	1	18344
RIOK2	0.030254	0.092509	0.917745	1912	0.96975	0.96979	1	18340
TMEM132A	0.030296	0.092621	0.917745	1913	0.23981	0.3577	1	6764
FJX1	0.030312	0.092669	0.917745	1914	0.93022	0.93035	1	17519
PCDHAC2	0.030336	0.09274	0.917745	1915	0.80753	0.80744	1	15257
GPR63	0.03034	0.09275	0.917745	1916	0.8417	0.84156	1	15894
BHLHE22	0.030366	0.092829	0.917745	1917	0.7466	0.74626	1	14118
ADAM10	0.030388	0.092886	0.917745	1918	0.75113	0.75088	1	14184
ALPPL2	0.030402	0.092921	0.917745	1919	0.82614	0.82609	1	15595
LAMA4	0.030407	0.09293	0.917745	1920	0.75047	0.7502	1	14174
PROKR2	0.03041	0.092943	0.917745	1921	0.42482	0.48152	1	9076
SAMD5	0.030421	0.092979	0.917745	1922	0.96958	0.96963	1	18335
OLFM1	0.030427	0.092996	0.917745	1923	0.2478	0.36758	1	6950
SMARCA5	0.030452	0.093067	0.917745	1924	0.96955	0.9696	1	18334
CRELD1	0.030464	0.093095	0.917745	1925	0.16474	0.26438	1	5032
C14orf37	0.030473	0.093117	0.917745	1926	0.96953	0.96958	1	18333
JUND	0.030498	0.09319	0.917745	1927	0.9695	0.96956	1	18332
SLC25A22	0.030507	0.093221	0.917745	1928	0.95146	0.95152	1	17971
THAP4	0.030513	0.093237	0.917745	1929	0.57331	0.58604	1	11079
PLCB2	0.030513	0.093237	0.917745	1930	0.17527	0.27758	1	5285
ADAM28	0.03054	0.093303	0.917745	1931	0.71053	0.7102	1	13434
C9orf41	0.030544	0.093316	0.917745	1932	0.96946	0.96951	1	18331
C1orf131	0.030553	0.093342	0.917745	1933	0.79087	0.79075	1	14928
MYCBP2	0.030584	0.093428	0.917745	1934	0.96942	0.96947	1	18330
AFAP1	0.030588	0.093435	0.917745	1935	0.3448	0.43338	1	8195
UNC45A	0.030593	0.093451	0.917745	1936	0.71402	0.71366	1	13516
TNFRSF8	0.030593	0.093451	0.917745	1937	0.77073	0.77051	1	14548
LOC728485	0.030593	0.093451	0.917745	1938	0.89141	0.89136	1	16801
TAX1BP1	0.030593	0.093451	0.917745	1939	0.026924	0.067248	0.950726	1346
GBP5	0.030599	0.093471	0.917745	1940	0.58175	0.59283	1	11198
BICD2	0.030601	0.093476	0.917745	1941	0.9694	0.96945	1	18329
CUL1	0.030604	0.093486	0.917745	1942	0.62039	0.62509	1	11828
CLRN3	0.030618	0.093527	0.917745	1943	0.73027	0.72998	1	13821
ABCG2	0.030651	0.093625	0.917745	1944	0.5948	0.60355	1	11410
OPRD1	0.030654	0.093634	0.917745	1945	0.54193	0.56187	1	10627
C4orf48	0.03067	0.093676	0.917745	1946	0.40439	0.46884	1	8829
PFDN2	0.03067	0.093676	0.917745	1947	0.63891	0.64145	1	12150
TADA2B	0.03067	0.093676	0.917745	1948	0.007976	0.023668	0.862914	523
MRTO4	0.03067	0.093676	0.917745	1949	0.93949	0.9396	1	17714
BRAP	0.03067	0.093676	0.917745	1950	0.8961	0.89605	1	16878
TMED1	0.030695	0.093754	0.917793	1951	0.9693	0.96935	1	18326
TSSK3	0.030722	0.093818	0.917793	1952	0.87121	0.87113	1	16432
COL15A1	0.030798	0.094001	0.917793	1953	0.9692	0.96924	1	18325
ZSCAN26	0.030798	0.094002	0.917793	1954	0.43285	0.48661	1	9178
WDR78	0.030798	0.094002	0.917793	1955	0.73099	0.7307	1	13832
ABCB8	0.030875	0.094214	0.917793	1956	0.17647	0.27906	1	5314
NPPA	0.030878	0.09422	0.917793	1957	0.94781	0.94786	1	17887
MORN5	0.030911	0.094308	0.917793	1958	0.96909	0.96913	1	18324
CNOT8	0.030927	0.094358	0.917793	1959	0.23078	0.34659	1	6552
TCP10	0.030934	0.094377	0.917793	1960	0.78581	0.78569	1	14828
KRT37	0.03094	0.094405	0.917793	1961	0.96906	0.9691	1	18323
THSD4	0.030964	0.094481	0.917793	1962	0.15094	0.24702	1	4715
OAS1	0.030977	0.094512	0.917793	1963	0.75613	0.75593	1	14277
SLC20A1	0.030991	0.094547	0.917793	1964	0.96901	0.96905	1	18321
CIART	0.031018	0.094634	0.917793	1965	0.96898	0.96902	1	18319
TBC1D30	0.031026	0.094661	0.917793	1966	0.74526	0.7449	1	14095
SIX3	0.03103	0.094672	0.917793	1967	0.56939	0.58291	1	11012
ITGAE	0.031096	0.094841	0.917793	1968	0.9689	0.96895	1	18317
TSGA13	0.031107	0.094872	0.917793	1969	0.96889	0.96895	1	18316
CNOT11	0.031111	0.094882	0.917793	1970	0.96683	0.96687	1	18274
EXOC5	0.031122	0.094912	0.917793	1971	0.65321	0.65441	1	12385
HDC	0.031123	0.094914	0.917793	1972	0.96888	0.96894	1	18315
TRIM10	0.031131	0.094934	0.917793	1973	0.72874	0.72845	1	13787
SMPX	0.031131	0.094934	0.917793	1974	0.2289	0.34428	1	6501
FNTB	0.031131	0.094934	0.917793	1975	0.8483	0.84815	1	16017
PQBP1	0.031131	0.094934	0.917793	1976	0.32578	0.42255	1	8002
BMPR1A	0.031218	0.095167	0.917793	1977	0.96878	0.96885	1	18313
LMX1B	0.031234	0.095208	0.917793	1978	0.53513	0.55674	1	10527
ARID1A	0.031234	0.095208	0.917793	1979	0.24381	0.36261	1	6856
PLEKHG3	0.03124	0.095226	0.917793	1980	0.96876	0.96882	1	18312
NUDT13	0.031259	0.095281	0.917793	1981	0.96874	0.96881	1	18311
AMOTL2	0.031279	0.095337	0.917793	1982	0.96872	0.96879	1	18310
UTP14A	0.031336	0.09548	0.917793	1983	0.39372	0.46226	1	8712
LYPLA2	0.031336	0.09548	0.917793	1984	0.17383	0.27581	1	5247
BEND7	0.031336	0.09548	0.917793	1985	0.45157	0.49865	1	9402
C1orf162	0.031344	0.095501	0.917793	1986	0.85916	0.85897	1	16223
GOLGB1	0.031358	0.095534	0.917793	1987	0.49853	0.53048	1	10008
SPON2	0.031361	0.095545	0.917793	1988	0.96864	0.9687	1	18308
KRT6B	0.031413	0.095682	0.917793	1989	0.76845	0.76823	1	14506
JDP2	0.031439	0.095749	0.917793	1990	0.72467	0.72446	1	13714
OSER1	0.03147	0.095827	0.917793	1991	0.96853	0.9686	1	18307
LOC391003	0.031498	0.095903	0.917793	1992	0.9685	0.96857	1	18306
SYT10	0.031537	0.096013	0.917793	1993	0.96846	0.96854	1	18305
ST5	0.031567	0.096088	0.917793	1994	0.085379	0.16421	0.989014	3161
KLHL17	0.031572	0.096102	0.917793	1995	0.90751	0.9075	1	17085
HCN1	0.031606	0.09619	0.917793	1996	0.96839	0.96847	1	18304
SYVN1	0.031639	0.096273	0.917793	1997	0.95397	0.954	1	18014
SLC29A1	0.031649	0.096293	0.917793	1998	0.96835	0.96841	1	18302
[truncated: 17,116 more rows]

## Sheet: brunello
Target Gene ID	Target Gene Symbol	Target Transcript	Genomic Sequence
1	A1BG	NM_130786.3	NC_000019.10
1	A1BG	NM_130786.3	NC_000019.10
1	A1BG	NM_130786.3	NC_000019.10
1	A1BG	NM_130786.3	NC_000019.10
2	A2M	NM_000014.4	NC_000012.12
2	A2M	NM_000014.4	NC_000012.12
2	A2M	NM_000014.4	NC_000012.12
2	A2M	NM_000014.4	NC_000012.12
9	NAT1	NM_000662.7	NC_000008.11
9	NAT1	NM_000662.7	NC_000008.11
9	NAT1	NM_000662.7	NC_000008.11
9	NAT1	NM_000662.7	NC_000008.11
10	NAT2	NM_000015.2	NC_000008.11
10	NAT2	NM_000015.2	NC_000008.11
10	NAT2	NM_000015.2	NC_000008.11
10	NAT2	NM_000015.2	NC_000008.11
12	SERPINA3	NM_001085.4	NC_000014.9
12	SERPINA3	NM_001085.4	NC_000014.9
12	SERPINA3	NM_001085.4	NC_000014.9
12	SERPINA3	NM_001085.4	NC_000014.9
13	AADAC	NM_001086.2	NC_000003.12
13	AADAC	NM_001086.2	NC_000003.12
13	AADAC	NM_001086.2	NC_000003.12
13	AADAC	NM_001086.2	NC_000003.12
14	AAMP	NM_001087.4	NC_000002.12
14	AAMP	NM_001087.4	NC_000002.12
14	AAMP	NM_001087.4	NC_000002.12
14	AAMP	NM_001087.4	NC_000002.12
15	AANAT	NM_001088.2	NC_000017.11
15	AANAT	NM_001088.2	NC_000017.11
15	AANAT	NM_001088.2	NC_000017.11
15	AANAT	NM_001088.2	NC_000017.11
16	AARS	NM_001605.2	NC_000016.10
16	AARS	NM_001605.2	NC_000016.10
16	AARS	NM_001605.2	NC_000016.10
16	AARS	NM_001605.2	NC_000016.10
18	ABAT	NM_020686.5	NC_000016.10
18	ABAT	NM_020686.5	NC_000016.10
18	ABAT	NM_020686.5	NC_000016.10
18	ABAT	NM_020686.5	NC_000016.10
19	ABCA1	NM_005502.3	NC_000009.12
19	ABCA1	NM_005502.3	NC_000009.12
19	ABCA1	NM_005502.3	NC_000009.12
19	ABCA1	NM_005502.3	NC_000009.12
20	ABCA2	NM_001606.4	NC_000009.12
20	ABCA2	NM_001606.4	NC_000009.12
20	ABCA2	NM_001606.4	NC_000009.12
20	ABCA2	NM_001606.4	NC_000009.12
21	ABCA3	NM_001089.2	NC_000016.10
21	ABCA3	NM_001089.2	NC_000016.10
21	ABCA3	NM_001089.2	NC_000016.10
21	ABCA3	NM_001089.2	NC_000016.10
22	ABCB7	NM_004299.4	NC_000023.11
22	ABCB7	NM_004299.4	NC_000023.11
22	ABCB7	NM_004299.4	NC_000023.11
22	ABCB7	NM_004299.4	NC_000023.11
23	ABCF1	NM_001025091.1	NC_000006.12
23	ABCF1	NM_001025091.1	NC_000006.12
23	ABCF1	NM_001025091.1	NC_000006.12
23	ABCF1	NM_001025091.1	NC_000006.12
24	ABCA4	NM_000350.2	NC_000001.11
24	ABCA4	NM_000350.2	NC_000001.11
24	ABCA4	NM_000350.2	NC_000001.11
24	ABCA4	NM_000350.2	NC_000001.11
25	ABL1	NM_007313.2	NC_000009.12
25	ABL1	NM_007313.2	NC_000009.12
25	ABL1	NM_007313.2	NC_000009.12
25	ABL1	NM_007313.2	NC_000009.12
26	AOC1	NM_001091.3	NC_000007.14
26	AOC1	NM_001091.3	NC_000007.14
26	AOC1	NM_001091.3	NC_000007.14
26	AOC1	NM_001091.3	NC_000007.14
27	ABL2	NM_007314.3	NC_000001.11
27	ABL2	NM_007314.3	NC_000001.11
27	ABL2	NM_007314.3	NC_000001.11
27	ABL2	NM_007314.3	NC_000001.11
28	ABO	NM_020469.2	NC_000009.12
28	ABO	NM_020469.2	NC_000009.12
28	ABO	NM_020469.2	NC_000009.12
28	ABO	NM_020469.2	NC_000009.12
29	ABR	NM_021962.4	NC_000017.11
29	ABR	NM_021962.4	NC_000017.11
29	ABR	NM_021962.4	NC_000017.11
29	ABR	NM_021962.4	NC_000017.11
30	ACAA1	NM_001607.3	NC_000003.12
30	ACAA1	NM_001607.3	NC_000003.12
30	ACAA1	NM_001607.3	NC_000003.12
30	ACAA1	NM_001607.3	NC_000003.12
31	ACACA	NM_198834.2	NC_000017.11
31	ACACA	NM_198834.2	NC_000017.11
31	ACACA	NM_198834.2	NC_000017.11
31	ACACA	NM_198834.2	NC_000017.11
32	ACACB	NM_001093.3	NC_000012.12
32	ACACB	NM_001093.3	NC_000012.12
32	ACACB	NM_001093.3	NC_000012.12
32	ACACB	NM_001093.3	NC_000012.12
33	ACADL	NM_001608.3	NC_000002.12
33	ACADL	NM_001608.3	NC_000002.12
33	ACADL	NM_001608.3	NC_000002.12
33	ACADL	NM_001608.3	NC_000002.12
34	ACADM	NM_000016.5	NC_000001.11
34	ACADM	NM_000016.5	NC_000001.11
34	ACADM	NM_000016.5	NC_000001.11
34	ACADM	NM_000016.5	NC_000001.11
35	ACADS	NM_000017.3	NC_000012.12
35	ACADS	NM_000017.3	NC_000012.12
35	ACADS	NM_000017.3	NC_000012.12
35	ACADS	NM_000017.3	NC_000012.12
36	ACADSB	NM_001609.3	NC_000010.11
36	ACADSB	NM_001609.3	NC_000010.11
36	ACADSB	NM_001609.3	NC_000010.11
36	ACADSB	NM_001609.3	NC_000010.11
37	ACADVL	NM_000018.3	NC_000017.11
37	ACADVL	NM_000018.3	NC_000017.11
37	ACADVL	NM_000018.3	NC_000017.11
37	ACADVL	NM_000018.3	NC_000017.11
38	ACAT1	NM_000019.3	NC_000011.10
38	ACAT1	NM_000019.3	NC_000011.10
38	ACAT1	NM_000019.3	NC_000011.10
38	ACAT1	NM_000019.3	NC_000011.10
39	ACAT2	NM_005891.2	NC_000006.12
39	ACAT2	NM_005891.2	NC_000006.12
39	ACAT2	NM_005891.2	NC_000006.12
39	ACAT2	NM_005891.2	NC_000006.12
40	ASIC2	NM_001094.4	NC_000017.11
40	ASIC2	NM_001094.4	NC_000017.11
40	ASIC2	NM_001094.4	NC_000017.11
40	ASIC2	NM_001094.4	NC_000017.11
41	ASIC1	NM_001095.3	NC_000012.12
41	ASIC1	NM_001095.3	NC_000012.12
41	ASIC1	NM_001095.3	NC_000012.12
41	ASIC1	NM_001095.3	NC_000012.12
43	ACHE	NM_000665.4	NC_000007.14
43	ACHE	NM_000665.4	NC_000007.14
43	ACHE	NM_000665.4	NC_000007.14
43	ACHE	NM_000665.4	NC_000007.14
47	ACLY	NM_001096.2	NC_000017.11
47	ACLY	NM_001096.2	NC_000017.11
47	ACLY	NM_001096.2	NC_000017.11
47	ACLY	NM_001096.2	NC_000017.11
48	ACO1	NM_002197.2	NC_000009.12
48	ACO1	NM_002197.2	NC_000009.12
48	ACO1	NM_002197.2	NC_000009.12
48	ACO1	NM_002197.2	NC_000009.12
49	ACR	NM_001097.2	NC_000022.11
49	ACR	NM_001097.2	NC_000022.11
49	ACR	NM_001097.2	NC_000022.11
49	ACR	NM_001097.2	NC_000022.11
50	ACO2	NM_001098.2	NC_000022.11
50	ACO2	NM_001098.2	NC_000022.11
50	ACO2	NM_001098.2	NC_000022.11
50	ACO2	NM_001098.2	NC_000022.11
51	ACOX1	NM_007292.5	NC_000017.11
51	ACOX1	NM_007292.5	NC_000017.11
51	ACOX1	NM_007292.5	NC_000017.11
51	ACOX1	NM_007292.5	NC_000017.11
52	ACP1	NM_004300.3	NC_000002.12
52	ACP1	NM_004300.3	NC_000002.12
52	ACP1	NM_004300.3	NC_000002.12
52	ACP1	NM_004300.3	NC_000002.12
53	ACP2	NM_001610.3	NC_000011.10
53	ACP2	NM_001610.3	NC_000011.10
53	ACP2	NM_001610.3	NC_000011.10
53	ACP2	NM_001610.3	NC_000011.10
54	ACP5	NM_001111035.1	NC_000019.10
54	ACP5	NM_001111035.1	NC_000019.10
54	ACP5	NM_001111035.1	NC_000019.10
54	ACP5	NM_001111035.1	NC_000019.10
55	ACPP	NM_001099.4	NC_000003.12
55	ACPP	NM_001099.4	NC_000003.12
55	ACPP	NM_001099.4	NC_000003.12
55	ACPP	NM_001099.4	NC_000003.12
56	ACRV1	NM_001612.5	NC_000011.10
56	ACRV1	NM_001612.5	NC_000011.10
56	ACRV1	NM_001612.5	NC_000011.10
56	ACRV1	NM_001612.5	NC_000011.10
58	ACTA1	NM_001100.3	NC_000001.11
58	ACTA1	NM_001100.3	NC_000001.11
58	ACTA1	NM_001100.3	NC_000001.11
58	ACTA1	NM_001100.3	NC_000001.11
59	ACTA2	NM_001613.2	NC_000010.11
59	ACTA2	NM_001613.2	NC_000010.11
59	ACTA2	NM_001613.2	NC_000010.11
59	ACTA2	NM_001613.2	NC_000010.11
60	ACTB	NM_001101.3	NC_000007.14
60	ACTB	NM_001101.3	NC_000007.14
60	ACTB	NM_001101.3	NC_000007.14
60	ACTB	NM_001101.3	NC_000007.14
70	ACTC1	NM_005159.4	NC_000015.10
70	ACTC1	NM_005159.4	NC_000015.10
70	ACTC1	NM_005159.4	NC_000015.10
70	ACTC1	NM_005159.4	NC_000015.10
71	ACTG1	NM_001614.3	NC_000017.11
71	ACTG1	NM_001614.3	NC_000017.11
71	ACTG1	NM_001614.3	NC_000017.11
71	ACTG1	NM_001614.3	NC_000017.11
72	ACTG2	NM_001615.3	NC_000002.12
72	ACTG2	NM_001615.3	NC_000002.12
72	ACTG2	NM_001615.3	NC_000002.12
72	ACTG2	NM_001615.3	NC_000002.12
81	ACTN4	NM_004924.4	NC_000019.10
81	ACTN4	NM_004924.4	NC_000019.10
81	ACTN4	NM_004924.4	NC_000019.10
81	ACTN4	NM_004924.4	NC_000019.10
86	ACTL6A	NM_004301.4	NC_000003.12
86	ACTL6A	NM_004301.4	NC_000003.12
86	ACTL6A	NM_004301.4	NC_000003.12
86	ACTL6A	NM_004301.4	NC_000003.12
87	ACTN1	NM_001102.3	NC_000014.9
87	ACTN1	NM_001102.3	NC_000014.9
87	ACTN1	NM_001102.3	NC_000014.9
87	ACTN1	NM_001102.3	NC_000014.9
88	ACTN2	NM_001103.3	NC_000001.11
88	ACTN2	NM_001103.3	NC_000001.11
88	ACTN2	NM_001103.3	NC_000001.11
88	ACTN2	NM_001103.3	NC_000001.11
89	ACTN3	NM_001104.3	NC_000011.10
89	ACTN3	NM_001104.3	NC_000011.10
89	ACTN3	NM_001104.3	NC_000011.10
89	ACTN3	NM_001104.3	NC_000011.10
90	ACVR1	NM_001105.4	NC_000002.12
90	ACVR1	NM_001105.4	NC_000002.12
90	ACVR1	NM_001105.4	NC_000002.12
90	ACVR1	NM_001105.4	NC_000002.12
91	ACVR1B	NM_004302.4	NC_000012.12
91	ACVR1B	NM_004302.4	NC_000012.12
91	ACVR1B	NM_004302.4	NC_000012.12
91	ACVR1B	NM_004302.4	NC_000012.12
92	ACVR2A	NM_001278579.1	NC_000002.12
92	ACVR2A	NM_001278579.1	NC_000002.12
92	ACVR2A	NM_001278579.1	NC_000002.12
92	ACVR2A	NM_001278579.1	NC_000002.12
93	ACVR2B	NM_001106.3	NC_000003.12
93	ACVR2B	NM_001106.3	NC_000003.12
93	ACVR2B	NM_001106.3	NC_000003.12
93	ACVR2B	NM_001106.3	NC_000003.12
94	ACVRL1	NM_000020.2	NC_000012.12
94	ACVRL1	NM_000020.2	NC_000012.12
94	ACVRL1	NM_000020.2	NC_000012.12
94	ACVRL1	NM_000020.2	NC_000012.12
95	ACY1	NM_000666.2	NC_000003.12
95	ACY1	NM_000666.2	NC_000003.12
95	ACY1	NM_000666.2	NC_000003.12
95	ACY1	NM_000666.2	NC_000003.12
97	ACYP1	NM_001107.4	NC_000014.9
97	ACYP1	NM_001107.4	NC_000014.9
97	ACYP1	NM_001107.4	NC_000014.9
97	ACYP1	NM_001107.4	NC_000014.9
98	ACYP2	NM_138448.3	NC_000002.12
98	ACYP2	NM_138448.3	NC_000002.12
98	ACYP2	NM_138448.3	NC_000002.12
98	ACYP2	NM_138448.3	NC_000002.12
100	ADA	NM_000022.2	NC_000020.11
100	ADA	NM_000022.2	NC_000020.11
100	ADA	NM_000022.2	NC_000020.11
100	ADA	NM_000022.2	NC_000020.11
101	ADAM8	NM_001109.4	NC_000010.11
101	ADAM8	NM_001109.4	NC_000010.11
101	ADAM8	NM_001109.4	NC_000010.11
101	ADAM8	NM_001109.4	NC_000010.11
102	ADAM10	NM_001110.3	NC_000015.10
102	ADAM10	NM_001110.3	NC_000015.10
102	ADAM10	NM_001110.3	NC_000015.10
102	ADAM10	NM_001110.3	NC_000015.10
103	ADAR	NM_001111.4	NC_000001.11
103	ADAR	NM_001111.4	NC_000001.11
103	ADAR	NM_001111.4	NC_000001.11
103	ADAR	NM_001111.4	NC_000001.11
104	ADARB1	NM_001112.3	NC_000021.9
104	ADARB1	NM_001112.3	NC_000021.9
104	ADARB1	NM_001112.3	NC_000021.9
104	ADARB1	NM_001112.3	NC_000021.9
105	ADARB2	NM_018702.3	NC_000010.11
105	ADARB2	NM_018702.3	NC_000010.11
105	ADARB2	NM_018702.3	NC_000010.11
105	ADARB2	NM_018702.3	NC_000010.11
107	ADCY1	NM_021116.2	NC_000007.14
107	ADCY1	NM_021116.2	NC_000007.14
107	ADCY1	NM_021116.2	NC_000007.14
107	ADCY1	NM_021116.2	NC_000007.14
108	ADCY2	NM_020546.2	NC_000005.10
108	ADCY2	NM_020546.2	NC_000005.10
108	ADCY2	NM_020546.2	NC_000005.10
108	ADCY2	NM_020546.2	NC_000005.10
109	ADCY3	NM_004036.3	NC_000002.12
109	ADCY3	NM_004036.3	NC_000002.12
109	ADCY3	NM_004036.3	NC_000002.12
109	ADCY3	NM_004036.3	NC_000002.12
111	ADCY5	NM_183357.2	NC_000003.12
111	ADCY5	NM_183357.2	NC_000003.12
111	ADCY5	NM_183357.2	NC_000003.12
111	ADCY5	NM_183357.2	NC_000003.12
112	ADCY6	NM_015270.3	NC_000012.12
112	ADCY6	NM_015270.3	NC_000012.12
112	ADCY6	NM_015270.3	NC_000012.12
112	ADCY6	NM_015270.3	NC_000012.12
113	ADCY7	NM_001114.4	NC_000016.10
113	ADCY7	NM_001114.4	NC_000016.10
113	ADCY7	NM_001114.4	NC_000016.10
113	ADCY7	NM_001114.4	NC_000016.10
114	ADCY8	NM_001115.2	NC_000008.11
114	ADCY8	NM_001115.2	NC_000008.11
114	ADCY8	NM_001115.2	NC_000008.11
114	ADCY8	NM_001115.2	NC_000008.11
115	ADCY9	NM_001116.3	NC_000016.10
115	ADCY9	NM_001116.3	NC_000016.10
115	ADCY9	NM_001116.3	NC_000016.10
115	ADCY9	NM_001116.3	NC_000016.10
116	ADCYAP1	NM_001099733.1	NC_000018.10
116	ADCYAP1	NM_001099733.1	NC_000018.10
116	ADCYAP1	NM_001099733.1	NC_000018.10
116	ADCYAP1	NM_001099733.1	NC_000018.10
117	ADCYAP1R1	NM_001118.4	NC_000007.14
117	ADCYAP1R1	NM_001118.4	NC_000007.14
117	ADCYAP1R1	NM_001118.4	NC_000007.14
117	ADCYAP1R1	NM_001118.4	NC_000007.14
118	ADD1	NM_014189.3	NC_000004.12
118	ADD1	NM_014189.3	NC_000004.12
118	ADD1	NM_014189.3	NC_000004.12
118	ADD1	NM_014189.3	NC_000004.12
119	ADD2	NM_001617.3	NC_000002.12
119	ADD2	NM_001617.3	NC_000002.12
119	ADD2	NM_001617.3	NC_000002.12
119	ADD2	NM_001617.3	NC_000002.12
120	ADD3	NM_016824.3	NC_000010.11
120	ADD3	NM_016824.3	NC_000010.11
120	ADD3	NM_016824.3	NC_000010.11
120	ADD3	NM_016824.3	NC_000010.11
123	PLIN2	NM_001122.3	NC_000009.12
123	PLIN2	NM_001122.3	NC_000009.12
123	PLIN2	NM_001122.3	NC_000009.12
123	PLIN2	NM_001122.3	NC_000009.12
124	ADH1A	NM_000667.3	NC_000004.12
124	ADH1A	NM_000667.3	NC_000004.12
124	ADH1A	NM_000667.3	NC_000004.12
124	ADH1A	NM_000667.3	NC_000004.12
125	ADH1B	NM_000668.5	NC_000004.12
125	ADH1B	NM_000668.5	NC_000004.12
125	ADH1B	NM_000668.5	NC_000004.12
125	ADH1B	NM_000668.5	NC_000004.12
126	ADH1C	NM_000669.4	NC_000004.12
126	ADH1C	NM_000669.4	NC_000004.12
126	ADH1C	NM_000669.4	NC_000004.12
126	ADH1C	NM_000669.4	NC_000004.12
127	ADH4	NM_000670.3	NC_000004.12
127	ADH4	NM_000670.3	NC_000004.12
127	ADH4	NM_000670.3	NC_000004.12
127	ADH4	NM_000670.3	NC_000004.12
128	ADH5	NM_000671.4	NC_000004.12
128	ADH5	NM_000671.4	NC_000004.12
128	ADH5	NM_000671.4	NC_000004.12
128	ADH5	NM_000671.4	NC_000004.12
130	ADH6	NM_000672.3	NC_000004.12
130	ADH6	NM_000672.3	NC_000004.12
130	ADH6	NM_000672.3	NC_000004.12
130	ADH6	NM_000672.3	NC_000004.12
131	ADH7	NM_000673.4	NC_000004.12
131	ADH7	NM_000673.4	NC_000004.12
131	ADH7	NM_000673.4	NC_000004.12
131	ADH7	NM_000673.4	NC_000004.12
132	ADK	NM_006721.3	NC_000010.11
132	ADK	NM_006721.3	NC_000010.11
132	ADK	NM_006721.3	NC_000010.11
132	ADK	NM_006721.3	NC_000010.11
133	ADM	NM_001124.2	NC_000011.10
133	ADM	NM_001124.2	NC_000011.10
133	ADM	NM_001124.2	NC_000011.10
133	ADM	NM_001124.2	NC_000011.10
134	ADORA1	NM_001048230.1	NC_000001.11
134	ADORA1	NM_001048230.1	NC_000001.11
134	ADORA1	NM_001048230.1	NC_000001.11
134	ADORA1	NM_001048230.1	NC_000001.11
135	ADORA2A	NM_000675.5	NC_000022.11
135	ADORA2A	NM_000675.5	NC_000022.11
135	ADORA2A	NM_000675.5	NC_000022.11
135	ADORA2A	NM_000675.5	NC_000022.11
136	ADORA2B	NM_000676.2	NC_000017.11
136	ADORA2B	NM_000676.2	NC_000017.11
136	ADORA2B	NM_000676.2	NC_000017.11
136	ADORA2B	NM_000676.2	NC_000017.11
140	ADORA3	NM_000677.3	NC_000001.11
140	ADORA3	NM_000677.3	NC_000001.11
140	ADORA3	NM_000677.3	NC_000001.11
140	ADORA3	NM_000677.3	NC_000001.11
141	ADPRH	NM_001125.3	NC_000003.12
141	ADPRH	NM_001125.3	NC_000003.12
141	ADPRH	NM_001125.3	NC_000003.12
141	ADPRH	NM_001125.3	NC_000003.12
142	PARP1	NM_001618.3	NC_000001.11
142	PARP1	NM_001618.3	NC_000001.11
142	PARP1	NM_001618.3	NC_000001.11
142	PARP1	NM_001618.3	NC_000001.11
143	PARP4	NM_006437.3	NC_000013.11
143	PARP4	NM_006437.3	NC_000013.11
143	PARP4	NM_006437.3	NC_000013.11
143	PARP4	NM_006437.3	NC_000013.11
146	ADRA1D	NM_000678.3	NC_000020.11
146	ADRA1D	NM_000678.3	NC_000020.11
146	ADRA1D	NM_000678.3	NC_000020.11
146	ADRA1D	NM_000678.3	NC_000020.11
147	ADRA1B	NM_000679.3	NC_000005.10
147	ADRA1B	NM_000679.3	NC_000005.10
147	ADRA1B	NM_000679.3	NC_000005.10
147	ADRA1B	NM_000679.3	NC_000005.10
148	ADRA1A	NM_000680.2	NC_000008.11
148	ADRA1A	NM_000680.2	NC_000008.11
148	ADRA1A	NM_000680.2	NC_000008.11
148	ADRA1A	NM_000680.2	NC_000008.11
150	ADRA2A	NM_000681.3	NC_000010.11
150	ADRA2A	NM_000681.3	NC_000010.11
150	ADRA2A	NM_000681.3	NC_000010.11
150	ADRA2A	NM_000681.3	NC_000010.11
151	ADRA2B	NM_000682.6	NC_000002.12
151	ADRA2B	NM_000682.6	NC_000002.12
151	ADRA2B	NM_000682.6	NC_000002.12
151	ADRA2B	NM_000682.6	NC_000002.12
152	ADRA2C	NM_000683.3	NC_000004.12
152	ADRA2C	NM_000683.3	NC_000004.12
152	ADRA2C	NM_000683.3	NC_000004.12
152	ADRA2C	NM_000683.3	NC_000004.12
153	ADRB1	NM_000684.2	NC_000010.11
153	ADRB1	NM_000684.2	NC_000010.11
153	ADRB1	NM_000684.2	NC_000010.11
153	ADRB1	NM_000684.2	NC_000010.11
154	ADRB2	NM_000024.5	NC_000005.10
154	ADRB2	NM_000024.5	NC_000005.10
154	ADRB2	NM_000024.5	NC_000005.10
154	ADRB2	NM_000024.5	NC_000005.10
155	ADRB3	NM_000025.2	NC_000008.11
155	ADRB3	NM_000025.2	NC_000008.11
155	ADRB3	NM_000025.2	NC_000008.11
155	ADRB3	NM_000025.2	NC_000008.11
156	ADRBK1	NM_001619.3	NC_000011.10
156	ADRBK1	NM_001619.3	NC_000011.10
156	ADRBK1	NM_001619.3	NC_000011.10
156	ADRBK1	NM_001619.3	NC_000011.10
157	ADRBK2	NM_005160.3	NC_000022.11
157	ADRBK2	NM_005160.3	NC_000022.11
157	ADRBK2	NM_005160.3	NC_000022.11
157	ADRBK2	NM_005160.3	NC_000022.11
158	ADSL	NM_000026.2	NC_000022.11
158	ADSL	NM_000026.2	NC_000022.11
158	ADSL	NM_000026.2	NC_000022.11
158	ADSL	NM_000026.2	NC_000022.11
159	ADSS	NM_001126.3	NC_000001.11
159	ADSS	NM_001126.3	NC_000001.11
159	ADSS	NM_001126.3	NC_000001.11
159	ADSS	NM_001126.3	NC_000001.11
160	AP2A1	NM_014203.2	NC_000019.10
160	AP2A1	NM_014203.2	NC_000019.10
160	AP2A1	NM_014203.2	NC_000019.10
160	AP2A1	NM_014203.2	NC_000019.10
161	AP2A2	NM_012305.3	NC_000011.10
161	AP2A2	NM_012305.3	NC_000011.10
161	AP2A2	NM_012305.3	NC_000011.10
161	AP2A2	NM_012305.3	NC_000011.10
162	AP1B1	NM_145730.2	NC_000022.11
162	AP1B1	NM_145730.2	NC_000022.11
162	AP1B1	NM_145730.2	NC_000022.11
162	AP1B1	NM_145730.2	NC_000022.11
163	AP2B1	NM_001030006.1	NC_000017.11
163	AP2B1	NM_001030006.1	NC_000017.11
163	AP2B1	NM_001030006.1	NC_000017.11
163	AP2B1	NM_001030006.1	NC_000017.11
164	AP1G1	NM_001128.5	NC_000016.10
164	AP1G1	NM_001128.5	NC_000016.10
164	AP1G1	NM_001128.5	NC_000016.10
164	AP1G1	NM_001128.5	NC_000016.10
165	AEBP1	NM_001129.4	NC_000007.14
165	AEBP1	NM_001129.4	NC_000007.14
165	AEBP1	NM_001129.4	NC_000007.14
165	AEBP1	NM_001129.4	NC_000007.14
166	AES	NM_001130.5	NC_000019.10
166	AES	NM_001130.5	NC_000019.10
166	AES	NM_001130.5	NC_000019.10
166	AES	NM_001130.5	NC_000019.10
167	CRISP1	NM_001131.2	NC_000006.12
167	CRISP1	NM_001131.2	NC_000006.12
167	CRISP1	NM_001131.2	NC_000006.12
167	CRISP1	NM_001131.2	NC_000006.12
173	AFM	NM_001133.2	NC_000004.12
173	AFM	NM_001133.2	NC_000004.12
173	AFM	NM_001133.2	NC_000004.12
173	AFM	NM_001133.2	NC_000004.12
174	AFP	NM_001134.2	NC_000004.12
174	AFP	NM_001134.2	NC_000004.12
174	AFP	NM_001134.2	NC_000004.12
174	AFP	NM_001134.2	NC_000004.12
175	AGA	NM_000027.3	NC_000004.12
175	AGA	NM_000027.3	NC_000004.12
175	AGA	NM_000027.3	NC_000004.12
175	AGA	NM_000027.3	NC_000004.12
176	ACAN	NM_013227.3	NC_000015.10
176	ACAN	NM_013227.3	NC_000015.10
176	ACAN	NM_013227.3	NC_000015.10
176	ACAN	NM_013227.3	NC_000015.10
177	AGER	NM_001136.4	NC_000006.12
177	AGER	NM_001136.4	NC_000006.12
177	AGER	NM_001136.4	NC_000006.12
177	AGER	NM_001136.4	NC_000006.12
178	AGL	NM_000642.2	NC_000001.11
178	AGL	NM_000642.2	NC_000001.11
178	AGL	NM_000642.2	NC_000001.11
178	AGL	NM_000642.2	NC_000001.11
181	AGRP	NM_001138.1	NC_000016.10
181	AGRP	NM_001138.1	NC_000016.10
181	AGRP	NM_001138.1	NC_000016.10
181	AGRP	NM_001138.1	NC_000016.10
182	JAG1	NM_000214.2	NC_000020.11
182	JAG1	NM_000214.2	NC_000020.11
182	JAG1	NM_000214.2	NC_000020.11
182	JAG1	NM_000214.2	NC_000020.11
183	AGT	NM_000029.3	NC_000001.11
183	AGT	NM_000029.3	NC_000001.11
183	AGT	NM_000029.3	NC_000001.11
183	AGT	NM_000029.3	NC_000001.11
185	AGTR1	NM_009585.3	NC_000003.12
185	AGTR1	NM_009585.3	NC_000003.12
185	AGTR1	NM_009585.3	NC_000003.12
185	AGTR1	NM_009585.3	NC_000003.12
186	AGTR2	NM_000686.4	NC_000023.11
186	AGTR2	NM_000686.4	NC_000023.11
186	AGTR2	NM_000686.4	NC_000023.11
186	AGTR2	NM_000686.4	NC_000023.11
187	APLNR	NM_005161.4	NC_000011.10
187	APLNR	NM_005161.4	NC_000011.10
187	APLNR	NM_005161.4	NC_000011.10
187	APLNR	NM_005161.4	NC_000011.10
189	AGXT	NM_000030.2	NC_000002.12
189	AGXT	NM_000030.2	NC_000002.12
189	AGXT	NM_000030.2	NC_000002.12
189	AGXT	NM_000030.2	NC_000002.12
190	NR0B1	NM_000475.4	NC_000023.11
190	NR0B1	NM_000475.4	NC_000023.11
190	NR0B1	NM_000475.4	NC_000023.11
190	NR0B1	NM_000475.4	NC_000023.11
191	AHCY	NM_000687.2	NC_000020.11
191	AHCY	NM_000687.2	NC_000020.11
191	AHCY	NM_000687.2	NC_000020.11
191	AHCY	NM_000687.2	NC_000020.11
196	AHR	NM_001621.4	NC_000007.14
196	AHR	NM_001621.4	NC_000007.14
196	AHR	NM_001621.4	NC_000007.14
196	AHR	NM_001621.4	NC_000007.14
197	AHSG	NM_001622.2	NC_000003.12
197	AHSG	NM_001622.2	NC_000003.12
197	AHSG	NM_001622.2	NC_000003.12
197	AHSG	NM_001622.2	NC_000003.12
199	AIF1	NM_001623.3	NC_000006.12
199	AIF1	NM_001623.3	NC_000006.12
199	AIF1	NM_001623.3	NC_000006.12
199	AIF1	NM_001623.3	NC_000006.12
202	AIM1	NM_001624.3	NC_000006.12
202	AIM1	NM_001624.3	NC_000006.12
202	AIM1	NM_001624.3	NC_000006.12
202	AIM1	NM_001624.3	NC_000006.12
203	AK1	NM_000476.2	NC_000009.12
203	AK1	NM_000476.2	NC_000009.12
203	AK1	NM_000476.2	NC_000009.12
203	AK1	NM_000476.2	NC_000009.12
204	AK2	NM_001625.3	NC_000001.11
204	AK2	NM_001625.3	NC_000001.11
204	AK2	NM_001625.3	NC_000001.11
204	AK2	NM_001625.3	NC_000001.11
205	AK4	NM_013410.3	NC_000001.11
205	AK4	NM_013410.3	NC_000001.11
205	AK4	NM_013410.3	NC_000001.11
205	AK4	NM_013410.3	NC_000001.11
207	AKT1	NM_001014431.1	NC_000014.9
207	AKT1	NM_001014431.1	NC_000014.9
207	AKT1	NM_001014431.1	NC_000014.9
207	AKT1	NM_001014431.1	NC_000014.9
208	AKT2	NM_001626.5	NC_000019.10
208	AKT2	NM_001626.5	NC_000019.10
208	AKT2	NM_001626.5	NC_000019.10
208	AKT2	NM_001626.5	NC_000019.10
210	ALAD	NM_000031.5	NC_000009.12
210	ALAD	NM_000031.5	NC_000009.12
210	ALAD	NM_000031.5	NC_000009.12
210	ALAD	NM_000031.5	NC_000009.12
211	ALAS1	NM_199166.2	NC_000003.12
211	ALAS1	NM_199166.2	NC_000003.12
211	ALAS1	NM_199166.2	NC_000003.12
211	ALAS1	NM_199166.2	NC_000003.12
212	ALAS2	NM_000032.4	NC_000023.11
212	ALAS2	NM_000032.4	NC_000023.11
212	ALAS2	NM_000032.4	NC_000023.11
212	ALAS2	NM_000032.4	NC_000023.11
213	ALB	NM_000477.5	NC_000004.12
213	ALB	NM_000477.5	NC_000004.12
213	ALB	NM_000477.5	NC_000004.12
213	ALB	NM_000477.5	NC_000004.12
214	ALCAM	NM_001243281.1	NC_000003.12
214	ALCAM	NM_001243281.1	NC_000003.12
214	ALCAM	NM_001243281.1	NC_000003.12
214	ALCAM	NM_001243281.1	NC_000003.12
215	ABCD1	NM_000033.3	NC_000023.11
215	ABCD1	NM_000033.3	NC_000023.11
215	ABCD1	NM_000033.3	NC_000023.11
215	ABCD1	NM_000033.3	NC_000023.11
216	ALDH1A1	NM_000689.4	NC_000009.12
216	ALDH1A1	NM_000689.4	NC_000009.12
216	ALDH1A1	NM_000689.4	NC_000009.12
216	ALDH1A1	NM_000689.4	NC_000009.12
217	ALDH2	NM_000690.3	NC_000012.12
217	ALDH2	NM_000690.3	NC_000012.12
217	ALDH2	NM_000690.3	NC_000012.12
217	ALDH2	NM_000690.3	NC_000012.12
218	ALDH3A1	NM_000691.4	NC_000017.11
218	ALDH3A1	NM_000691.4	NC_000017.11
218	ALDH3A1	NM_000691.4	NC_000017.11
218	ALDH3A1	NM_000691.4	NC_000017.11
219	ALDH1B1	NM_000692.4	NC_000009.12
219	ALDH1B1	NM_000692.4	NC_000009.12
219	ALDH1B1	NM_000692.4	NC_000009.12
219	ALDH1B1	NM_000692.4	NC_000009.12
220	ALDH1A3	NM_000693.3	NC_000015.10
220	ALDH1A3	NM_000693.3	NC_000015.10
220	ALDH1A3	NM_000693.3	NC_000015.10
220	ALDH1A3	NM_000693.3	NC_000015.10
221	ALDH3B1	NM_001161473.2	NC_000011.10
221	ALDH3B1	NM_001161473.2	NC_000011.10
221	ALDH3B1	NM_001161473.2	NC_000011.10
221	ALDH3B1	NM_001161473.2	NC_000011.10
222	ALDH3B2	NM_001031615.1	NC_000011.10
222	ALDH3B2	NM_001031615.1	NC_000011.10
222	ALDH3B2	NM_001031615.1	NC_000011.10
222	ALDH3B2	NM_001031615.1	NC_000011.10
223	ALDH9A1	NM_000696.3	NC_000001.11
223	ALDH9A1	NM_000696.3	NC_000001.11
223	ALDH9A1	NM_000696.3	NC_000001.11
223	ALDH9A1	NM_000696.3	NC_000001.11
224	ALDH3A2	NM_000382.2	NC_000017.11
224	ALDH3A2	NM_000382.2	NC_000017.11
224	ALDH3A2	NM_000382.2	NC_000017.11
224	ALDH3A2	NM_000382.2	NC_000017.11
225	ABCD2	NM_005164.3	NC_000012.12
225	ABCD2	NM_005164.3	NC_000012.12
225	ABCD2	NM_005164.3	NC_000012.12
225	ABCD2	NM_005164.3	NC_000012.12
226	ALDOA	NM_000034.3	NC_000016.10
226	ALDOA	NM_000034.3	NC_000016.10
226	ALDOA	NM_000034.3	NC_000016.10
226	ALDOA	NM_000034.3	NC_000016.10
229	ALDOB	NM_000035.3	NC_000009.12
229	ALDOB	NM_000035.3	NC_000009.12
229	ALDOB	NM_000035.3	NC_000009.12
229	ALDOB	NM_000035.3	NC_000009.12
230	ALDOC	NM_005165.2	NC_000017.11
230	ALDOC	NM_005165.2	NC_000017.11
230	ALDOC	NM_005165.2	NC_000017.11
230	ALDOC	NM_005165.2	NC_000017.11
231	AKR1B1	NM_001628.2	NC_000007.14
231	AKR1B1	NM_001628.2	NC_000007.14
231	AKR1B1	NM_001628.2	NC_000007.14
231	AKR1B1	NM_001628.2	NC_000007.14
238	ALK	NM_004304.4	NC_000002.12
238	ALK	NM_004304.4	NC_000002.12
238	ALK	NM_004304.4	NC_000002.12
238	ALK	NM_004304.4	NC_000002.12
239	ALOX12	NM_000697.2	NC_000017.11
239	ALOX12	NM_000697.2	NC_000017.11
239	ALOX12	NM_000697.2	NC_000017.11
239	ALOX12	NM_000697.2	NC_000017.11
240	ALOX5	NM_000698.3	NC_000010.11
240	ALOX5	NM_000698.3	NC_000010.11
240	ALOX5	NM_000698.3	NC_000010.11
240	ALOX5	NM_000698.3	NC_000010.11
241	ALOX5AP	NM_001629.3	NC_000013.11
241	ALOX5AP	NM_001629.3	NC_000013.11
241	ALOX5AP	NM_001629.3	NC_000013.11
241	ALOX5AP	NM_001629.3	NC_000013.11
242	ALOX12B	NM_001139.2	NC_000017.11
242	ALOX12B	NM_001139.2	NC_000017.11
242	ALOX12B	NM_001139.2	NC_000017.11
242	ALOX12B	NM_001139.2	NC_000017.11
246	ALOX15	NM_001140.3	NC_000017.11
246	ALOX15	NM_001140.3	NC_000017.11
246	ALOX15	NM_001140.3	NC_000017.11
246	ALOX15	NM_001140.3	NC_000017.11
247	ALOX15B	NM_001141.2	NC_000017.11
247	ALOX15B	NM_001141.2	NC_000017.11
247	ALOX15B	NM_001141.2	NC_000017.11
247	ALOX15B	NM_001141.2	NC_000017.11
248	ALPI	NM_001631.4	NC_000002.12
248	ALPI	NM_001631.4	NC_000002.12
248	ALPI	NM_001631.4	NC_000002.12
248	ALPI	NM_001631.4	NC_000002.12
249	ALPL	NM_000478.4	NC_000001.11
249	ALPL	NM_000478.4	NC_000001.11
249	ALPL	NM_000478.4	NC_000001.11
249	ALPL	NM_000478.4	NC_000001.11
250	ALPP	NM_001632.4	NC_000002.12
250	ALPP	NM_001632.4	NC_000002.12
250	ALPP	NM_001632.4	NC_000002.12
250	ALPP	NM_001632.4	NC_000002.12
251	ALPPL2	NM_031313.2	NC_000002.12
251	ALPPL2	NM_031313.2	NC_000002.12
251	ALPPL2	NM_031313.2	NC_000002.12
251	ALPPL2	NM_031313.2	NC_000002.12
257	ALX3	NM_006492.2	NC_000001.11
257	ALX3	NM_006492.2	NC_000001.11
257	ALX3	NM_006492.2	NC_000001.11
257	ALX3	NM_006492.2	NC_000001.11
258	AMBN	NM_016519.5	NC_000004.12
258	AMBN	NM_016519.5	NC_000004.12
258	AMBN	NM_016519.5	NC_000004.12
258	AMBN	NM_016519.5	NC_000004.12
259	AMBP	NM_001633.3	NC_000009.12
259	AMBP	NM_001633.3	NC_000009.12
259	AMBP	NM_001633.3	NC_000009.12
259	AMBP	NM_001633.3	NC_000009.12
262	AMD1	NM_001287214.1	NC_000006.12
262	AMD1	NM_001287214.1	NC_000006.12
262	AMD1	NM_001287214.1	NC_000006.12
262	AMD1	NM_001287214.1	NC_000006.12
265	AMELX	NM_001142.2	NC_000023.11
265	AMELX	NM_001142.2	NC_000023.11
265	AMELX	NM_001142.2	NC_000023.11
265	AMELX	NM_001142.2	NC_000023.11
266	AMELY	NM_001143.1	NC_000024.10
266	AMELY	NM_001143.1	NC_000024.10
266	AMELY	NM_001143.1	NC_000024.10
266	AMELY	NM_001143.1	NC_000024.10
267	AMFR	NM_001144.5	NC_000016.10
267	AMFR	NM_001144.5	NC_000016.10
267	AMFR	NM_001144.5	NC_000016.10
267	AMFR	NM_001144.5	NC_000016.10
268	AMH	NM_000479.3	NC_000019.10
268	AMH	NM_000479.3	NC_000019.10
268	AMH	NM_000479.3	NC_000019.10
268	AMH	NM_000479.3	NC_000019.10
269	AMHR2	NM_020547.2	NC_000012.12
269	AMHR2	NM_020547.2	NC_000012.12
269	AMHR2	NM_020547.2	NC_000012.12
269	AMHR2	NM_020547.2	NC_000012.12
270	AMPD1	NM_000036.2	NC_000001.11
270	AMPD1	NM_000036.2	NC_000001.11
270	AMPD1	NM_000036.2	NC_000001.11
270	AMPD1	NM_000036.2	NC_000001.11
271	AMPD2	NM_001257360.1	NC_000001.11
271	AMPD2	NM_001257360.1	NC_000001.11
271	AMPD2	NM_001257360.1	NC_000001.11
271	AMPD2	NM_001257360.1	NC_000001.11
272	AMPD3	NM_001025389.1	NC_000011.10
272	AMPD3	NM_001025389.1	NC_000011.10
272	AMPD3	NM_001025389.1	NC_000011.10
272	AMPD3	NM_001025389.1	NC_000011.10
273	AMPH	NM_001635.3	NC_000007.14
273	AMPH	NM_001635.3	NC_000007.14
273	AMPH	NM_001635.3	NC_000007.14
273	AMPH	NM_001635.3	NC_000007.14
274	BIN1	NM_139343.2	NC_000002.12
274	BIN1	NM_139343.2	NC_000002.12
274	BIN1	NM_139343.2	NC_000002.12
274	BIN1	NM_139343.2	NC_000002.12
275	AMT	NM_000481.3	NC_000003.12
275	AMT	NM_000481.3	NC_000003.12
275	AMT	NM_000481.3	NC_000003.12
275	AMT	NM_000481.3	NC_000003.12
276	AMY1A	NM_001008221.1	NC_000001.11
276	AMY1A	NM_001008221.1	NC_000001.11
276	AMY1A	NM_001008221.1	NC_000001.11
276	AMY1A	NM_001008221.1	NC_000001.11
277	AMY1B	NM_001008218.1	NC_000001.11
277	AMY1B	NM_001008218.1	NC_000001.11
277	AMY1B	NM_001008218.1	NC_000001.11
277	AMY1B	NM_001008218.1	NC_000001.11
278	AMY1C	NM_001008219.1	NC_000001.11
278	AMY1C	NM_001008219.1	NC_000001.11
278	AMY1C	NM_001008219.1	NC_000001.11
278	AMY1C	NM_001008219.1	NC_000001.11
279	AMY2A	NM_000699.3	NC_000001.11
279	AMY2A	NM_000699.3	NC_000001.11
279	AMY2A	NM_000699.3	NC_000001.11
279	AMY2A	NM_000699.3	NC_000001.11
280	AMY2B	NM_020978.4	NC_000001.11
280	AMY2B	NM_020978.4	NC_000001.11
280	AMY2B	NM_020978.4	NC_000001.11
280	AMY2B	NM_020978.4	NC_000001.11
283	ANG	NM_001145.4	NC_000014.9
283	ANG	NM_001145.4	NC_000014.9
283	ANG	NM_001145.4	NC_000014.9
283	ANG	NM_001145.4	NC_000014.9
284	ANGPT1	NM_001146.3	NC_000008.11
284	ANGPT1	NM_001146.3	NC_000008.11
284	ANGPT1	NM_001146.3	NC_000008.11
284	ANGPT1	NM_001146.3	NC_000008.11
285	ANGPT2	NM_001147.2	NC_000008.11
285	ANGPT2	NM_001147.2	NC_000008.11
285	ANGPT2	NM_001147.2	NC_000008.11
285	ANGPT2	NM_001147.2	NC_000008.11
286	ANK1	NM_001142446.1	NC_000008.11
286	ANK1	NM_001142446.1	NC_000008.11
286	ANK1	NM_001142446.1	NC_000008.11
286	ANK1	NM_001142446.1	NC_000008.11
287	ANK2	NM_001127493.1	NC_000004.12
287	ANK2	NM_001127493.1	NC_000004.12
287	ANK2	NM_001127493.1	NC_000004.12
287	ANK2	NM_001127493.1	NC_000004.12
288	ANK3	NM_020987.3	NC_000010.11
288	ANK3	NM_020987.3	NC_000010.11
288	ANK3	NM_020987.3	NC_000010.11
288	ANK3	NM_020987.3	NC_000010.11
290	ANPEP	NM_001150.2	NC_000015.10
290	ANPEP	NM_001150.2	NC_000015.10
290	ANPEP	NM_001150.2	NC_000015.10
290	ANPEP	NM_001150.2	NC_000015.10
291	SLC25A4	NM_001151.3	NC_000004.12
291	SLC25A4	NM_001151.3	NC_000004.12
291	SLC25A4	NM_001151.3	NC_000004.12
291	SLC25A4	NM_001151.3	NC_000004.12
292	SLC25A5	NM_001152.4	NC_000023.11
292	SLC25A5	NM_001152.4	NC_000023.11
292	SLC25A5	NM_001152.4	NC_000023.11
292	SLC25A5	NM_001152.4	NC_000023.11
293	SLC25A6	NM_001636.3	NC_000023.11
293	SLC25A6	NM_001636.3	NC_000023.11
293	SLC25A6	NM_001636.3	NC_000023.11
293	SLC25A6	NM_001636.3	NC_000023.11
301	ANXA1	NM_000700.2	NC_000009.12
301	ANXA1	NM_000700.2	NC_000009.12
301	ANXA1	NM_000700.2	NC_000009.12
301	ANXA1	NM_000700.2	NC_000009.12
302	ANXA2	NM_001136015.2	NC_000015.10
302	ANXA2	NM_001136015.2	NC_000015.10
302	ANXA2	NM_001136015.2	NC_000015.10
302	ANXA2	NM_001136015.2	NC_000015.10
306	ANXA3	NM_005139.2	NC_000004.12
306	ANXA3	NM_005139.2	NC_000004.12
306	ANXA3	NM_005139.2	NC_000004.12
306	ANXA3	NM_005139.2	NC_000004.12
307	ANXA4	NM_001153.3	NC_000002.12
307	ANXA4	NM_001153.3	NC_000002.12
307	ANXA4	NM_001153.3	NC_000002.12
307	ANXA4	NM_001153.3	NC_000002.12
308	ANXA5	NM_001154.3	NC_000004.12
308	ANXA5	NM_001154.3	NC_000004.12
308	ANXA5	NM_001154.3	NC_000004.12
308	ANXA5	NM_001154.3	NC_000004.12
309	ANXA6	NM_001155.4	NC_000005.10
309	ANXA6	NM_001155.4	NC_000005.10
309	ANXA6	NM_001155.4	NC_000005.10
309	ANXA6	NM_001155.4	NC_000005.10
310	ANXA7	NM_001156.3	NC_000010.11
310	ANXA7	NM_001156.3	NC_000010.11
310	ANXA7	NM_001156.3	NC_000010.11
310	ANXA7	NM_001156.3	NC_000010.11
311	ANXA11	NM_001157.2	NC_000010.11
311	ANXA11	NM_001157.2	NC_000010.11
311	ANXA11	NM_001157.2	NC_000010.11
311	ANXA11	NM_001157.2	NC_000010.11
312	ANXA13	NM_004306.2	NC_000008.11
312	ANXA13	NM_004306.2	NC_000008.11
312	ANXA13	NM_004306.2	NC_000008.11
312	ANXA13	NM_004306.2	NC_000008.11
313	AOAH	NM_001637.3	NC_000007.14
313	AOAH	NM_001637.3	NC_000007.14
313	AOAH	NM_001637.3	NC_000007.14
313	AOAH	NM_001637.3	NC_000007.14
314	AOC2	NM_009590.2	NC_000017.11
314	AOC2	NM_009590.2	NC_000017.11
314	AOC2	NM_009590.2	NC_000017.11
314	AOC2	NM_009590.2	NC_000017.11
316	AOX1	NM_001159.3	NC_000002.12
316	AOX1	NM_001159.3	NC_000002.12
316	AOX1	NM_001159.3	NC_000002.12
316	AOX1	NM_001159.3	NC_000002.12
317	APAF1	NM_181861.1	NC_000012.12
317	APAF1	NM_181861.1	NC_000012.12
317	APAF1	NM_181861.1	NC_000012.12
317	APAF1	NM_181861.1	NC_000012.12
318	NUDT2	NM_147173.2	NC_000009.12
318	NUDT2	NM_147173.2	NC_000009.12
318	NUDT2	NM_147173.2	NC_000009.12
318	NUDT2	NM_147173.2	NC_000009.12
319	APOF	NM_001638.2	NC_000012.12
319	APOF	NM_001638.2	NC_000012.12
319	APOF	NM_001638.2	NC_000012.12
319	APOF	NM_001638.2	NC_000012.12
320	APBA1	NM_001163.3	NC_000009.12
320	APBA1	NM_001163.3	NC_000009.12
320	APBA1	NM_001163.3	NC_000009.12
320	APBA1	NM_001163.3	NC_000009.12
321	APBA2	NM_005503.3	NC_000015.10
321	APBA2	NM_005503.3	NC_000015.10
321	APBA2	NM_005503.3	NC_000015.10
321	APBA2	NM_005503.3	NC_000015.10
322	APBB1	NM_145689.2	NC_000011.10
322	APBB1	NM_145689.2	NC_000011.10
322	APBB1	NM_145689.2	NC_000011.10
322	APBB1	NM_145689.2	NC_000011.10
323	APBB2	NM_173075.4	NC_000004.12
323	APBB2	NM_173075.4	NC_000004.12
323	APBB2	NM_173075.4	NC_000004.12
323	APBB2	NM_173075.4	NC_000004.12
324	APC	NM_001127510.2	NC_000005.10
324	APC	NM_001127510.2	NC_000005.10
324	APC	NM_001127510.2	NC_000005.10
324	APC	NM_001127510.2	NC_000005.10
325	APCS	NM_001639.3	NC_000001.11
325	APCS	NM_001639.3	NC_000001.11
325	APCS	NM_001639.3	NC_000001.11
325	APCS	NM_001639.3	NC_000001.11
326	AIRE	NM_000383.3	NC_000021.9
326	AIRE	NM_000383.3	NC_000021.9
326	AIRE	NM_000383.3	NC_000021.9
326	AIRE	NM_000383.3	NC_000021.9
327	APEH	NM_001640.3	NC_000003.12
327	APEH	NM_001640.3	NC_000003.12
327	APEH	NM_001640.3	NC_000003.12
327	APEH	NM_001640.3	NC_000003.12
328	APEX1	NM_080648.2	NC_000014.9
328	APEX1	NM_080648.2	NC_000014.9
328	APEX1	NM_080648.2	NC_000014.9
328	APEX1	NM_080648.2	NC_000014.9
329	BIRC2	NM_001166.4	NC_000011.10
329	BIRC2	NM_001166.4	NC_000011.10
329	BIRC2	NM_001166.4	NC_000011.10
329	BIRC2	NM_001166.4	NC_000011.10
330	BIRC3	NM_001165.4	NC_000011.10
330	BIRC3	NM_001165.4	NC_000011.10
330	BIRC3	NM_001165.4	NC_000011.10
330	BIRC3	NM_001165.4	NC_000011.10
331	XIAP	NM_001167.3	NC_000023.11
331	XIAP	NM_001167.3	NC_000023.11
331	XIAP	NM_001167.3	NC_000023.11
331	XIAP	NM_001167.3	NC_000023.11
332	BIRC5	NM_001168.2	NC_000017.11
332	BIRC5	NM_001168.2	NC_000017.11
332	BIRC5	NM_001168.2	NC_000017.11
332	BIRC5	NM_001168.2	NC_000017.11
333	APLP1	NM_001024807.1	NC_000019.10
333	APLP1	NM_001024807.1	NC_000019.10
333	APLP1	NM_001024807.1	NC_000019.10
333	APLP1	NM_001024807.1	NC_000019.10
334	APLP2	NM_001642.2	NC_000011.10
334	APLP2	NM_001642.2	NC_000011.10
334	APLP2	NM_001642.2	NC_000011.10
334	APLP2	NM_001642.2	NC_000011.10
335	APOA1	NM_000039.1	NC_000011.10
335	APOA1	NM_000039.1	NC_000011.10
335	APOA1	NM_000039.1	NC_000011.10
335	APOA1	NM_000039.1	NC_000011.10
336	APOA2	NM_001643.1	NC_000001.11
336	APOA2	NM_001643.1	NC_000001.11
336	APOA2	NM_001643.1	NC_000001.11
336	APOA2	NM_001643.1	NC_000001.11
337	APOA4	NM_000482.3	NC_000011.10
337	APOA4	NM_000482.3	NC_000011.10
337	APOA4	NM_000482.3	NC_000011.10
337	APOA4	NM_000482.3	NC_000011.10
338	APOB	NM_000384.2	NC_000002.12
338	APOB	NM_000384.2	NC_000002.12
338	APOB	NM_000384.2	NC_000002.12
338	APOB	NM_000384.2	NC_000002.12
339	APOBEC1	NM_001644.4	NC_000012.12
339	APOBEC1	NM_001644.4	NC_000012.12
339	APOBEC1	NM_001644.4	NC_000012.12
339	APOBEC1	NM_001644.4	NC_000012.12
341	APOC1	NM_001645.3	NC_000019.10
341	APOC1	NM_001645.3	NC_000019.10
341	APOC1	NM_001645.3	NC_000019.10
341	APOC1	NM_001645.3	NC_000019.10
343	AQP8	NM_001169.2	NC_000016.10
343	AQP8	NM_001169.2	NC_000016.10
343	AQP8	NM_001169.2	NC_000016.10
343	AQP8	NM_001169.2	NC_000016.10
344	APOC2	NM_000483.4	NC_000019.10
344	APOC2	NM_000483.4	NC_000019.10
344	APOC2	NM_000483.4	NC_000019.10
344	APOC2	NM_000483.4	NC_000019.10
345	APOC3	NM_000040.1	NC_000011.10
345	APOC3	NM_000040.1	NC_000011.10
345	APOC3	NM_000040.1	NC_000011.10
345	APOC3	NM_000040.1	NC_000011.10
346	APOC4	NM_001646.2	NC_000019.10
346	APOC4	NM_001646.2	NC_000019.10
346	APOC4	NM_001646.2	NC_000019.10
346	APOC4	NM_001646.2	NC_000019.10
347	APOD	NM_001647.3	NC_000003.12
347	APOD	NM_001647.3	NC_000003.12
347	APOD	NM_001647.3	NC_000003.12
347	APOD	NM_001647.3	NC_000003.12
348	APOE	NM_000041.3	NC_000019.10
348	APOE	NM_000041.3	NC_000019.10
348	APOE	NM_000041.3	NC_000019.10
348	APOE	NM_000041.3	NC_000019.10
350	APOH	NM_000042.2	NC_000017.11
350	APOH	NM_000042.2	NC_000017.11
350	APOH	NM_000042.2	NC_000017.11
350	APOH	NM_000042.2	NC_000017.11
351	APP	NM_000484.3	NC_000021.9
351	APP	NM_000484.3	NC_000021.9
351	APP	NM_000484.3	NC_000021.9
351	APP	NM_000484.3	NC_000021.9
353	APRT	NM_000485.2	NC_000016.10
353	APRT	NM_000485.2	NC_000016.10
353	APRT	NM_000485.2	NC_000016.10
353	APRT	NM_000485.2	NC_000016.10
354	KLK3	NM_001648.2	NC_000019.10
354	KLK3	NM_001648.2	NC_000019.10
354	KLK3	NM_001648.2	NC_000019.10
354	KLK3	NM_001648.2	NC_000019.10
355	FAS	NM_000043.4	NC_000010.11
355	FAS	NM_000043.4	NC_000010.11
355	FAS	NM_000043.4	NC_000010.11
355	FAS	NM_000043.4	NC_000010.11
356	FASLG	NM_000639.2	NC_000001.11
356	FASLG	NM_000639.2	NC_000001.11
356	FASLG	NM_000639.2	NC_000001.11
356	FASLG	NM_000639.2	NC_000001.11
357	SHROOM2	NM_001649.2	NC_000023.11
357	SHROOM2	NM_001649.2	NC_000023.11
357	SHROOM2	NM_001649.2	NC_000023.11
357	SHROOM2	NM_001649.2	NC_000023.11
358	AQP1	NM_198098.2	NC_000007.14
358	AQP1	NM_198098.2	NC_000007.14
358	AQP1	NM_198098.2	NC_000007.14
358	AQP1	NM_198098.2	NC_000007.14
359	AQP2	NM_000486.5	NC_000012.12
359	AQP2	NM_000486.5	NC_000012.12
359	AQP2	NM_000486.5	NC_000012.12
359	AQP2	NM_000486.5	NC_000012.12
360	AQP3	NM_004925.4	NC_000009.12
360	AQP3	NM_004925.4	NC_000009.12
360	AQP3	NM_004925.4	NC_000009.12
360	AQP3	NM_004925.4	NC_000009.12
361	AQP4	NM_001650.4	NC_000018.10
361	AQP4	NM_001650.4	NC_000018.10
361	AQP4	NM_001650.4	NC_000018.10
361	AQP4	NM_001650.4	NC_000018.10
362	AQP5	NM_001651.3	NC_000012.12
362	AQP5	NM_001651.3	NC_000012.12
362	AQP5	NM_001651.3	NC_000012.12
362	AQP5	NM_001651.3	NC_000012.12
363	AQP6	NM_001652.3	NC_000012.12
363	AQP6	NM_001652.3	NC_000012.12
363	AQP6	NM_001652.3	NC_000012.12
363	AQP6	NM_001652.3	NC_000012.12
364	AQP7	NM_001170.1	NC_000009.12
364	AQP7	NM_001170.1	NC_000009.12
364	AQP7	NM_001170.1	NC_000009.12
364	AQP7	NM_001170.1	NC_000009.12
366	AQP9	NM_020980.3	NC_000015.10
366	AQP9	NM_020980.3	NC_000015.10
366	AQP9	NM_020980.3	NC_000015.10
366	AQP9	NM_020980.3	NC_000015.10
367	AR	NM_000044.3	NC_000023.11
367	AR	NM_000044.3	NC_000023.11
367	AR	NM_000044.3	NC_000023.11
367	AR	NM_000044.3	NC_000023.11
368	ABCC6	NM_001171.5	NC_000016.10
368	ABCC6	NM_001171.5	NC_000016.10
368	ABCC6	NM_001171.5	NC_000016.10
368	ABCC6	NM_001171.5	NC_000016.10
369	ARAF	NM_001654.4	NC_000023.11
369	ARAF	NM_001654.4	NC_000023.11
369	ARAF	NM_001654.4	NC_000023.11
369	ARAF	NM_001654.4	NC_000023.11
372	ARCN1	NM_001655.4	NC_000011.10
372	ARCN1	NM_001655.4	NC_000011.10
372	ARCN1	NM_001655.4	NC_000011.10
372	ARCN1	NM_001655.4	NC_000011.10
373	TRIM23	NM_001656.3	NC_000005.10
373	TRIM23	NM_001656.3	NC_000005.10
373	TRIM23	NM_001656.3	NC_000005.10
373	TRIM23	NM_001656.3	NC_000005.10
374	AREG	NM_001657.3	NC_000004.12
374	AREG	NM_001657.3	NC_000004.12
374	AREG	NM_001657.3	NC_000004.12
374	AREG	NM_001657.3	NC_000004.12
375	ARF1	NM_001658.3	NC_000001.11
375	ARF1	NM_001658.3	NC_000001.11
375	ARF1	NM_001658.3	NC_000001.11
375	ARF1	NM_001658.3	NC_000001.11
377	ARF3	NM_001659.2	NC_000012.12
377	ARF3	NM_001659.2	NC_000012.12
377	ARF3	NM_001659.2	NC_000012.12
377	ARF3	NM_001659.2	NC_000012.12
378	ARF4	NM_001660.3	NC_000003.12
378	ARF4	NM_001660.3	NC_000003.12
378	ARF4	NM_001660.3	NC_000003.12
378	ARF4	NM_001660.3	NC_000003.12
379	ARL4D	NM_001661.3	NC_000017.11
379	ARL4D	NM_001661.3	NC_000017.11
379	ARL4D	NM_001661.3	NC_000017.11
379	ARL4D	NM_001661.3	NC_000017.11
381	ARF5	NM_001662.3	NC_000007.14
381	ARF5	NM_001662.3	NC_000007.14
381	ARF5	NM_001662.3	NC_000007.14
381	ARF5	NM_001662.3	NC_000007.14
382	ARF6	NM_001663.3	NC_000014.9
382	ARF6	NM_001663.3	NC_000014.9
382	ARF6	NM_001663.3	NC_000014.9
382	ARF6	NM_001663.3	NC_000014.9
383	ARG1	NM_000045.3	NC_000006.12
383	ARG1	NM_000045.3	NC_000006.12
383	ARG1	NM_000045.3	NC_000006.12
383	ARG1	NM_000045.3	NC_000006.12
384	ARG2	NM_001172.3	NC_000014.9
384	ARG2	NM_001172.3	NC_000014.9
384	ARG2	NM_001172.3	NC_000014.9
384	ARG2	NM_001172.3	NC_000014.9
387	RHOA	NM_001664.2	NC_000003.12
387	RHOA	NM_001664.2	NC_000003.12
387	RHOA	NM_001664.2	NC_000003.12
387	RHOA	NM_001664.2	NC_000003.12
388	RHOB	NM_004040.3	NC_000002.12
388	RHOB	NM_004040.3	NC_000002.12
388	RHOB	NM_004040.3	NC_000002.12
388	RHOB	NM_004040.3	NC_000002.12
389	RHOC	NM_175744.4	NC_000001.11
389	RHOC	NM_175744.4	NC_000001.11
389	RHOC	NM_175744.4	NC_000001.11
389	RHOC	NM_175744.4	NC_000001.11
390	RND3	NM_001254738.1	NC_000002.12
390	RND3	NM_001254738.1	NC_000002.12
390	RND3	NM_001254738.1	NC_000002.12
390	RND3	NM_001254738.1	NC_000002.12
391	RHOG	NM_001665.3	NC_000011.10
391	RHOG	NM_001665.3	NC_000011.10
391	RHOG	NM_001665.3	NC_000011.10
391	RHOG	NM_001665.3	NC_000011.10
392	ARHGAP1	NM_004308.3	NC_000011.10
392	ARHGAP1	NM_004308.3	NC_000011.10
392	ARHGAP1	NM_004308.3	NC_000011.10
392	ARHGAP1	NM_004308.3	NC_000011.10
393	ARHGAP4	NM_001666.4	NC_000023.11
393	ARHGAP4	NM_001666.4	NC_000023.11
393	ARHGAP4	NM_001666.4	NC_000023.11
393	ARHGAP4	NM_001666.4	NC_000023.11
394	ARHGAP5	NM_001030055.1	NC_000014.9
394	ARHGAP5	NM_001030055.1	NC_000014.9
394	ARHGAP5	NM_001030055.1	NC_000014.9
394	ARHGAP5	NM_001030055.1	NC_000014.9
395	ARHGAP6	NM_013427.2	NC_000023.11
395	ARHGAP6	NM_013427.2	NC_000023.11
395	ARHGAP6	NM_013427.2	NC_000023.11
395	ARHGAP6	NM_013427.2	NC_000023.11
396	ARHGDIA	NM_004309.5	NC_000017.11
396	ARHGDIA	NM_004309.5	NC_000017.11
396	ARHGDIA	NM_004309.5	NC_000017.11
396	ARHGDIA	NM_004309.5	NC_000017.11
397	ARHGDIB	NM_001175.5	NC_000012.12
397	ARHGDIB	NM_001175.5	NC_000012.12
397	ARHGDIB	NM_001175.5	NC_000012.12
397	ARHGDIB	NM_001175.5	NC_000012.12
398	ARHGDIG	NM_001176.3	NC_000016.10
398	ARHGDIG	NM_001176.3	NC_000016.10
398	ARHGDIG	NM_001176.3	NC_000016.10
398	ARHGDIG	NM_001176.3	NC_000016.10
399	RHOH	NM_001278368.1	NC_000004.12
399	RHOH	NM_001278368.1	NC_000004.12
399	RHOH	NM_001278368.1	NC_000004.12
399	RHOH	NM_001278368.1	NC_000004.12
400	ARL1	NM_001177.5	NC_000012.12
400	ARL1	NM_001177.5	NC_000012.12
400	ARL1	NM_001177.5	NC_000012.12
400	ARL1	NM_001177.5	NC_000012.12
401	PHOX2A	NM_005169.3	NC_000011.10
401	PHOX2A	NM_005169.3	NC_000011.10
401	PHOX2A	NM_005169.3	NC_000011.10
401	PHOX2A	NM_005169.3	NC_000011.10
402	ARL2	NM_001667.3	NC_000011.10
402	ARL2	NM_001667.3	NC_000011.10
402	ARL2	NM_001667.3	NC_000011.10
402	ARL2	NM_001667.3	NC_000011.10
403	ARL3	NM_004311.3	NC_000010.11
403	ARL3	NM_004311.3	NC_000010.11
403	ARL3	NM_004311.3	NC_000010.11
403	ARL3	NM_004311.3	NC_000010.11
405	ARNT	NM_001668.3	NC_000001.11
405	ARNT	NM_001668.3	NC_000001.11
405	ARNT	NM_001668.3	NC_000001.11
405	ARNT	NM_001668.3	NC_000001.11
406	ARNTL	NM_001030272.2	NC_000011.10
406	ARNTL	NM_001030272.2	NC_000011.10
406	ARNTL	NM_001030272.2	NC_000011.10
406	ARNTL	NM_001030272.2	NC_000011.10
407	ARR3	NM_004312.2	NC_000023.11
407	ARR3	NM_004312.2	NC_000023.11
407	ARR3	NM_004312.2	NC_000023.11
407	ARR3	NM_004312.2	NC_000023.11
408	ARRB1	NM_020251.3	NC_000011.10
408	ARRB1	NM_020251.3	NC_000011.10
408	ARRB1	NM_020251.3	NC_000011.10
408	ARRB1	NM_020251.3	NC_000011.10
409	ARRB2	NM_001257330.1	NC_000017.11
409	ARRB2	NM_001257330.1	NC_000017.11
409	ARRB2	NM_001257330.1	NC_000017.11
409	ARRB2	NM_001257330.1	NC_000017.11
410	ARSA	NM_001085426.2	NC_000022.11
410	ARSA	NM_001085426.2	NC_000022.11
410	ARSA	NM_001085426.2	NC_000022.11
410	ARSA	NM_001085426.2	NC_000022.11
411	ARSB	NM_000046.3	NC_000005.10
411	ARSB	NM_000046.3	NC_000005.10
411	ARSB	NM_000046.3	NC_000005.10
411	ARSB	NM_000046.3	NC_000005.10
412	STS	NM_000351.4	NC_000023.11
412	STS	NM_000351.4	NC_000023.11
412	STS	NM_000351.4	NC_000023.11
412	STS	NM_000351.4	NC_000023.11
414	ARSD	NM_001669.3	NC_000023.11
414	ARSD	NM_001669.3	NC_000023.11
414	ARSD	NM_001669.3	NC_000023.11
414	ARSD	NM_001669.3	NC_000023.11
415	ARSE	NM_000047.2	NC_000023.11
415	ARSE	NM_000047.2	NC_000023.11
415	ARSE	NM_000047.2	NC_000023.11
415	ARSE	NM_000047.2	NC_000023.11
416	ARSF	NM_001201538.1	NC_000023.11
416	ARSF	NM_001201538.1	NC_000023.11
416	ARSF	NM_001201538.1	NC_000023.11
416	ARSF	NM_001201538.1	NC_000023.11
417	ART1	NM_004314.2	NC_000011.10
417	ART1	NM_004314.2	NC_000011.10
417	ART1	NM_004314.2	NC_000011.10
417	ART1	NM_004314.2	NC_000011.10
419	ART3	NM_001179.5	NC_000004.12
419	ART3	NM_001179.5	NC_000004.12
419	ART3	NM_001179.5	NC_000004.12
419	ART3	NM_001179.5	NC_000004.12
420	ART4	NM_021071.2	NC_000012.12
420	ART4	NM_021071.2	NC_000012.12
420	ART4	NM_021071.2	NC_000012.12
420	ART4	NM_021071.2	NC_000012.12
421	ARVCF	NM_001670.2	NC_000022.11
421	ARVCF	NM_001670.2	NC_000022.11
421	ARVCF	NM_001670.2	NC_000022.11
421	ARVCF	NM_001670.2	NC_000022.11
427	ASAH1	NM_004315.4	NC_000008.11
427	ASAH1	NM_004315.4	NC_000008.11
427	ASAH1	NM_004315.4	NC_000008.11
427	ASAH1	NM_004315.4	NC_000008.11
429	ASCL1	NM_004316.3	NC_000012.12
429	ASCL1	NM_004316.3	NC_000012.12
429	ASCL1	NM_004316.3	NC_000012.12
429	ASCL1	NM_004316.3	NC_000012.12
430	ASCL2	NM_005170.2	NC_000011.10
430	ASCL2	NM_005170.2	NC_000011.10
430	ASCL2	NM_005170.2	NC_000011.10
430	ASCL2	NM_005170.2	NC_000011.10
432	ASGR1	NM_001671.4	NC_000017.11
432	ASGR1	NM_001671.4	NC_000017.11
432	ASGR1	NM_001671.4	NC_000017.11
432	ASGR1	NM_001671.4	NC_000017.11
433	ASGR2	NM_080913.3	NC_000017.11
433	ASGR2	NM_080913.3	NC_000017.11
433	ASGR2	NM_080913.3	NC_000017.11
433	ASGR2	NM_080913.3	NC_000017.11
434	ASIP	NM_001672.2	NC_000020.11
434	ASIP	NM_001672.2	NC_000020.11
434	ASIP	NM_001672.2	NC_000020.11
434	ASIP	NM_001672.2	NC_000020.11
435	ASL	NM_000048.3	NC_000007.14
435	ASL	NM_000048.3	NC_000007.14
435	ASL	NM_000048.3	NC_000007.14
435	ASL	NM_000048.3	NC_000007.14
438	ASMT	NM_001171039.1	NC_000023.11
438	ASMT	NM_001171039.1	NC_000023.11
438	ASMT	NM_001171039.1	NC_000023.11
438	ASMT	NM_001171039.1	NC_000023.11
439	ASNA1	NM_004317.2	NC_000019.10
439	ASNA1	NM_004317.2	NC_000019.10
439	ASNA1	NM_004317.2	NC_000019.10
439	ASNA1	NM_004317.2	NC_000019.10
440	ASNS	NM_001673.4	NC_000007.14
440	ASNS	NM_001673.4	NC_000007.14
440	ASNS	NM_001673.4	NC_000007.14
440	ASNS	NM_001673.4	NC_000007.14
443	ASPA	NM_001128085.1	NC_000017.11
443	ASPA	NM_001128085.1	NC_000017.11
443	ASPA	NM_001128085.1	NC_000017.11
443	ASPA	NM_001128085.1	NC_000017.11
444	ASPH	NM_004318.3	NC_000008.11
444	ASPH	NM_004318.3	NC_000008.11
444	ASPH	NM_004318.3	NC_000008.11
444	ASPH	NM_004318.3	NC_000008.11
445	ASS1	NM_054012.3	NC_000009.12
445	ASS1	NM_054012.3	NC_000009.12
445	ASS1	NM_054012.3	NC_000009.12
445	ASS1	NM_054012.3	NC_000009.12
460	ASTN1	NM_004319.2	NC_000001.11
460	ASTN1	NM_004319.2	NC_000001.11
460	ASTN1	NM_004319.2	NC_000001.11
460	ASTN1	NM_004319.2	NC_000001.11
462	SERPINC1	NM_000488.3	NC_000001.11
462	SERPINC1	NM_000488.3	NC_000001.11
462	SERPINC1	NM_000488.3	NC_000001.11
462	SERPINC1	NM_000488.3	NC_000001.11
463	ZFHX3	NM_006885.3	NC_000016.10
463	ZFHX3	NM_006885.3	NC_000016.10
463	ZFHX3	NM_006885.3	NC_000016.10
463	ZFHX3	NM_006885.3	NC_000016.10
466	ATF1	NM_005171.4	NC_000012.12
466	ATF1	NM_005171.4	NC_000012.12
466	ATF1	NM_005171.4	NC_000012.12
466	ATF1	NM_005171.4	NC_000012.12
467	ATF3	NM_001674.3	NC_000001.11
467	ATF3	NM_001674.3	NC_000001.11
467	ATF3	NM_001674.3	NC_000001.11
467	ATF3	NM_001674.3	NC_000001.11
468	ATF4	NM_001675.4	NC_000022.11
468	ATF4	NM_001675.4	NC_000022.11
468	ATF4	NM_001675.4	NC_000022.11
468	ATF4	NM_001675.4	NC_000022.11
471	ATIC	NM_004044.6	NC_000002.12
471	ATIC	NM_004044.6	NC_000002.12
471	ATIC	NM_004044.6	NC_000002.12
471	ATIC	NM_004044.6	NC_000002.12
472	ATM	NM_000051.3	NC_000011.10
472	ATM	NM_000051.3	NC_000011.10
472	ATM	NM_000051.3	NC_000011.10
472	ATM	NM_000051.3	NC_000011.10
473	RERE	NM_012102.3	NC_000001.11
473	RERE	NM_012102.3	NC_000001.11
473	RERE	NM_012102.3	NC_000001.11
473	RERE	NM_012102.3	NC_000001.11
474	ATOH1	NM_005172.1	NC_000004.12
474	ATOH1	NM_005172.1	NC_000004.12
474	ATOH1	NM_005172.1	NC_000004.12
474	ATOH1	NM_005172.1	NC_000004.12
475	ATOX1	NM_004045.3	NC_000005.10
475	ATOX1	NM_004045.3	NC_000005.10
475	ATOX1	NM_004045.3	NC_000005.10
475	ATOX1	NM_004045.3	NC_000005.10
476	ATP1A1	NM_000701.7	NC_000001.11
476	ATP1A1	NM_000701.7	NC_000001.11
476	ATP1A1	NM_000701.7	NC_000001.11
476	ATP1A1	NM_000701.7	NC_000001.11
477	ATP1A2	NM_000702.3	NC_000001.11
477	ATP1A2	NM_000702.3	NC_000001.11
477	ATP1A2	NM_000702.3	NC_000001.11
477	ATP1A2	NM_000702.3	NC_000001.11
478	ATP1A3	NM_001256214.1	NC_000019.10
478	ATP1A3	NM_001256214.1	NC_000019.10
478	ATP1A3	NM_001256214.1	NC_000019.10
478	ATP1A3	NM_001256214.1	NC_000019.10
479	ATP12A	NM_001676.5	NC_000013.11
479	ATP12A	NM_001676.5	NC_000013.11
479	ATP12A	NM_001676.5	NC_000013.11
479	ATP12A	NM_001676.5	NC_000013.11
480	ATP1A4	NM_144699.3	NC_000001.11
480	ATP1A4	NM_144699.3	NC_000001.11
480	ATP1A4	NM_144699.3	NC_000001.11
480	ATP1A4	NM_144699.3	NC_000001.11
481	ATP1B1	NM_001677.3	NC_000001.11
481	ATP1B1	NM_001677.3	NC_000001.11
481	ATP1B1	NM_001677.3	NC_000001.11
481	ATP1B1	NM_001677.3	NC_000001.11
482	ATP1B2	NM_001678.4	NC_000017.11
482	ATP1B2	NM_001678.4	NC_000017.11
482	ATP1B2	NM_001678.4	NC_000017.11
482	ATP1B2	NM_001678.4	NC_000017.11
483	ATP1B3	NM_001679.2	NC_000003.12
483	ATP1B3	NM_001679.2	NC_000003.12
483	ATP1B3	NM_001679.2	NC_000003.12
483	ATP1B3	NM_001679.2	NC_000003.12
486	FXYD2	NM_001680.4	NC_000011.10
486	FXYD2	NM_001680.4	NC_000011.10
486	FXYD2	NM_001680.4	NC_000011.10
486	FXYD2	NM_001680.4	NC_000011.10
487	ATP2A1	NM_004320.4	NC_000016.10
487	ATP2A1	NM_004320.4	NC_000016.10
487	ATP2A1	NM_004320.4	NC_000016.10
487	ATP2A1	NM_004320.4	NC_000016.10
488	ATP2A2	NM_170665.3	NC_000012.12
488	ATP2A2	NM_170665.3	NC_000012.12
488	ATP2A2	NM_170665.3	NC_000012.12
488	ATP2A2	NM_170665.3	NC_000012.12
489	ATP2A3	NM_005173.3	NC_000017.11
489	ATP2A3	NM_005173.3	NC_000017.11
489	ATP2A3	NM_005173.3	NC_000017.11
489	ATP2A3	NM_005173.3	NC_000017.11
490	ATP2B1	NM_001682.2	NC_000012.12
490	ATP2B1	NM_001682.2	NC_000012.12
490	ATP2B1	NM_001682.2	NC_000012.12
490	ATP2B1	NM_001682.2	NC_000012.12
491	ATP2B2	NM_001683.3	NC_000003.12
491	ATP2B2	NM_001683.3	NC_000003.12
491	ATP2B2	NM_001683.3	NC_000003.12
491	ATP2B2	NM_001683.3	NC_000003.12
492	ATP2B3	NM_001001344.2	NC_000023.11
492	ATP2B3	NM_001001344.2	NC_000023.11
492	ATP2B3	NM_001001344.2	NC_000023.11
492	ATP2B3	NM_001001344.2	NC_000023.11
493	ATP2B4	NM_001684.4	NC_000001.11
493	ATP2B4	NM_001684.4	NC_000001.11
493	ATP2B4	NM_001684.4	NC_000001.11
493	ATP2B4	NM_001684.4	NC_000001.11
495	ATP4A	NM_000704.2	NC_000019.10
495	ATP4A	NM_000704.2	NC_000019.10
495	ATP4A	NM_000704.2	NC_000019.10
495	ATP4A	NM_000704.2	NC_000019.10
496	ATP4B	NM_000705.3	NC_000013.11
496	ATP4B	NM_000705.3	NC_000013.11
496	ATP4B	NM_000705.3	NC_000013.11
496	ATP4B	NM_000705.3	NC_000013.11
498	ATP5A1	NM_004046.5	NC_000018.10
498	ATP5A1	NM_004046.5	NC_000018.10
498	ATP5A1	NM_004046.5	NC_000018.10
498	ATP5A1	NM_004046.5	NC_000018.10
501	ALDH7A1	NM_001182.4	NC_000005.10
501	ALDH7A1	NM_001182.4	NC_000005.10
501	ALDH7A1	NM_001182.4	NC_000005.10
501	ALDH7A1	NM_001182.4	NC_000005.10
506	ATP5B	NM_001686.3	NC_000012.12
506	ATP5B	NM_001686.3	NC_000012.12
506	ATP5B	NM_001686.3	NC_000012.12
506	ATP5B	NM_001686.3	NC_000012.12
509	ATP5C1	NM_005174.2	NC_000010.11
509	ATP5C1	NM_005174.2	NC_000010.11
509	ATP5C1	NM_005174.2	NC_000010.11
509	ATP5C1	NM_005174.2	NC_000010.11
513	ATP5D	NM_001001975.1	NC_000019.10
513	ATP5D	NM_001001975.1	NC_000019.10
513	ATP5D	NM_001001975.1	NC_000019.10
513	ATP5D	NM_001001975.1	NC_000019.10
514	ATP5E	NM_006886.3	NC_000020.11
514	ATP5E	NM_006886.3	NC_000020.11
514	ATP5E	NM_006886.3	NC_000020.11
514	ATP5E	NM_006886.3	NC_000020.11
515	ATP5F1	NM_001688.4	NC_000001.11
515	ATP5F1	NM_001688.4	NC_000001.11
515	ATP5F1	NM_001688.4	NC_000001.11
515	ATP5F1	NM_001688.4	NC_000001.11
516	ATP5G1	NM_001002027.1	NC_000017.11
516	ATP5G1	NM_001002027.1	NC_000017.11
516	ATP5G1	NM_001002027.1	NC_000017.11
516	ATP5G1	NM_001002027.1	NC_000017.11
517	ATP5G2	NM_001002031.2	NC_000012.12
517	ATP5G2	NM_001002031.2	NC_000012.12
517	ATP5G2	NM_001002031.2	NC_000012.12
517	ATP5G2	NM_001002031.2	NC_000012.12
518	ATP5G3	NM_001689.4	NC_000002.12
518	ATP5G3	NM_001689.4	NC_000002.12
518	ATP5G3	NM_001689.4	NC_000002.12
518	ATP5G3	NM_001689.4	NC_000002.12
521	ATP5I	NM_007100.3	NC_000004.12
521	ATP5I	NM_007100.3	NC_000004.12
521	ATP5I	NM_007100.3	NC_000004.12
521	ATP5I	NM_007100.3	NC_000004.12
522	ATP5J	NM_001003703.1	NC_000021.9
522	ATP5J	NM_001003703.1	NC_000021.9
522	ATP5J	NM_001003703.1	NC_000021.9
522	ATP5J	NM_001003703.1	NC_000021.9
523	ATP6V1A	NM_001690.3	NC_000003.12
523	ATP6V1A	NM_001690.3	NC_000003.12
523	ATP6V1A	NM_001690.3	NC_000003.12
523	ATP6V1A	NM_001690.3	NC_000003.12
525	ATP6V1B1	NM_001692.3	NC_000002.12
525	ATP6V1B1	NM_001692.3	NC_000002.12
525	ATP6V1B1	NM_001692.3	NC_000002.12
525	ATP6V1B1	NM_001692.3	NC_000002.12
526	ATP6V1B2	NM_001693.3	NC_000008.11
526	ATP6V1B2	NM_001693.3	NC_000008.11
526	ATP6V1B2	NM_001693.3	NC_000008.11
526	ATP6V1B2	NM_001693.3	NC_000008.11
527	ATP6V0C	NM_001694.3	NC_000016.10
527	ATP6V0C	NM_001694.3	NC_000016.10
527	ATP6V0C	NM_001694.3	NC_000016.10
527	ATP6V0C	NM_001694.3	NC_000016.10
528	ATP6V1C1	NM_001695.4	NC_000008.11
528	ATP6V1C1	NM_001695.4	NC_000008.11
528	ATP6V1C1	NM_001695.4	NC_000008.11
528	ATP6V1C1	NM_001695.4	NC_000008.11
529	ATP6V1E1	NM_001696.3	NC_000022.11
529	ATP6V1E1	NM_001696.3	NC_000022.11
529	ATP6V1E1	NM_001696.3	NC_000022.11
529	ATP6V1E1	NM_001696.3	NC_000022.11
533	ATP6V0B	NM_004047.4	NC_000001.11
533	ATP6V0B	NM_004047.4	NC_000001.11
533	ATP6V0B	NM_004047.4	NC_000001.11
533	ATP6V0B	NM_004047.4	NC_000001.11
534	ATP6V1G2	NM_130463.3	NC_000006.12
534	ATP6V1G2	NM_130463.3	NC_000006.12
534	ATP6V1G2	NM_130463.3	NC_000006.12
534	ATP6V1G2	NM_130463.3	NC_000006.12
535	ATP6V0A1	NM_001130020.1	NC_000017.11
535	ATP6V0A1	NM_001130020.1	NC_000017.11
535	ATP6V0A1	NM_001130020.1	NC_000017.11
535	ATP6V0A1	NM_001130020.1	NC_000017.11
537	ATP6AP1	NM_001183.5	NC_000023.11
537	ATP6AP1	NM_001183.5	NC_000023.11
537	ATP6AP1	NM_001183.5	NC_000023.11
537	ATP6AP1	NM_001183.5	NC_000023.11
538	ATP7A	NM_000052.6	NC_000023.11
538	ATP7A	NM_000052.6	NC_000023.11
538	ATP7A	NM_000052.6	NC_000023.11
538	ATP7A	NM_000052.6	NC_000023.11
539	ATP5O	NM_001697.2	NC_000021.9
539	ATP5O	NM_001697.2	NC_000021.9
539	ATP5O	NM_001697.2	NC_000021.9
539	ATP5O	NM_001697.2	NC_000021.9
540	ATP7B	NM_000053.3	NC_000013.11
540	ATP7B	NM_000053.3	NC_000013.11
540	ATP7B	NM_000053.3	NC_000013.11
540	ATP7B	NM_000053.3	NC_000013.11
545	ATR	NM_001184.3	NC_000003.12
545	ATR	NM_001184.3	NC_000003.12
545	ATR	NM_001184.3	NC_000003.12
545	ATR	NM_001184.3	NC_000003.12
546	ATRX	NM_000489.4	NC_000023.11
546	ATRX	NM_000489.4	NC_000023.11
546	ATRX	NM_000489.4	NC_000023.11
546	ATRX	NM_000489.4	NC_000023.11
547	KIF1A	NM_004321.6	NC_000002.12
547	KIF1A	NM_004321.6	NC_000002.12
547	KIF1A	NM_004321.6	NC_000002.12
547	KIF1A	NM_004321.6	NC_000002.12
549	AUH	NM_001698.2	NC_000009.12
549	AUH	NM_001698.2	NC_000009.12
549	AUH	NM_001698.2	NC_000009.12
549	AUH	NM_001698.2	NC_000009.12
550	AUP1	NM_181575.4	NC_000002.12
550	AUP1	NM_181575.4	NC_000002.12
550	AUP1	NM_181575.4	NC_000002.12
550	AUP1	NM_181575.4	NC_000002.12
551	AVP	NM_000490.4	NC_000020.11
551	AVP	NM_000490.4	NC_000020.11
551	AVP	NM_000490.4	NC_000020.11
551	AVP	NM_000490.4	NC_000020.11
552	AVPR1A	NM_000706.4	NC_000012.12
552	AVPR1A	NM_000706.4	NC_000012.12
552	AVPR1A	NM_000706.4	NC_000012.12
552	AVPR1A	NM_000706.4	NC_000012.12
553	AVPR1B	NM_000707.3	NC_000001.11
553	AVPR1B	NM_000707.3	NC_000001.11
553	AVPR1B	NM_000707.3	NC_000001.11
553	AVPR1B	NM_000707.3	NC_000001.11
554	AVPR2	NM_000054.4	NC_000023.11
554	AVPR2	NM_000054.4	NC_000023.11
554	AVPR2	NM_000054.4	NC_000023.11
554	AVPR2	NM_000054.4	NC_000023.11
558	AXL	NM_021913.4	NC_000019.10
558	AXL	NM_021913.4	NC_000019.10
558	AXL	NM_021913.4	NC_000019.10
558	AXL	NM_021913.4	NC_000019.10
563	AZGP1	NM_001185.3	NC_000007.14
563	AZGP1	NM_001185.3	NC_000007.14
563	AZGP1	NM_001185.3	NC_000007.14
563	AZGP1	NM_001185.3	NC_000007.14
566	AZU1	NM_001700.3	NC_000019.10
566	AZU1	NM_001700.3	NC_000019.10
566	AZU1	NM_001700.3	NC_000019.10
566	AZU1	NM_001700.3	NC_000019.10
567	B2M	NM_004048.2	NC_000015.10
567	B2M	NM_004048.2	NC_000015.10
567	B2M	NM_004048.2	NC_000015.10
567	B2M	NM_004048.2	NC_000015.10
570	BAAT	NM_001701.3	NC_000009.12
570	BAAT	NM_001701.3	NC_000009.12
570	BAAT	NM_001701.3	NC_000009.12
570	BAAT	NM_001701.3	NC_000009.12
571	BACH1	NM_001186.3	NC_000021.9
571	BACH1	NM_001186.3	NC_000021.9
571	BACH1	NM_001186.3	NC_000021.9
571	BACH1	NM_001186.3	NC_000021.9
572	BAD	NM_004322.3	NC_000011.10
572	BAD	NM_004322.3	NC_000011.10
572	BAD	NM_004322.3	NC_000011.10
572	BAD	NM_004322.3	NC_000011.10
573	BAG1	NM_004323.5	NC_000009.12
573	BAG1	NM_004323.5	NC_000009.12
573	BAG1	NM_004323.5	NC_000009.12
573	BAG1	NM_004323.5	NC_000009.12
575	ADGRB1	NM_001702.2	NC_000008.11
575	ADGRB1	NM_001702.2	NC_000008.11
575	ADGRB1	NM_001702.2	NC_000008.11
575	ADGRB1	NM_001702.2	NC_000008.11
576	ADGRB2	NM_001294335.1	NC_000001.11
576	ADGRB2	NM_001294335.1	NC_000001.11
576	ADGRB2	NM_001294335.1	NC_000001.11
576	ADGRB2	NM_001294335.1	NC_000001.11
577	ADGRB3	NM_001704.2	NC_000006.12
577	ADGRB3	NM_001704.2	NC_000006.12
577	ADGRB3	NM_001704.2	NC_000006.12
577	ADGRB3	NM_001704.2	NC_000006.12
578	BAK1	NM_001188.3	NC_000006.12
578	BAK1	NM_001188.3	NC_000006.12
578	BAK1	NM_001188.3	NC_000006.12
578	BAK1	NM_001188.3	NC_000006.12
579	NKX3-2	NM_001189.3	NC_000004.12
579	NKX3-2	NM_001189.3	NC_000004.12
579	NKX3-2	NM_001189.3	NC_000004.12
579	NKX3-2	NM_001189.3	NC_000004.12
580	BARD1	NM_000465.3	NC_000002.12
580	BARD1	NM_000465.3	NC_000002.12
580	BARD1	NM_000465.3	NC_000002.12
580	BARD1	NM_000465.3	NC_000002.12
581	BAX	NM_138761.3	NC_000019.10
581	BAX	NM_138761.3	NC_000019.10
581	BAX	NM_138761.3	NC_000019.10
581	BAX	NM_138761.3	NC_000019.10
582	BBS1	NM_024649.4	NC_000011.10
582	BBS1	NM_024649.4	NC_000011.10
582	BBS1	NM_024649.4	NC_000011.10
582	BBS1	NM_024649.4	NC_000011.10
583	BBS2	NM_031885.3	NC_000016.10
583	BBS2	NM_031885.3	NC_000016.10
583	BBS2	NM_031885.3	NC_000016.10
583	BBS2	NM_031885.3	NC_000016.10
585	BBS4	NM_033028.4	NC_000015.10
585	BBS4	NM_033028.4	NC_000015.10
585	BBS4	NM_033028.4	NC_000015.10
585	BBS4	NM_033028.4	NC_000015.10
586	BCAT1	NM_005504.6	NC_000012.12
586	BCAT1	NM_005504.6	NC_000012.12
586	BCAT1	NM_005504.6	NC_000012.12
586	BCAT1	NM_005504.6	NC_000012.12
587	BCAT2	NM_001190.3	NC_000019.10
587	BCAT2	NM_001190.3	NC_000019.10
587	BCAT2	NM_001190.3	NC_000019.10
587	BCAT2	NM_001190.3	NC_000019.10
590	BCHE	NM_000055.2	NC_000003.12
590	BCHE	NM_000055.2	NC_000003.12
590	BCHE	NM_000055.2	NC_000003.12
590	BCHE	NM_000055.2	NC_000003.12
593	BCKDHA	NM_000709.3	NC_000019.10
593	BCKDHA	NM_000709.3	NC_000019.10
593	BCKDHA	NM_000709.3	NC_000019.10
593	BCKDHA	NM_000709.3	NC_000019.10
594	BCKDHB	NM_000056.3	NC_000006.12
594	BCKDHB	NM_000056.3	NC_000006.12
594	BCKDHB	NM_000056.3	NC_000006.12
594	BCKDHB	NM_000056.3	NC_000006.12
595	CCND1	NM_053056.2	NC_000011.10
595	CCND1	NM_053056.2	NC_000011.10
595	CCND1	NM_053056.2	NC_000011.10
595	CCND1	NM_053056.2	NC_000011.10
596	BCL2	NM_000633.2	NC_000018.10
596	BCL2	NM_000633.2	NC_000018.10
596	BCL2	NM_000633.2	NC_000018.10
596	BCL2	NM_000633.2	NC_000018.10
597	BCL2A1	NM_004049.3	NC_000015.10
597	BCL2A1	NM_004049.3	NC_000015.10
597	BCL2A1	NM_004049.3	NC_000015.10
597	BCL2A1	NM_004049.3	NC_000015.10
598	BCL2L1	NM_138578.1	NC_000020.11
598	BCL2L1	NM_138578.1	NC_000020.11
598	BCL2L1	NM_138578.1	NC_000020.11
598	BCL2L1	NM_138578.1	NC_000020.11
599	BCL2L2	NM_001199839.1	NC_000014.9
599	BCL2L2	NM_001199839.1	NC_000014.9
599	BCL2L2	NM_001199839.1	NC_000014.9
599	BCL2L2	NM_001199839.1	NC_000014.9
602	BCL3	NM_005178.4	NC_000019.10
602	BCL3	NM_005178.4	NC_000019.10
602	BCL3	NM_005178.4	NC_000019.10
602	BCL3	NM_005178.4	NC_000019.10
604	BCL6	NM_001706.4	NC_000003.12
604	BCL6	NM_001706.4	NC_000003.12
604	BCL6	NM_001706.4	NC_000003.12
604	BCL6	NM_001706.4	NC_000003.12
605	BCL7A	NM_001024808.2	NC_000012.12
605	BCL7A	NM_001024808.2	NC_000012.12
605	BCL7A	NM_001024808.2	NC_000012.12
605	BCL7A	NM_001024808.2	NC_000012.12
607	BCL9	NM_004326.3	NC_000001.11
607	BCL9	NM_004326.3	NC_000001.11
607	BCL9	NM_004326.3	NC_000001.11
607	BCL9	NM_004326.3	NC_000001.11
608	TNFRSF17	NM_001192.2	NC_000016.10
608	TNFRSF17	NM_001192.2	NC_000016.10
608	TNFRSF17	NM_001192.2	NC_000016.10
608	TNFRSF17	NM_001192.2	NC_000016.10
610	HCN2	NM_001194.3	NC_000019.10
610	HCN2	NM_001194.3	NC_000019.10
610	HCN2	NM_001194.3	NC_000019.10
610	HCN2	NM_001194.3	NC_000019.10
611	OPN1SW	NM_001708.2	NC_000007.14
611	OPN1SW	NM_001708.2	NC_000007.14
611	OPN1SW	NM_001708.2	NC_000007.14
611	OPN1SW	NM_001708.2	NC_000007.14
613	BCR	NM_004327.3	NC_000022.11
613	BCR	NM_004327.3	NC_000022.11
613	BCR	NM_004327.3	NC_000022.11
613	BCR	NM_004327.3	NC_000022.11
617	BCS1L	NM_001079866.1	NC_000002.12
617	BCS1L	NM_001079866.1	NC_000002.12
617	BCS1L	NM_001079866.1	NC_000002.12
617	BCS1L	NM_001079866.1	NC_000002.12
622	BDH1	NM_004051.4	NC_000003.12
622	BDH1	NM_004051.4	NC_000003.12
622	BDH1	NM_004051.4	NC_000003.12
622	BDH1	NM_004051.4	NC_000003.12
623	BDKRB1	NM_000710.3	NC_000014.9
623	BDKRB1	NM_000710.3	NC_000014.9
623	BDKRB1	NM_000710.3	NC_000014.9
623	BDKRB1	NM_000710.3	NC_000014.9
624	BDKRB2	NM_000623.3	NC_000014.9
624	BDKRB2	NM_000623.3	NC_000014.9
624	BDKRB2	NM_000623.3	NC_000014.9
624	BDKRB2	NM_000623.3	NC_000014.9
629	CFB	NM_001710.5	NC_000006.12
629	CFB	NM_001710.5	NC_000006.12
629	CFB	NM_001710.5	NC_000006.12
629	CFB	NM_001710.5	NC_000006.12
631	BFSP1	NM_001195.4	NC_000020.11
631	BFSP1	NM_001195.4	NC_000020.11
631	BFSP1	NM_001195.4	NC_000020.11
631	BFSP1	NM_001195.4	NC_000020.11
632	BGLAP	NM_199173.4	NC_000001.11
632	BGLAP	NM_199173.4	NC_000001.11
632	BGLAP	NM_199173.4	NC_000001.11
632	BGLAP	NM_199173.4	NC_000001.11
633	BGN	NM_001711.4	NC_000023.11
633	BGN	NM_001711.4	NC_000023.11
633	BGN	NM_001711.4	NC_000023.11
633	BGN	NM_001711.4	NC_000023.11
634	CEACAM1	NM_001712.4	NC_000019.10
634	CEACAM1	NM_001712.4	NC_000019.10
634	CEACAM1	NM_001712.4	NC_000019.10
634	CEACAM1	NM_001712.4	NC_000019.10
635	BHMT	NM_001713.2	NC_000005.10
635	BHMT	NM_001713.2	NC_000005.10
635	BHMT	NM_001713.2	NC_000005.10
635	BHMT	NM_001713.2	NC_000005.10
636	BICD1	NM_001714.2	NC_000012.12
636	BICD1	NM_001714.2	NC_000012.12
636	BICD1	NM_001714.2	NC_000012.12
636	BICD1	NM_001714.2	NC_000012.12
637	BID	NM_001244567.1	NC_000022.11
637	BID	NM_001244567.1	NC_000022.11
637	BID	NM_001244567.1	NC_000022.11
637	BID	NM_001244567.1	NC_000022.11
638	BIK	NM_001197.4	NC_000022.11
638	BIK	NM_001197.4	NC_000022.11
638	BIK	NM_001197.4	NC_000022.11
638	BIK	NM_001197.4	NC_000022.11
639	PRDM1	NM_001198.3	NC_000006.12
639	PRDM1	NM_001198.3	NC_000006.12
639	PRDM1	NM_001198.3	NC_000006.12
639	PRDM1	NM_001198.3	NC_000006.12
640	BLK	NM_001715.2	NC_000008.11
640	BLK	NM_001715.2	NC_000008.11
640	BLK	NM_001715.2	NC_000008.11
640	BLK	NM_001715.2	NC_000008.11
641	BLM	NM_000057.3	NC_000015.10
641	BLM	NM_000057.3	NC_000015.10
641	BLM	NM_000057.3	NC_000015.10
641	BLM	NM_000057.3	NC_000015.10
642	BLMH	NM_000386.3	NC_000017.11
642	BLMH	NM_000386.3	NC_000017.11
642	BLMH	NM_000386.3	NC_000017.11
642	BLMH	NM_000386.3	NC_000017.11
643	CXCR5	NM_001716.4	NC_000011.10
643	CXCR5	NM_001716.4	NC_000011.10
643	CXCR5	NM_001716.4	NC_000011.10
643	CXCR5	NM_001716.4	NC_000011.10
644	BLVRA	NM_000712.3	NC_000007.14
644	BLVRA	NM_000712.3	NC_000007.14
644	BLVRA	NM_000712.3	NC_000007.14
644	BLVRA	NM_000712.3	NC_000007.14
645	BLVRB	NM_000713.2	NC_000019.10
645	BLVRB	NM_000713.2	NC_000019.10
645	BLVRB	NM_000713.2	NC_000019.10
645	BLVRB	NM_000713.2	NC_000019.10
646	BNC1	NM_001717.3	NC_000015.10
646	BNC1	NM_001717.3	NC_000015.10
646	BNC1	NM_001717.3	NC_000015.10
646	BNC1	NM_001717.3	NC_000015.10
648	BMI1	NM_005180.8	NC_000010.11
648	BMI1	NM_005180.8	NC_000010.11
648	BMI1	NM_005180.8	NC_000010.11
648	BMI1	NM_005180.8	NC_000010.11
649	BMP1	NM_006129.4	NC_000008.11
649	BMP1	NM_006129.4	NC_000008.11
649	BMP1	NM_006129.4	NC_000008.11
649	BMP1	NM_006129.4	NC_000008.11
650	BMP2	NM_001200.2	NC_000020.11
650	BMP2	NM_001200.2	NC_000020.11
650	BMP2	NM_001200.2	NC_000020.11
650	BMP2	NM_001200.2	NC_000020.11
651	BMP3	NM_001201.2	NC_000004.12
651	BMP3	NM_001201.2	NC_000004.12
651	BMP3	NM_001201.2	NC_000004.12
651	BMP3	NM_001201.2	NC_000004.12
652	BMP4	NM_001202.3	NC_000014.9
652	BMP4	NM_001202.3	NC_000014.9
652	BMP4	NM_001202.3	NC_000014.9
652	BMP4	NM_001202.3	NC_000014.9
653	BMP5	NM_021073.2	NC_000006.12
653	BMP5	NM_021073.2	NC_000006.12
653	BMP5	NM_021073.2	NC_000006.12
653	BMP5	NM_021073.2	NC_000006.12
654	BMP6	NM_001718.4	NC_000006.12
654	BMP6	NM_001718.4	NC_000006.12
654	BMP6	NM_001718.4	NC_000006.12
654	BMP6	NM_001718.4	NC_000006.12
655	BMP7	NM_001719.2	NC_000020.11
655	BMP7	NM_001719.2	NC_000020.11
655	BMP7	NM_001719.2	NC_000020.11
655	BMP7	NM_001719.2	NC_000020.11
656	BMP8B	NM_001720.3	NC_000001.11
656	BMP8B	NM_001720.3	NC_000001.11
656	BMP8B	NM_001720.3	NC_000001.11
656	BMP8B	NM_001720.3	NC_000001.11
657	BMPR1A	NM_004329.2	NC_000010.11
657	BMPR1A	NM_004329.2	NC_000010.11
657	BMPR1A	NM_004329.2	NC_000010.11
657	BMPR1A	NM_004329.2	NC_000010.11
658	BMPR1B	NM_001203.2	NC_000004.12
658	BMPR1B	NM_001203.2	NC_000004.12
658	BMPR1B	NM_001203.2	NC_000004.12
658	BMPR1B	NM_001203.2	NC_000004.12
659	BMPR2	NM_001204.6	NC_000002.12
659	BMPR2	NM_001204.6	NC_000002.12
659	BMPR2	NM_001204.6	NC_000002.12
659	BMPR2	NM_001204.6	NC_000002.12
660	BMX	NM_203281.2	NC_000023.11
660	BMX	NM_203281.2	NC_000023.11
660	BMX	NM_203281.2	NC_000023.11
660	BMX	NM_203281.2	NC_000023.11
661	POLR3D	NM_001722.2	NC_000008.11
661	POLR3D	NM_001722.2	NC_000008.11
661	POLR3D	NM_001722.2	NC_000008.11
661	POLR3D	NM_001722.2	NC_000008.11
662	BNIP1	NM_001205.2	NC_000005.10
662	BNIP1	NM_001205.2	NC_000005.10
662	BNIP1	NM_001205.2	NC_000005.10
662	BNIP1	NM_001205.2	NC_000005.10
663	BNIP2	NM_004330.2	NC_000015.10
663	BNIP2	NM_004330.2	NC_000015.10
663	BNIP2	NM_004330.2	NC_000015.10
663	BNIP2	NM_004330.2	NC_000015.10
664	BNIP3	NM_004052.3	NC_000010.11
664	BNIP3	NM_004052.3	NC_000010.11
664	BNIP3	NM_004052.3	NC_000010.11
664	BNIP3	NM_004052.3	NC_000010.11
665	BNIP3L	NM_004331.2	NC_000008.11
665	BNIP3L	NM_004331.2	NC_000008.11
665	BNIP3L	NM_004331.2	NC_000008.11
665	BNIP3L	NM_004331.2	NC_000008.11
666	BOK	NM_032515.4	NC_000002.12
666	BOK	NM_032515.4	NC_000002.12
666	BOK	NM_032515.4	NC_000002.12
666	BOK	NM_032515.4	NC_000002.12
667	DST	NM_001723.5	NC_000006.12
667	DST	NM_001723.5	NC_000006.12
667	DST	NM_001723.5	NC_000006.12
667	DST	NM_001723.5	NC_000006.12
668	FOXL2	NM_023067.3	NC_000003.12
668	FOXL2	NM_023067.3	NC_000003.12
668	FOXL2	NM_023067.3	NC_000003.12
668	FOXL2	NM_023067.3	NC_000003.12
669	BPGM	NM_001724.4	NC_000007.14
669	BPGM	NM_001724.4	NC_000007.14
669	BPGM	NM_001724.4	NC_000007.14
669	BPGM	NM_001724.4	NC_000007.14
670	BPHL	NM_004332.3	NC_000006.12
670	BPHL	NM_004332.3	NC_000006.12
670	BPHL	NM_004332.3	NC_000006.12
670	BPHL	NM_004332.3	NC_000006.12
671	BPI	NM_001725.2	NC_000020.11
671	BPI	NM_001725.2	NC_000020.11
671	BPI	NM_001725.2	NC_000020.11
671	BPI	NM_001725.2	NC_000020.11
672	BRCA1	NM_007294.3	NC_000017.11
672	BRCA1	NM_007294.3	NC_000017.11
672	BRCA1	NM_007294.3	NC_000017.11
672	BRCA1	NM_007294.3	NC_000017.11
673	BRAF	NM_004333.4	NC_000007.14
673	BRAF	NM_004333.4	NC_000007.14
673	BRAF	NM_004333.4	NC_000007.14
673	BRAF	NM_004333.4	NC_000007.14
675	BRCA2	NM_000059.3	NC_000013.11
675	BRCA2	NM_000059.3	NC_000013.11
675	BRCA2	NM_000059.3	NC_000013.11
675	BRCA2	NM_000059.3	NC_000013.11
676	BRDT	NM_001242805.2	NC_000001.11
676	BRDT	NM_001242805.2	NC_000001.11
676	BRDT	NM_001242805.2	NC_000001.11
676	BRDT	NM_001242805.2	NC_000001.11
677	ZFP36L1	NM_001244698.1	NC_000014.9
677	ZFP36L1	NM_001244698.1	NC_000014.9
677	ZFP36L1	NM_001244698.1	NC_000014.9
677	ZFP36L1	NM_001244698.1	NC_000014.9
678	ZFP36L2	NM_006887.4	NC_000002.12
678	ZFP36L2	NM_006887.4	NC_000002.12
678	ZFP36L2	NM_006887.4	NC_000002.12
678	ZFP36L2	NM_006887.4	NC_000002.12
680	BRS3	NM_001727.1	NC_000023.11
680	BRS3	NM_001727.1	NC_000023.11
680	BRS3	NM_001727.1	NC_000023.11
680	BRS3	NM_001727.1	NC_000023.11
682	BSG	NM_001728.3	NC_000019.10
682	BSG	NM_001728.3	NC_000019.10
682	BSG	NM_001728.3	NC_000019.10
682	BSG	NM_001728.3	NC_000019.10
683	BST1	NM_004334.2	NC_000004.12
683	BST1	NM_004334.2	NC_000004.12
683	BST1	NM_004334.2	NC_000004.12
683	BST1	NM_004334.2	NC_000004.12
684	BST2	NM_004335.3	NC_000019.10
684	BST2	NM_004335.3	NC_000019.10
684	BST2	NM_004335.3	NC_000019.10
684	BST2	NM_004335.3	NC_000019.10
685	BTC	NM_001729.2	NC_000004.12
685	BTC	NM_001729.2	NC_000004.12
685	BTC	NM_001729.2	NC_000004.12
685	BTC	NM_001729.2	NC_000004.12
686	BTD	NM_001281723.1	NC_000003.12
686	BTD	NM_001281723.1	NC_000003.12
686	BTD	NM_001281723.1	NC_000003.12
686	BTD	NM_001281723.1	NC_000003.12
687	KLF9	NM_001206.2	NC_000009.12
687	KLF9	NM_001206.2	NC_000009.12
687	KLF9	NM_001206.2	NC_000009.12
687	KLF9	NM_001206.2	NC_000009.12
688	KLF5	NM_001730.4	NC_000013.11
688	KLF5	NM_001730.4	NC_000013.11
688	KLF5	NM_001730.4	NC_000013.11
688	KLF5	NM_001730.4	NC_000013.11
689	BTF3	NM_001207.4	NC_000005.10
689	BTF3	NM_001207.4	NC_000005.10
689	BTF3	NM_001207.4	NC_000005.10
689	BTF3	NM_001207.4	NC_000005.10
694	BTG1	NM_001731.2	NC_000012.12
694	BTG1	NM_001731.2	NC_000012.12
694	BTG1	NM_001731.2	NC_000012.12
694	BTG1	NM_001731.2	NC_000012.12
695	BTK	NM_000061.2	NC_000023.11
695	BTK	NM_000061.2	NC_000023.11
695	BTK	NM_000061.2	NC_000023.11
695	BTK	NM_000061.2	NC_000023.11
696	BTN1A1	NM_001732.2	NC_000006.12
696	BTN1A1	NM_001732.2	NC_000006.12
696	BTN1A1	NM_001732.2	NC_000006.12
696	BTN1A1	NM_001732.2	NC_000006.12
699	BUB1	NM_004336.4	NC_000002.12
699	BUB1	NM_004336.4	NC_000002.12
699	BUB1	NM_004336.4	NC_000002.12
699	BUB1	NM_004336.4	NC_000002.12
701	BUB1B	NM_001211.5	NC_000015.10
701	BUB1B	NM_001211.5	NC_000015.10
701	BUB1B	NM_001211.5	NC_000015.10
701	BUB1B	NM_001211.5	NC_000015.10
705	BYSL	NM_004053.3	NC_000006.12
705	BYSL	NM_004053.3	NC_000006.12
705	BYSL	NM_004053.3	NC_000006.12
705	BYSL	NM_004053.3	NC_000006.12
706	TSPO	NM_000714.5	NC_000022.11
706	TSPO	NM_000714.5	NC_000022.11
706	TSPO	NM_000714.5	NC_000022.11
706	TSPO	NM_000714.5	NC_000022.11
708	C1QBP	NM_001212.3	NC_000017.11
708	C1QBP	NM_001212.3	NC_000017.11
708	C1QBP	NM_001212.3	NC_000017.11
708	C1QBP	NM_001212.3	NC_000017.11
710	SERPING1	NM_000062.2	NC_000011.10
710	SERPING1	NM_000062.2	NC_000011.10
710	SERPING1	NM_000062.2	NC_000011.10
710	SERPING1	NM_000062.2	NC_000011.10
712	C1QA	NM_015991.2	NC_000001.11
712	C1QA	NM_015991.2	NC_000001.11
712	C1QA	NM_015991.2	NC_000001.11
712	C1QA	NM_015991.2	NC_000001.11
713	C1QB	NM_000491.3	NC_000001.11
713	C1QB	NM_000491.3	NC_000001.11
713	C1QB	NM_000491.3	NC_000001.11
713	C1QB	NM_000491.3	NC_000001.11
714	C1QC	NM_172369.3	NC_000001.11
714	C1QC	NM_172369.3	NC_000001.11
714	C1QC	NM_172369.3	NC_000001.11
714	C1QC	NM_172369.3	NC_000001.11
716	C1S	NM_201442.2	NC_000012.12
716	C1S	NM_201442.2	NC_000012.12
716	C1S	NM_201442.2	NC_000012.12
716	C1S	NM_201442.2	NC_000012.12
717	C2	NM_000063.5	NC_000006.12
717	C2	NM_000063.5	NC_000006.12
717	C2	NM_000063.5	NC_000006.12
717	C2	NM_000063.5	NC_000006.12
718	C3	NM_000064.3	NC_000019.10
718	C3	NM_000064.3	NC_000019.10
718	C3	NM_000064.3	NC_000019.10
718	C3	NM_000064.3	NC_000019.10
719	C3AR1	NM_004054.2	NC_000012.12
719	C3AR1	NM_004054.2	NC_000012.12
719	C3AR1	NM_004054.2	NC_000012.12
719	C3AR1	NM_004054.2	NC_000012.12
720	C4A	NM_007293.2	NC_000006.12
720	C4A	NM_007293.2	NC_000006.12
720	C4A	NM_007293.2	NC_000006.12
720	C4A	NM_007293.2	NC_000006.12
721	C4B	NM_001002029.3	NC_000006.12
721	C4B	NM_001002029.3	NC_000006.12
721	C4B	NM_001002029.3	NC_000006.12
721	C4B	NM_001002029.3	NC_000006.12
722	C4BPA	NM_000715.3	NC_000001.11
722	C4BPA	NM_000715.3	NC_000001.11
722	C4BPA	NM_000715.3	NC_000001.11
722	C4BPA	NM_000715.3	NC_000001.11
725	C4BPB	NM_001017365.1	NC_000001.11
725	C4BPB	NM_001017365.1	NC_000001.11
725	C4BPB	NM_001017365.1	NC_000001.11
[truncated: 74,442 more rows]
